# Supplementary material for: Ablation of palladin in adult heart causes dilated cardiomyopathy associated with intercalated disc abnormalities
Source: eLife journal article supplement (doi:10.7554/elife.78629), 2023-03-16

Figure 6—figure supplement 4—source data 1. Uncropped Western blots.

Coomassie

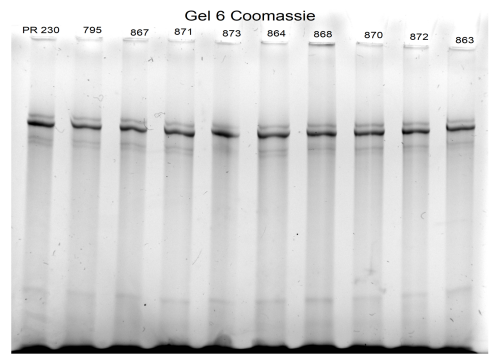

pTTN-Ser3991

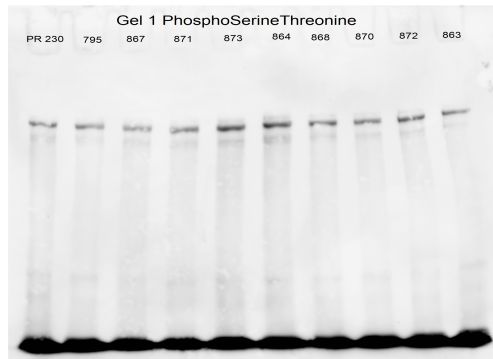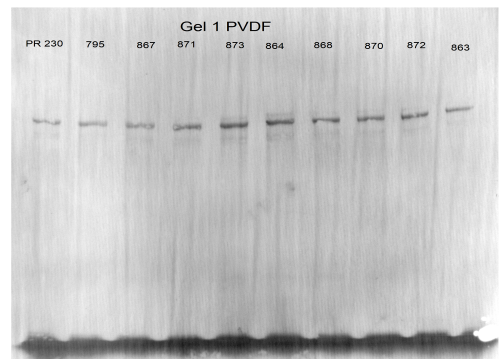

pTTN-Ser/Thr

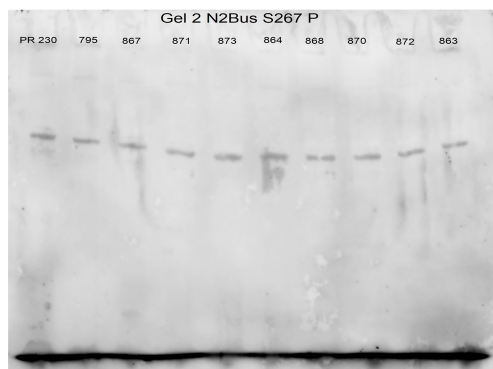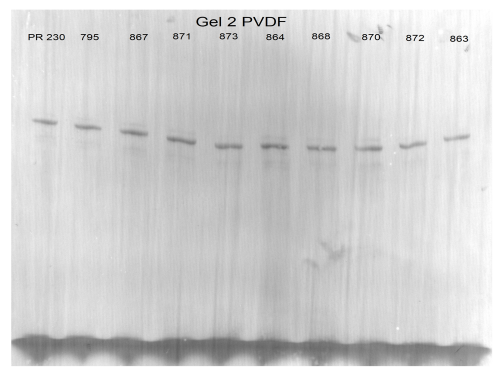

pTTN-Ser4080

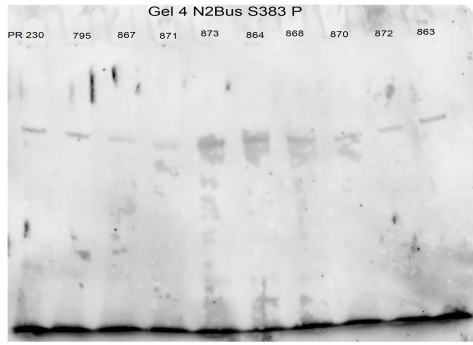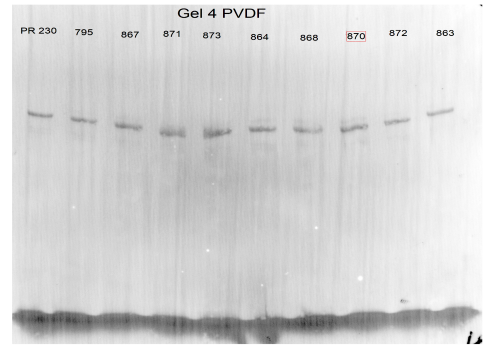

pTTN-Ser12742

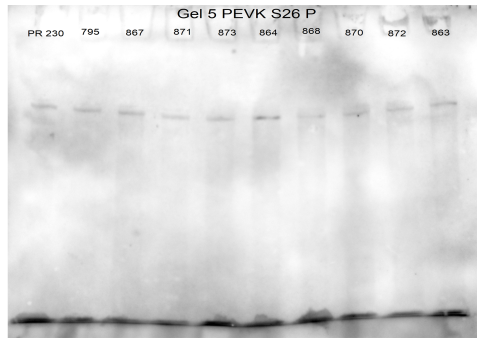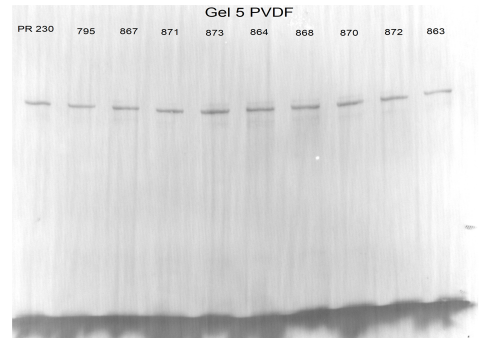

Coomassie

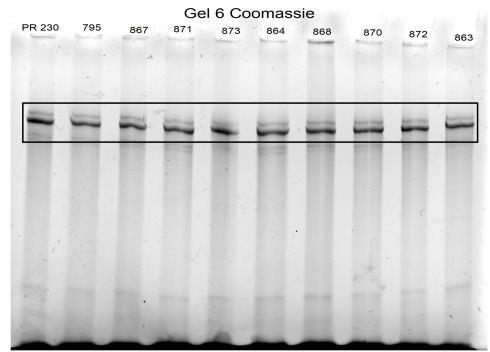

pTTN-Ser3991

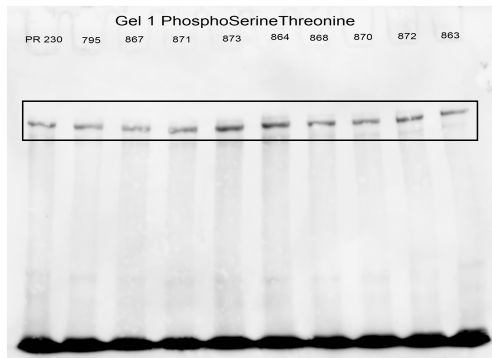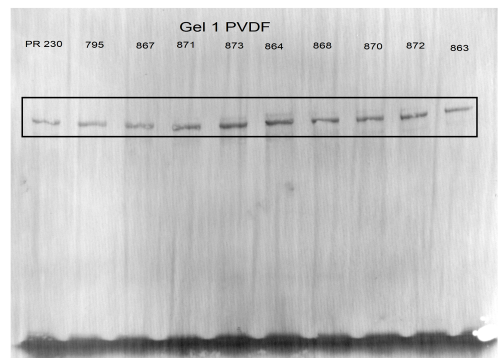

pTTN-Ser/Thr

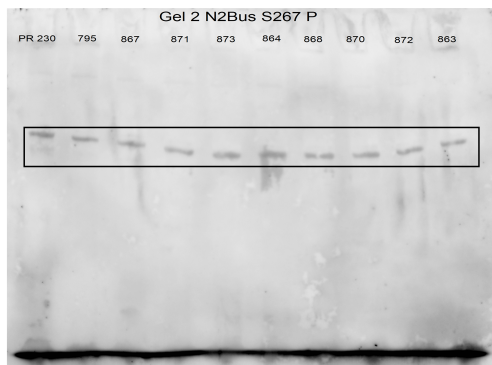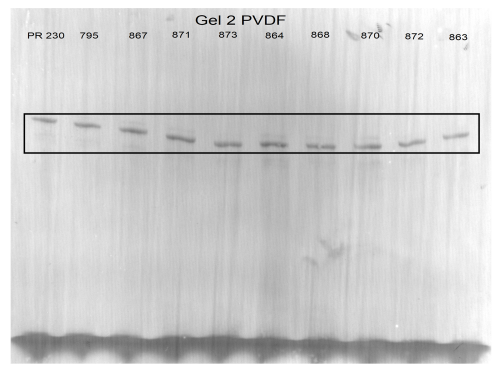

pTTN-Ser4080

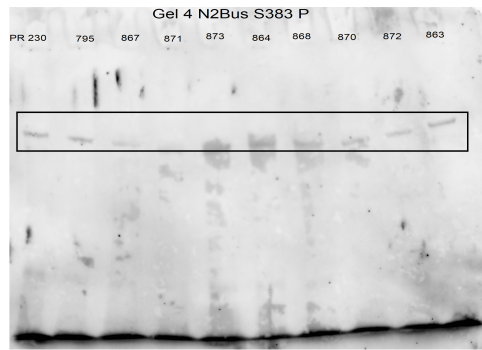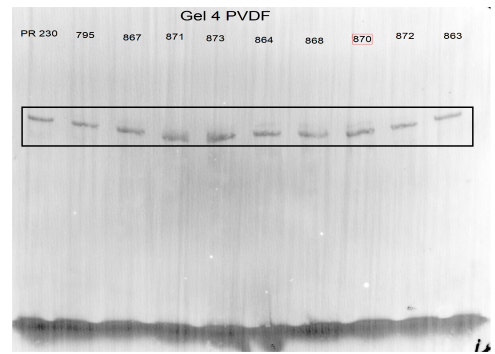

pTTN-Ser12742

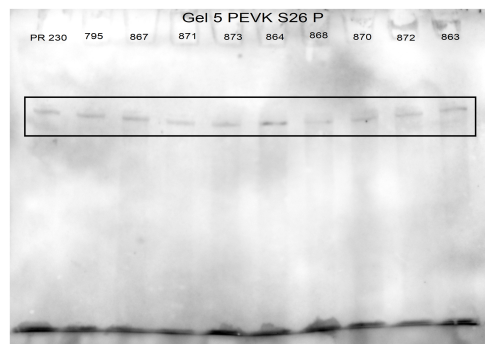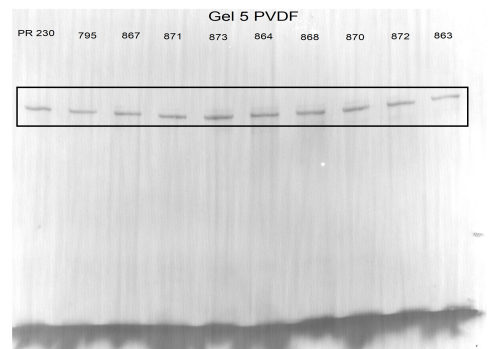

Supplement: fig6-figsupp4-data1 [file elife-78629-fig6-figsupp4-data1-v2.pdf]
