# Supplementary material for: Ablation of palladin in adult heart causes dilated cardiomyopathy associated with intercalated disc abnormalities
Source: eLife journal article supplement (doi:10.7554/elife.78629), 2023-03-16
Supplement: fig2-data5 [file Figure 2-source data 5.xlsx]

## Sheet: Figure 2F
Figure 2–source data 5. Quantification of interstitial and perivascular fibrosis in the left ventricle of cardiomyocyte-specific palladin (cPKO) and control male mice subjected to transaortic constriction TAC or SHAM.
F		Interstitial fibrosis (%)					G		Perivascular fibrosis (%)
		SHAM		TAC					SHAM		TAC
		Palldfl/fl	Palldfl/fl;Myh6Cre/+	Palldfl/fl	Palldfl/fl;Myh6Cre/+				Palldfl/fl	Palldfl/fl;Myh6Cre/+	Palldfl/fl	Palldfl/fl;Myh6Cre/+
		0.3226	0.2679	1.6279	0.5486				0.3226	0.2679	1.6279	0.5486
		0.3357	0.3564	0.7132	0.6353				0.3357	0.3564	0.7132	0.6353
		0.31425	0.305262	0.8633	0.6388				0.31425	0.305262	0.8633	0.6388
	Average	0.324183	0.309854	1.06813	0.607567			Average	0.324183	0.309854	1.06813	0.607567
	SEM	0.00624248	0.0256507	0.283218	0.0295006			SEM	0.00624248	0.0256507	0.283218	0.0295006
