# Supplementary material for: Ablation of palladin in adult heart causes dilated cardiomyopathy associated with intercalated disc abnormalities
Source: eLife journal article supplement (doi:10.7554/elife.78629), 2023-03-16

Figure 3—source data 2. Uncropped Western blots for Figure 3B.

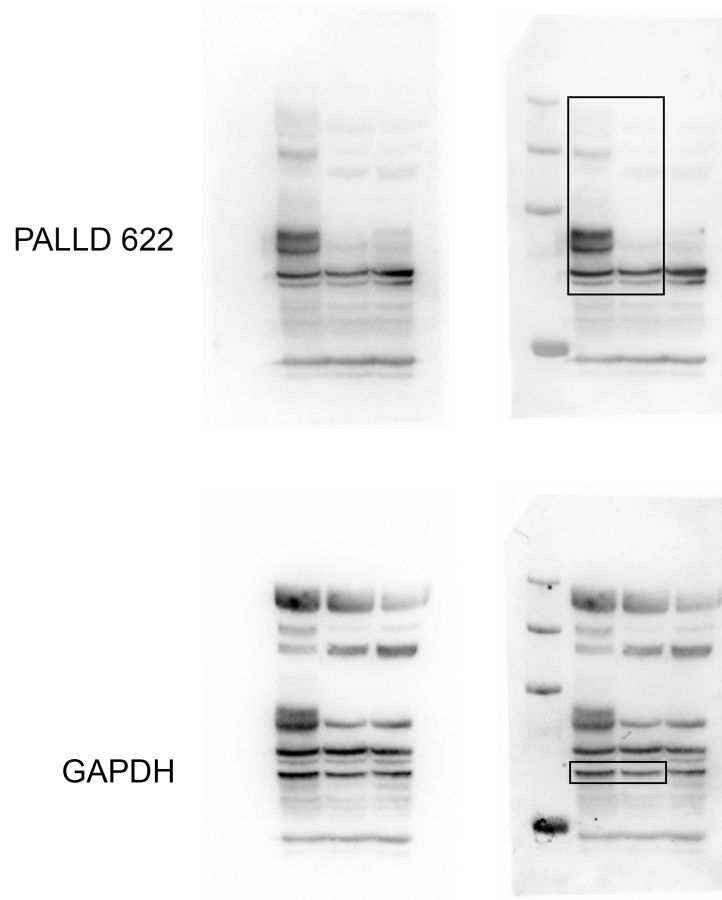

Supplement: fig3-data2 [file elife-78629-fig3-data2-v2.pdf]
