# Supplementary material for: Ablation of palladin in adult heart causes dilated cardiomyopathy associated with intercalated disc abnormalities
Source: eLife journal article supplement (doi:10.7554/elife.78629), 2023-03-16

Figure 6—source data 1. Uncropped Western blots for Figure 6A.

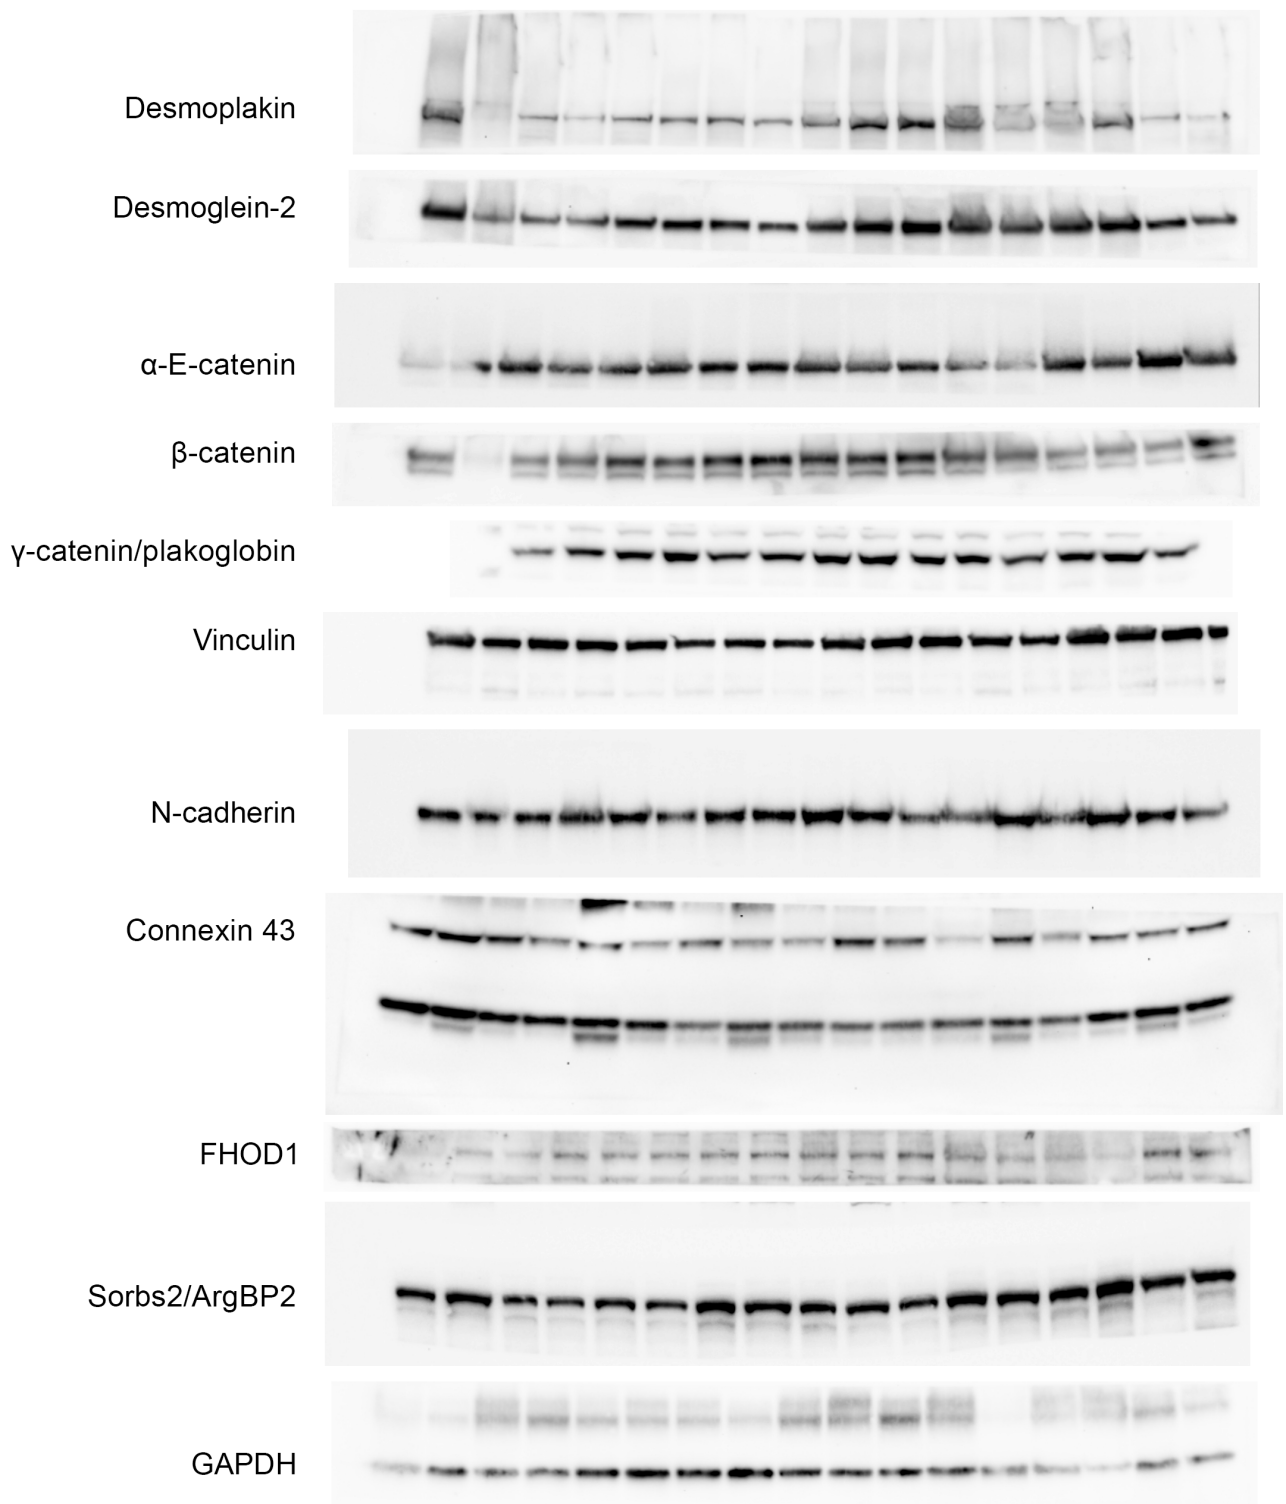

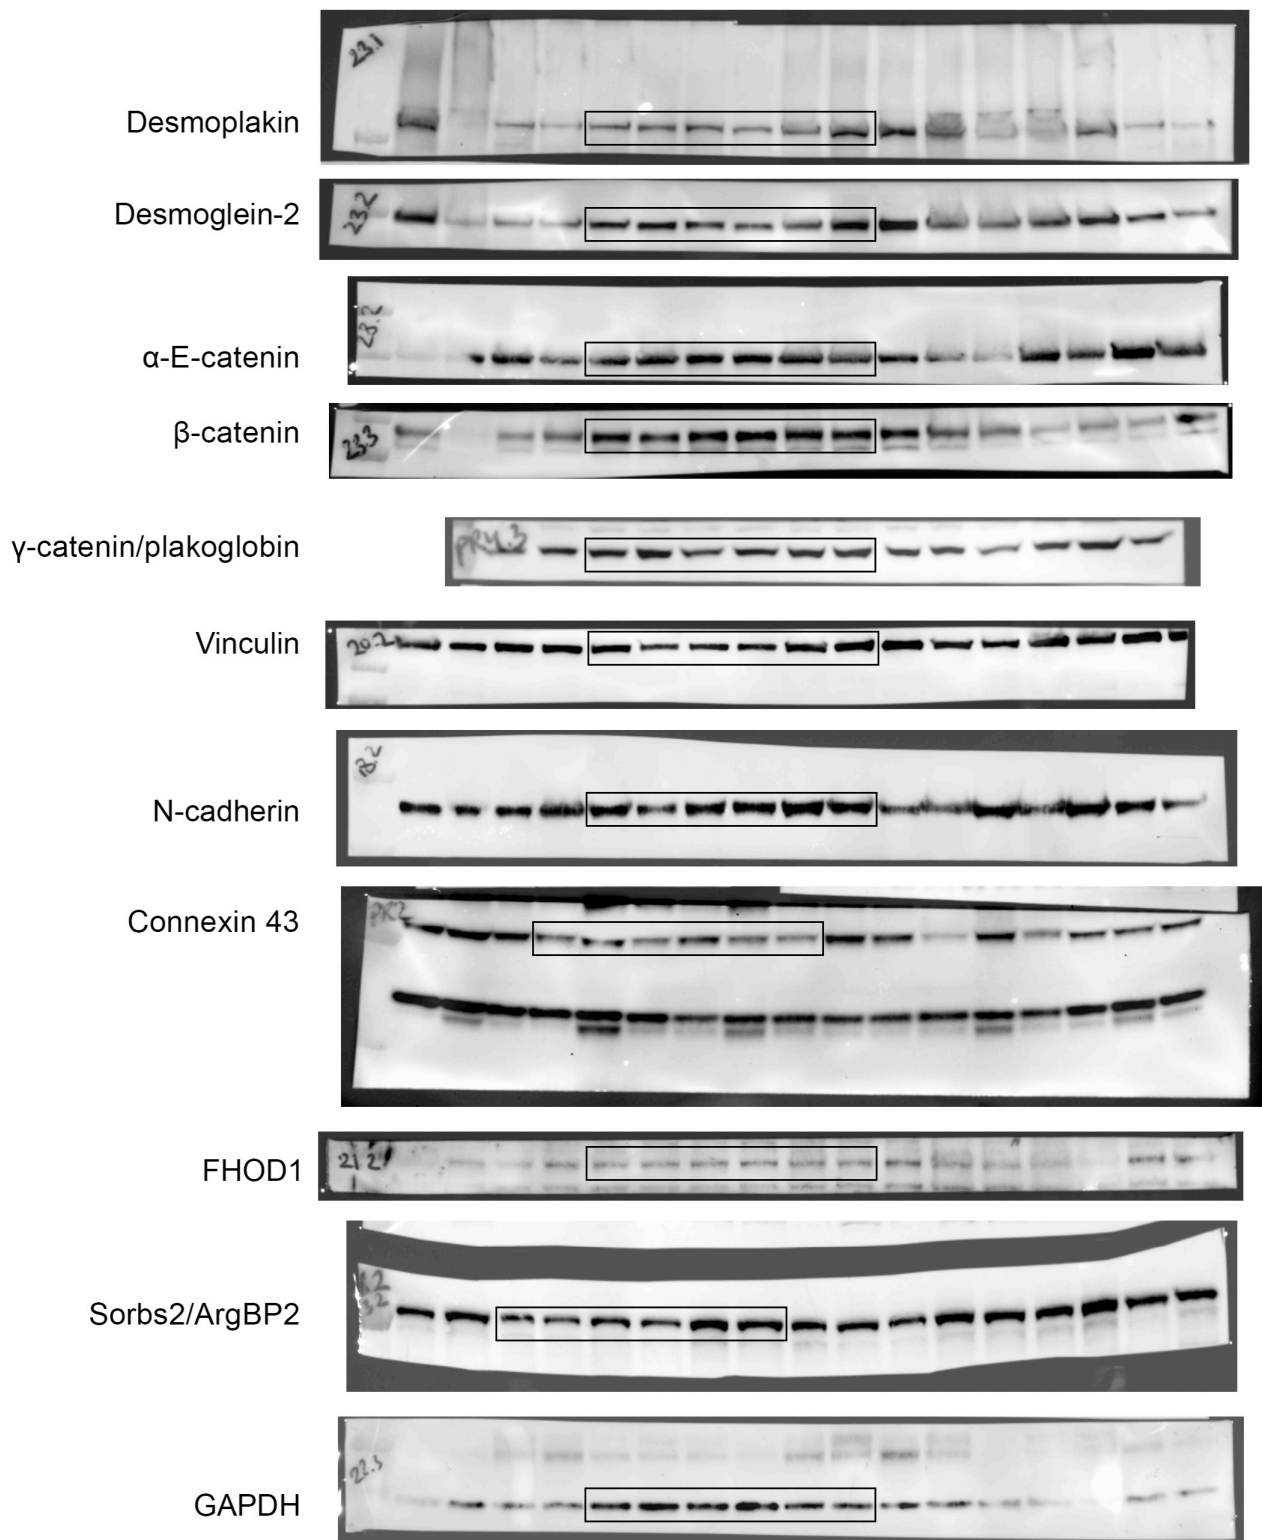

Supplement: fig6-data1 [file elife-78629-fig6-data1-v2.pdf]
