# Supplementary material for: Ablation of palladin in adult heart causes dilated cardiomyopathy associated with intercalated disc abnormalities
Source: eLife journal article supplement (doi:10.7554/elife.78629), 2023-03-16

Figure 6—figure supplement 3—source data 1. Uncropped Western blots.

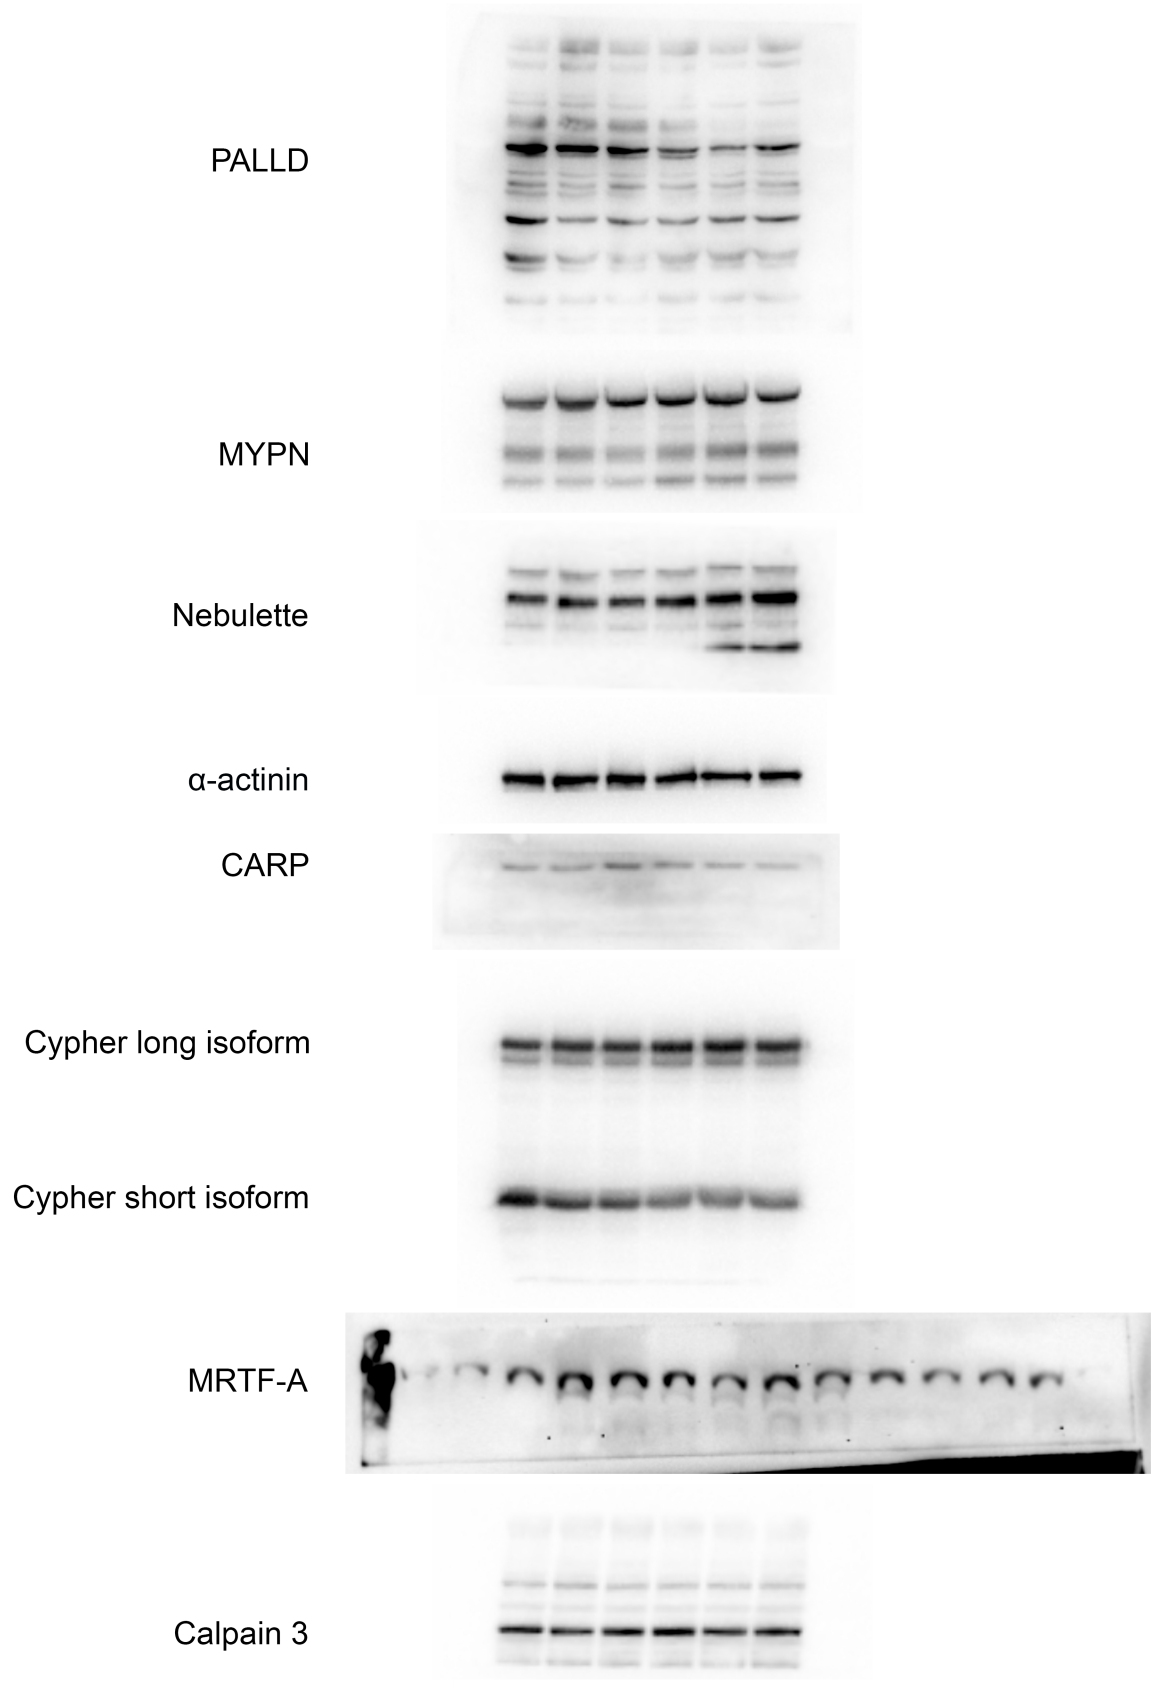

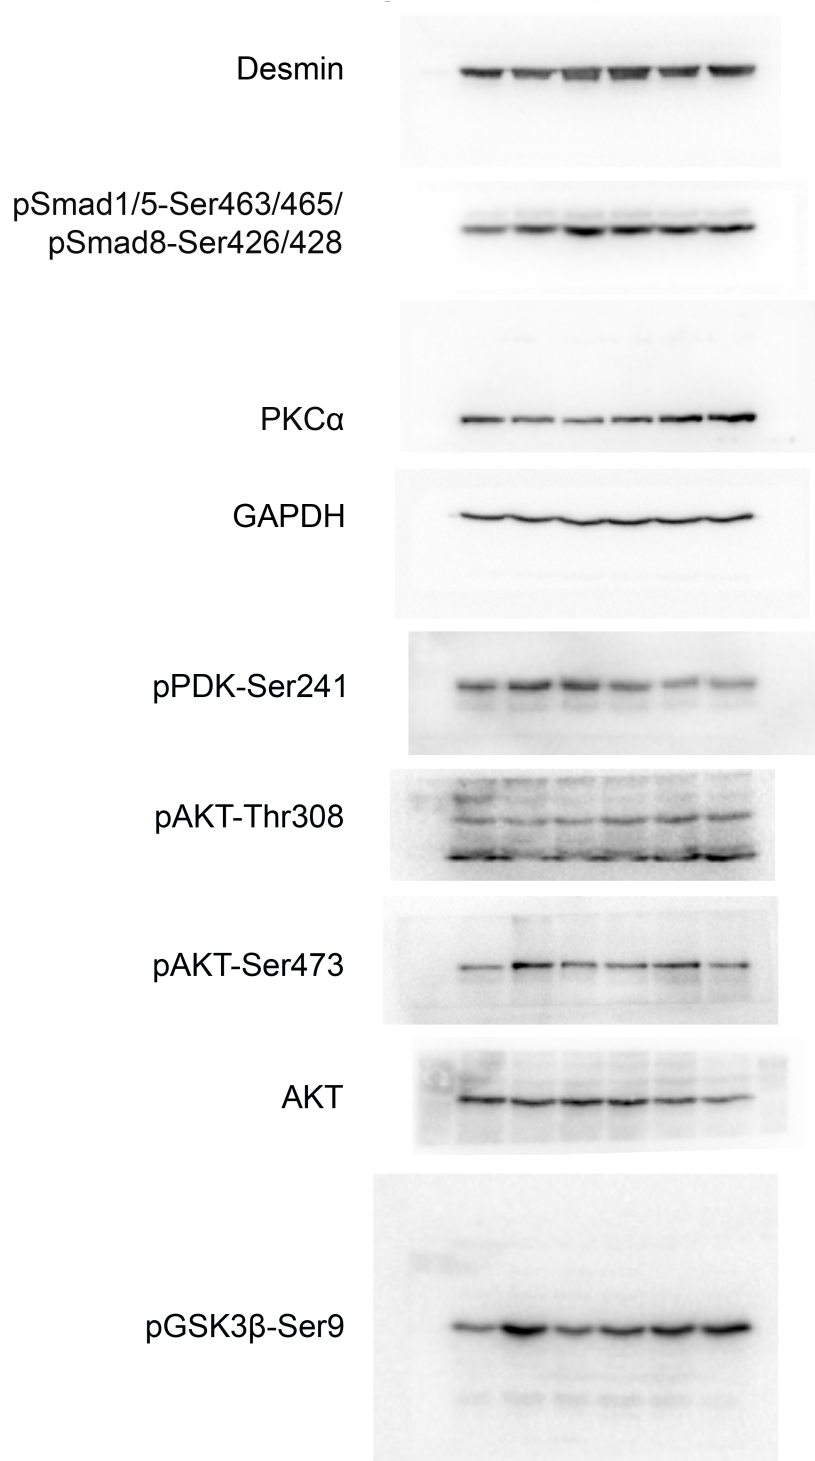

GSK3 $\beta$

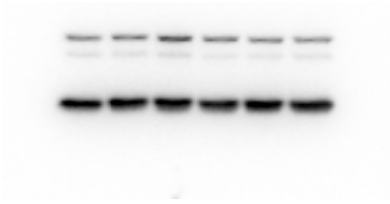

pP70S6K-Thr421/Ser424

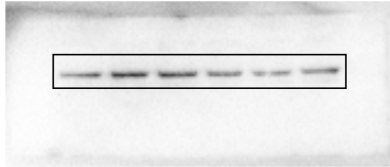

P70S6K

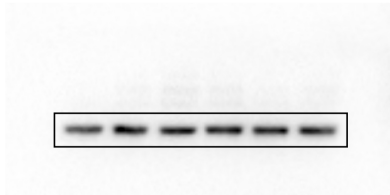

pMEK1/2-Ser217/221

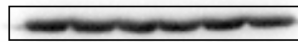

pErk1/2-Thr202/Tyr204

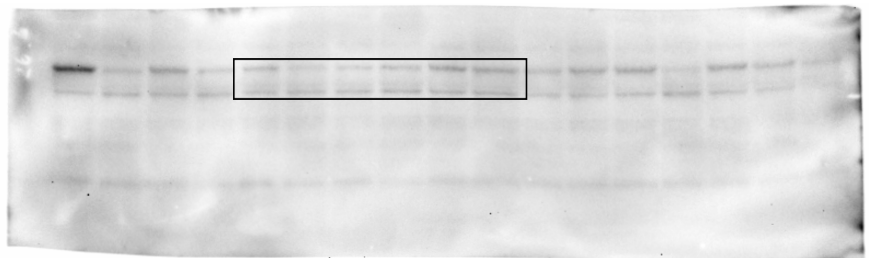

Erk1/2

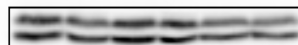

pP38-Thr180/Tyr182

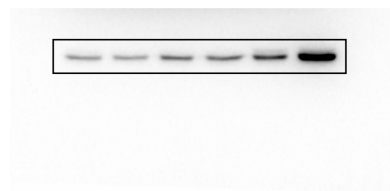

P38

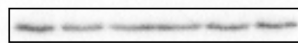

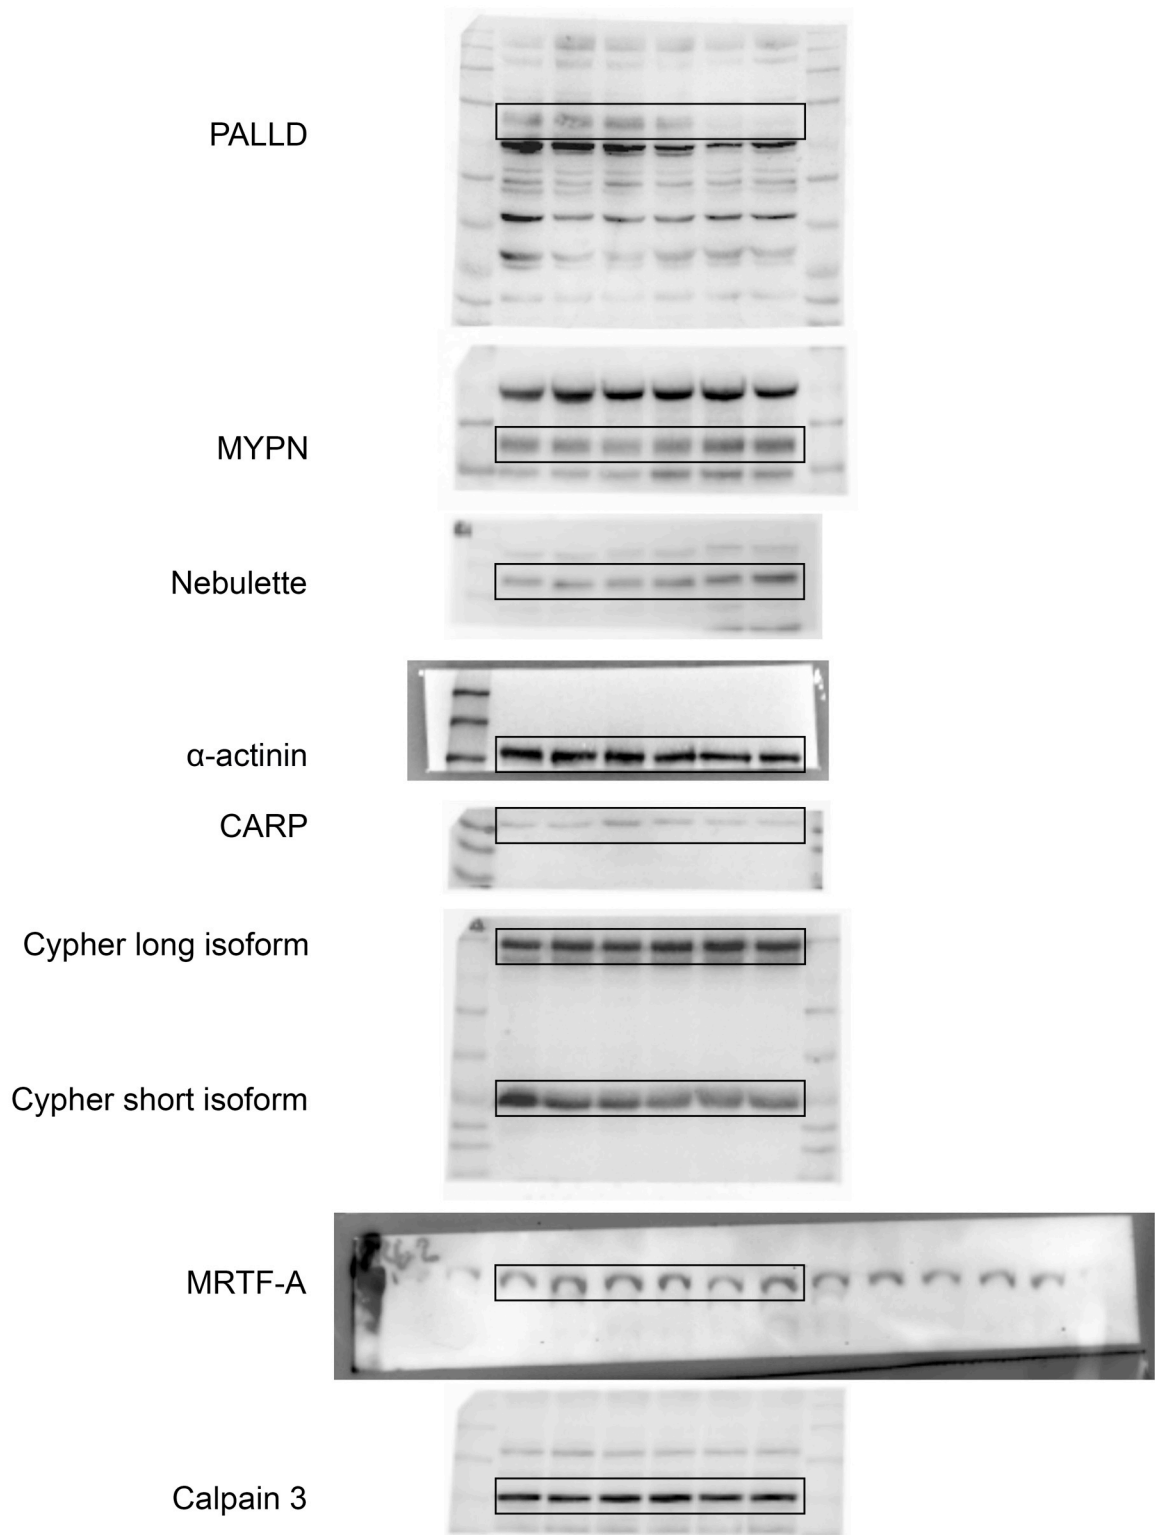

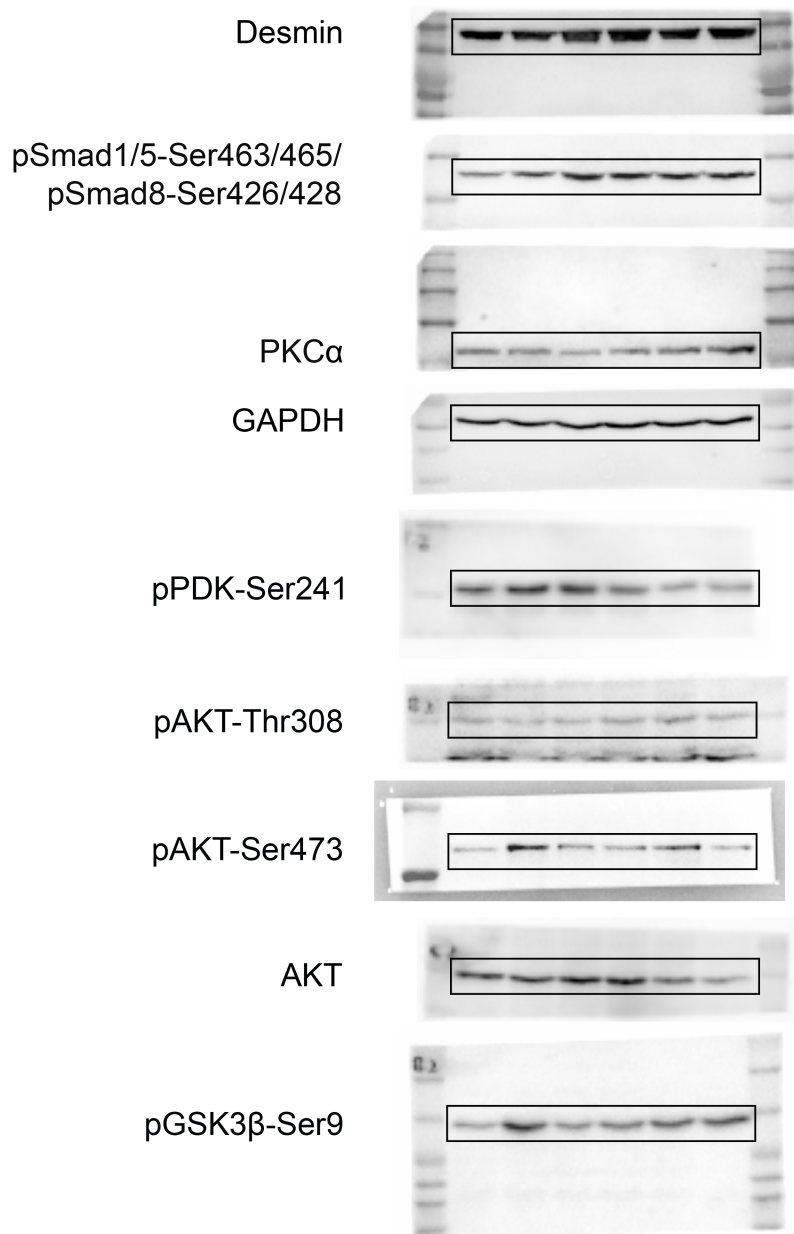

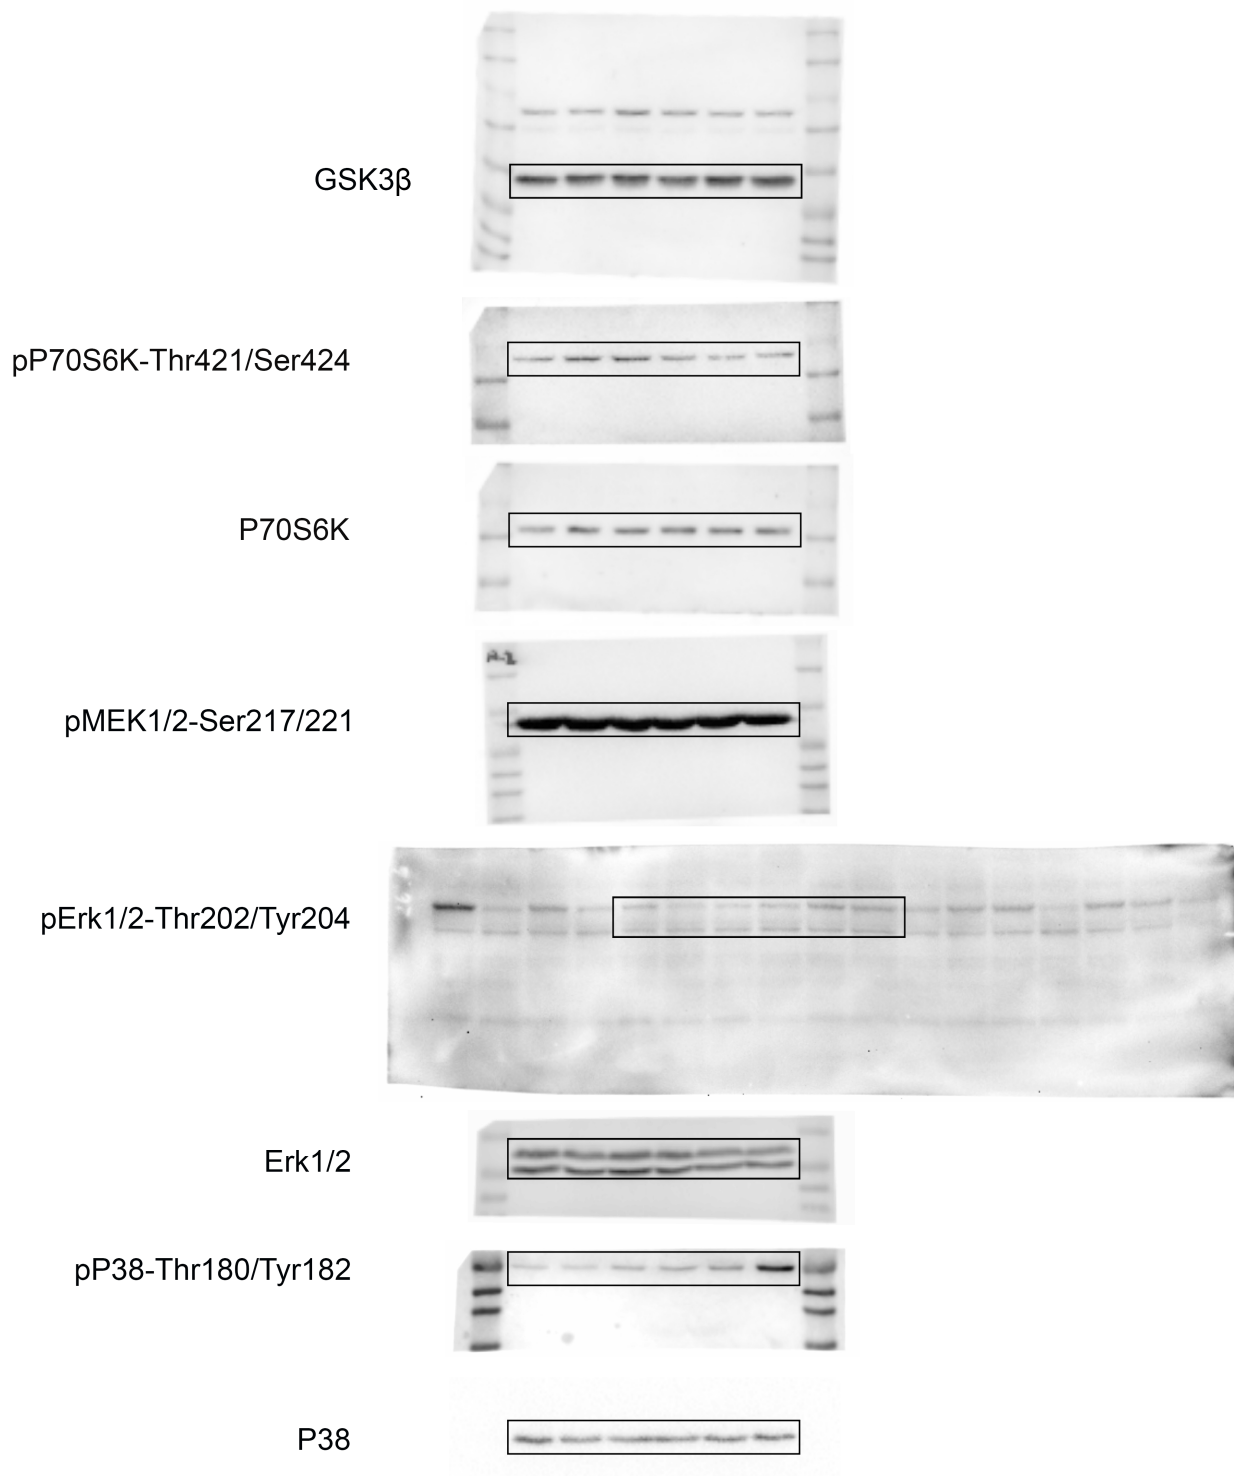

Supplement: fig6-figsupp3-data1 [file elife-78629-fig6-figsupp3-data1-v2.pdf]
