# Supplementary material for: Ablation of palladin in adult heart causes dilated cardiomyopathy associated with intercalated disc abnormalities
Source: eLife. 2023 Mar 16;12:e78629. doi: 10.7554/eLife.78629 (PMC10069870; doi:10.7554/eLife.78629)
Supplement: Figure 1—source data 1. [file elife-78629-fig1-data1.xlsx]

## Sheet: Figure 1B
Figure 1–source data 1. Confirmation of PALLD-CARP and PALLD-FHOD1 interactions in NanoBRET protein interaction assays
B	Left		BRET ratio
			PALLD-HaloTag + SCR-NanoLuc	PALLD-HaloTag + CARP-NanoLuc
			0	13.41
			2.02	15.2
			0.73	12.5
		Average	0.916667	13.7033
		SEM	0.590546	0.793102
	Right		BRET ratio
			PALLD-HaloTag + SCR-NanoLuc	PALLD-HaloTag + FHOD1-NanoLuc
			4.62	18.66
			0	14.96
			1.01	14.28
				9.57
		Average	1.87667	14.3675
		SEM	1.40231	1.86638
			\
