# Supplementary material for: Ablation of palladin in adult heart causes dilated cardiomyopathy associated with intercalated disc abnormalities
Source: eLife. 2023 Mar 16;12:e78629. doi: 10.7554/eLife.78629 (PMC10069870; doi:10.7554/eLife.78629)
Supplement: Figure 2—figure supplement 2—source data 2. [file elife-78629-fig2-figsupp2-data2.xlsx]

## Sheet: Figure 2-figure supplement 2
Figure 2–figure supplement 2–source data 2. Echocardiographic analysis on 3- and 6-month-old cardiomyocyte-specific palladin (cPKO) and control male mice.
A	Palldfl/fl 3M
		Age (weeks)	BW (g)	HR (bpm)	LVIDd (mm)	LVIDs (mm)	IVSd (mm)	IVSs (mm)	LVPWd (mm)	LVPWs (mm)	FS (%)	EF (%)	LVM (mg)	LVM/BW (mg/g)
		13.1429	31	516	3.13	1.86	0.92	1.46	0.89	1.37	40.7	72.9	95.7	3.087
		14.1429	28	621	3.65	2.27	0.85	1.29	0.88	1.35	37.9	68.9	115.8	4.136
		14	24	570	3.36	2.04	0.79	1.3	0.73	1.21	39.3	71	84.4	3.517
		14	28	585	3.6	2.16	0.8	1.38	0.88	1.28	40	71.6	107.6	3.843
		14	27	508	3.12	2.02	0.82	1.2	0.8	1.24	35.2	66	81.3	3.011
		15.2857	26	625	3.56	2.2	0.9	1.49	0.86	1.21	38.1	69.2	112.1	4.312
		15.8571	30	577	3.66	2.19	0.97	1.47	0.82	1.4	40.2	71.8	120.3	4.01
		15.2857	30	600	3.54	2.21	0.83	1.48	0.86	1.27	37.6	68.6	105.5	3.517
		15.4286	29	551	3.59	2.27	0.94	1.49	0.8	1.3	36.9	67.7	113.2	3.903
		12	26	630	3.05	1.63	0.76	1.21	0.81	1.27	46.6	79.4	74.7	2.873
		11.9	26	594	2.97	1.86	0.83	1.13	0.78	1.13	37.3	68.9	74.5	2.865
		11.9	26	350	3.43	2.14	0.78	1.19	0.86	1.21	37.5	68.7	96.4	3.708
		11.9	29	558	3.56	2.17	0.85	1.24	0.76	1.25	39	70.4	99.5	3.431
		11.9	25	592	3.18	2.08	0.74	1.17	0.82	1.17	34.7	65.2	79.6	3.184
		11.3	25	514	3.47	2.24	0.75	1.14	0.74	1.17	35.4	65.9	86.1	3.444
		11.3	25	598	3.31	2.07	0.95	1.32	0.99	1.31	37.4	68.6	115.2	4.608
		11.3	26	522	3.57	2.19	0.74	1.09	0.76	1.21	38.6	69.9	91.3	3.512
	Total	13.2143	27.1176	559.471	3.39706	2.09412	0.836471	1.29706	0.825882	1.25588	38.3765	69.6882	97.2471	3.58594
	SEM	0.395592	0.506446	16.2091	0.0551853	0.0416838	0.01837	0.034039	0.0159747	0.0179677	0.660633	0.79497	3.7243	0.122232
	Myh6Cre/+ 3M
		Age (wks)	BW (g)	HR (bpm)	LVIDd (mm)	LVIDs (mm)	IVSd (mm)	IVSs (mm)	LVPWd (mm)	LVPWs (mm)	FS (%)	EF (%)	LVM (mg)	LVM/BW (mg/g)
		13.4286	27	591	3.79	2.52	0.96	1.33	0.95	1.33	33.5	62.9	139.4	5.163
		13.4286	26	553	3.59	2.38	0.88	1.28	0.81	1.08	33.7	63.5	108.4	4.169
		13.4286	25	550	3.45	2.17	0.78	1.34	0.86	1.25	37.1	68.2	96.8	3.872
		14.1429	32	496	3.85	2.57	0.86	1.35	0.78	1.3	33.3	62.6	116.5	3.641
		15.5714	28	533	3.68	2.18	1.02	1.47	0.86	1.3	40.6	72.2	130.2	4.65
		11.1429	26	634	3.4	2.14	0.77	1.09	0.79	1.23	37	68.1	89	3.423
		12	27	649	3.68	2.26	0.75	1.3	0.84	1.25	38.7	70	104.2	3.859
	Total	13.3061	27.2857	572.286	3.63429	2.31714	0.86	1.30857	0.841429	1.24857	36.2714	66.7857	112.071	4.111
	SEM	0.540335	0.865043	20.8598	0.0628247	0.0662145	0.0386067	0.043063	0.0217594	0.0311241	1.07984	1.4375	6.78944	0.229672
	Palldfl/fl;Myh6Cre/+ 3M
		Age (weeks)	BW (g)	HR (bpm)	LVIDd (mm)	LVIDs (mm)	IVSd (mm)	IVSs (mm)	LVPWd (mm)	LVPWs (mm)	FS (%)	EF (%)	LVM (mg)	LVM/BW (mg/g)
		14.1429	22	447	3.59	2.33	0.68	1.05	0.83	1.13	35.3	65.6	93.5	4.25
		14.1429	24	585	3.87	2.57	0.79	1.3	0.7	1.13	33.6	63.1	103.9	4.329
		13.8571	25	610	3.31	2.14	0.73	1.15	0.76	1.19	35.3	66	80	3.2
		13.5714	30	540	3.61	2.32	0.83	1.08	0.79	1.27	35.8	66.4	103.1	3.437
		14.1429	27	592	3.8	2.47	0.79	1.08	0.82	1.14	35	65	111.4	4.126
		13.1429	35	619	3.84	2.48	0.86	1.27	0.88	1.25	35.5	65.6	126.1	3.603
		14	31	591	3.47	2.15	0.98	1.4	0.97	1.28	38.2	69.5	126	4.065
		11.3	27	594	3.39	2.04	0.79	1.22	0.82	1.19	39.7	71.5	92	3.407
		11.3	28	557	3.49	2.23	0.84	1.2	0.74	1.23	35.9	66.6	94.5	3.375
		12	28	539	3.15	1.91	0.77	1.23	0.83	1.25	39.4	71.3	81.3	2.904
		12	25	789	3.59	2.11	0.74	1.24	0.79	1.13	41.3	73.1	95	3.8
		12	24	545	3.22	2.02	0.8	1.15	0.78	1.25	37.1	68.4	82.1	3.421
		11.3	27	623	3.19	1.92	0.86	1.12	0.8	1.33	39.9	71.9	87.3	3.233
		11.3	28	465	3.48	2.18	0.66	1.06	0.68	1.21	37.3	68.4	75.1	2.682
		11.3	27	681	3.2	1.96	0.81	1.19	0.9	1.17	38.7	70.5	91.1	3.374
		11.3	25	674	3.16	1.94	0.69	1.09	0.79	1.19	38.7	70.4	73.3	2.932
	Total	12.55	27.0625	590.688	3.46	2.17312	0.78875	1.17688	0.805	1.20875	37.2938	68.3312	94.7312	3.50862
	SEM	0.310242	0.782457	20.5746	0.0611487	0.0528025	0.0199974	0.0244731	0.0180046	0.0151348	0.548214	0.736643	4.01706	0.122795
	Palldfl/fl 6M
		Age (wks)	BW (g)	HR (bpm)	LVIDd (mm)	LVIDs (mm)	IVSd (mm)	IVSs (mm)	LVPWd (mm)	LVPWs (mm)	FS (%)	EF (%)	LVM (mg)	LVM/BW (mg/g)
		33	33	563	3.39	2.08	0.83	1.25	0.7	1.19	38.6	70.1	85.9	2.603
		33	41	594	3.61	2.18	0.81	1.25	0.84	1.23	39.5	71	105.4	2.571
		33	28	526	3.42	2.04	0.83	1.23	0.86	1.26	40.4	72.2	99.6	3.557
		33	31	518	3.78	2.52	0.66	1.12	0.77	1.1	33.3	62.7	94.6	3.052
		32.7143	35	646	3.53	2.12	0.82	1.23	0.95	1.33	40	71.7	112.5	3.214
		32.7143	38	562	3.52	2.17	0.78	1.25	0.81	1.29	38.4	69.7	96.5	2.539
		25.1429	29	1000	3.32	2.08	0.88	1.25	0.71	1.13	37.4	68.7	87.3	3.01
		25.8571	30	1000	3.69	2.34	0.88	1.35	0.9	1.31	36.5	67.1	120.8	4.027
		24.9	35	582	3.39	2.06	0.81	1.26	0.78	1.15	39.1	70.8	91	2.6
		24.9	39	626	3.56	2.28	0.85	1.33	0.94	1.29	35.9	66.5	115.4	2.959
		24.9	40	656	3.34	1.98	0.86	1.25	0.88	1.13	40.7	72.6	101	2.525
	Total	29.3753	34.4545	661.182	3.50455	2.16818	0.819091	1.25182	0.830909	1.21909	38.1636	69.3727	100.909	2.96882
	SEM	1.22559	1.39064	52.2342	0.0447084	0.0474211	0.0184122	0.0176232	0.0257065	0.0248799	0.673157	0.892096	3.47692	0.145988
	Myh6Cre/+ 6M
		Age (wks)	BW (g)	HR (bpm)	LVIDd (mm)	LVIDs (mm)	IVSd (mm)	IVSs (mm)	LVPWd (mm)	LVPWs (mm)	FS (%)	EF (%)	LVM (mg)	LVM/BW (mg/g)
		86.1429	32	635	3.71	2.37	0.94	1.22	0.78	1.17	36.1	66.6	116.3	3.634
		79.7143	38	596	3.64	2.21	0.78	1.25	0.83	1.27	39.3	70.7	103.2	2.716
		75.2857	31	558	3.42	2.11	0.83	1.21	0.85	1.27	38.5	69.9	99.5	3.21
		79.8571	30	589	3.39	2.05	0.9	1.35	0.87	1.27	39.4	71.1	105	3.5
		86	33	635	3.46	1.89	0.84	1.31	0.83	1.27	45.4	77.8	100.7	3.052
		27.6	33	567	3.8	2.4	0.84	1.31	0.76	1.23	37	67.7	110.5	3.348
		76.7143	28	565	3.63	2.27	0.9	1.33	0.86	1.24	37.5	68.4	117	4.179
		62.1429	38	473	3.66	2.36	1.03	1.32	0.81	1.33	35.5	65.8	125.6	3.305
	Total	71.6821	32.875	577.25	3.58875	2.2075	0.8825	1.2875	0.82375	1.25625	38.5875	69.75	109.725	3.368
	SEM	6.8374	1.25978	18.251	0.052319	0.0634921	0.0275649	0.0187797	0.0136195	0.0161397	1.09389	1.33028	3.27238	0.152374
	Palldfl/fl;Myh6Cre/+ 6M
		Age (weeks)	BW (g)	HR (bpm)	LVIDd (mm)	LVIDs (mm)	IVSd (mm)	IVSs (mm)	LVPWd (mm)	LVPWs (mm)	FS (%)	EF (%)	LVM (mg)	LVM/BW (mg/g)
		33	34	615	3.27	2.15	0.85	1.16	0.76	1.18	34.3	64.6	86.8	2.553
		32	41	565	3.46	2.27	0.85	1.35	0.96	1.33	34.2	64.4	112.3	2.739
		32.7143	37	667	3.77	2.24	0.79	1.29	0.83	1.21	40.4	71.9	110.5	2.986
		32	33	621	3.07	1.86	0.65	1.09	0.76	1.19	39.5	71.6	65.8	1.994
		32	36	598	3.22	1.98	0.72	1.2	0.82	1.19	38.4	70	80.2	2.228
		25.2857	34	609	3.53	2.34	0.92	1.23	0.83	1.19	33.6	63.5	110.2	3.241
		25.2857	30	655	3.51	2.09	0.82	1.25	0.79	1.17	40.5	72.2	97.9	3.263
		25.2857	31	652	3.32	2	0.85	1.32	0.82	1.14	39.9	71.8	94.3	3.042
		25.2857	32	600	3.44	2.13	0.91	1.34	0.86	1.21	38	69.3	107.8	3.369
		25.2857	30	598	3.36	2.2	0.76	1.08	0.69	1.27	34.6	65	79.3	2.643
		25.1429	34	537	3.75	2.45	0.85	1.27	0.82	1.21	34.7	64.7	114.6	3.371
		25.1429	35	666	3.39	1.95	0.74	1.19	0.77	1.21	42.5	74.7	84.3	2.409
		25.8571	30	525	3.74	2.24	0.83	1.32	0.79	1.18	40	71.4	109.1	3.637
		25	31	631	3.36	2.04	0.86	1.26	0.86	1.2	39.1	70.8	100	3.226
		25	32	582	3.38	2.14	0.83	1.31	0.82	1.21	36.5	67.5	94.6	2.956
	Total	27.619	33.3333	608.067	3.438	2.13867	0.815333	1.244	0.812	1.206	37.7467	68.8933	96.5133	2.91047
	SEM	0.896561	0.79082	11.2243	0.0514476	0.0407649	0.0186411	0.0220562	0.0154981	0.0114143	0.739103	0.933935	3.79034	0.121385
