# Supplementary material for: Ablation of palladin in adult heart causes dilated cardiomyopathy associated with intercalated disc abnormalities
Source: eLife. 2023 Mar 16;12:e78629. doi: 10.7554/eLife.78629 (PMC10069870; doi:10.7554/eLife.78629)
Supplement: Figure 2—figure supplement 2—source data 3. [file elife-78629-fig2-figsupp2-data3.xlsx]

## Sheet: Figure 2-figure supplement 2
Figure 2–figure supplement 2–source data 3. Quantification of interstitial and perivascular fibrosis in the left ventricle of 6-month-old cardiomyocyte-specific palladin (cPKO) and control male mice.
		Interstitial fibrosis (%)					Perivascular fibrosis (%)
C		Palldfl/fl	MyhCre/+	Palldfl/fl;Myh6Cre/+			Palldfl/fl	MyhCre/+	Palldfl/fl;Myh6Cre/+
		0.3115	0.654	0.3358			0.065292	0.061674	0.06602
		0.5799	0.2742	0.4157			0.097135	0.064076	0.202191
		0.4158	0.2733	0.1899			0.142705	0.087602	0.076553
		0.3256	0.1126	0.4625			0.011712	0.091079	0.064329
		0.661	0.4345	0.2686			0.012994	0.127402	0.083923
				0.2794					0.033936
	Average	0.45876	0.34972	0.325317		Average	0.0659676	0.0863666	0.0878253
	SEM	0.069584	0.0915268	0.0411344		SEM	0.0251101	0.0118622	0.0239119
