# Supplementary material for: Ablation of palladin in adult heart causes dilated cardiomyopathy associated with intercalated disc abnormalities
Source: eLife. 2023 Mar 16;12:e78629. doi: 10.7554/eLife.78629 (PMC10069870; doi:10.7554/eLife.78629)
Supplement: Figure 2—source data 1. [file elife-78629-fig2-data1.xlsx]

## Sheet: Figure 2A, C
Figure 2–source data 1. Quantitative real-time PCR (qRT-PCR) and densitometry of Western blots on cardiomyocyte-specific palladin (cPKO) and control male mice.
A	qRT-PCR
		Palld (fold change)
	Palldfl/fl	200 kDa	140 kDa	90 kDa
		1.14	1.14	0.8
		1.03	0.85	1.28
		0.78	1.01	0.92
		1.05
	Average	1	1	1
	SEM	0.0771362	0.083865	0.144222
	Palldfl/fl;Cre+/0	200 kDa	140 kDa	90 kDa
		0.27	0.23	0.23
		0.24	0.42	0.27
		0.25	0.27	0.26
	Average	0.253333	0.306667	0.253333
	SEM	0.00881917	0.0578312	0.0120185
C	Western blot densitometry
		PALLD 90 kDa isoform (fold change)
		Palldfl/fl	Palldfl/fl;Myh6Cre/+
		1.18	0.09
		0.89	0.08
		0.86	0.11
		1.07	0.02
			0
			0.03
	Average	1	0.055
	SEM	0.0758288	0.0180278
