# Supplementary material for: Ablation of palladin in adult heart causes dilated cardiomyopathy associated with intercalated disc abnormalities
Source: eLife. 2023 Mar 16;12:e78629. doi: 10.7554/eLife.78629 (PMC10069870; doi:10.7554/eLife.78629)
Supplement: Figure 2—source data 4. [file elife-78629-fig2-data4.xlsx]

## Sheet: Figure 2D
Figure 2–source data 4. Echocardiographic analysis on cardiomyocyte-specific palladin (cPKO) and control male mice subjected to transaortic constriction (TAC) or SHAM.
D	Palldfl/fl basal
		Age (weeks)	BW (g)	HR (bpm)	LVIDd (mm)	LVIDs (mm)	IVSd (mm)	IVSs (mm)	LVPWd (mm)	LVPWs (mm)	FS (%)	EF (%)	LVM (mg)	LVM/BW (mg/g)
		7.1	26	632	3.29	2.02	0.75	1.23	0.88	1.35	38.7	70.3	89.2	3.431
		7.1	23	618	3.3	1.82	0.72	1.19	0.77	1.27	44.8	77.3	79.9	3.474
		7.1	25	599	3.53	2.19	0.76	1.21	0.77	1.27	38.1	69.3	92	3.68
		7.1	25	581	3.26	1.92	0.76	1.23	0.86	1.24	41.1	73.2	87.5	3.5
		6.4	22	467	3.3	2.02	0.76	1.13	0.76	1.06	38.8	70.5	82	3.727
		6.4	21	519	3.07	1.7	0.74	1.2	0.67	1.25	44.6	77.3	65.5	3.119
		6.4	23	529	3.38	2.24	0.69	1.08	0.75	1.09	33.6	63.6	78.9	3.43
		6.4	23	825	3.33	2.01	0.73	1.24	0.74	1.21	39.9	71.7	78.9	3.43
		8.4	24	525	3.45	2.04	0.76	1.18	0.78	1.25	41	72.9	89.9	3.746
	Total	6.93333	23.5556	588.333	3.32333	1.99556	0.741111	1.18778	0.775556	1.22111	40.0667	71.7889	82.6444	3.50411
	SEM	0.217307	0.529966	34.566	0.0428823	0.0558796	0.00806991	0.0174625	0.0208907	0.0304341	1.1431	1.39994	2.73009	0.0650524
	Myh6Cre/+ basal
		Age (weeks)	BW (g)	HR (bpm)	LVIDd (mm)	LVIDs (mm)	IVSd (mm)	IVSs (mm)	LVPWd (mm)	LVPWs (mm)	FS (%)	EF (%)	LVM (mg)	LVM/BW (mg/g)
		7	21	490	3.16	1.93	0.78	1.19	0.77	1.28	38.9	70.7	78	3.714
		7.1	21	616	2.98	1.77	0.79	1.27	0.88	1.08	40.5	72.8	78.4	3.733
		7.1	23	619	3.44	1.9	0.86	1.34	0.78	1.31	44.8	77.1	96.7	4.204
		7.1	22	483	3.25	1.88	0.74	1.15	0.82	1.21	42.2	74.5	82.5	3.75
		7	23	613	3.33	1.86	0.8	1.38	0.84	1.25	44.2	76.6	92	4
		7	23	608	3.15	1.61	0.8	1.38	0.8	1.28	48.9	81.6	81.5	3.543
		7	23	558	3.66	2.25	0.65	1.18	0.81	1.17	38.6	69.8	92	4
		6.6	20	627	3.32	2.02	0.79	1.23	0.8	1.22	39	70.7	87.3	4.365
		5.9	23	634	3.52	2.1	0.78	1.27	0.84	1.27	40.5	72.2	98.5	4.283
		5.7	21	567	3.45	2.06	0.75	1.21	0.72	1.26	40.3	72.1	83.6	3.981
		9.1	22	536	3.42	2.09	0.75	1.14	0.77	1.2	39	70.5	86.2	3.918
		9.1	23	453	3.15	1.8	0.85	1.29	0.91	1.19	42.6	75.1	92.7	4.03
		9.1	21	449	2.96	1.73	0.82	1.16	0.86	1.19	41.7	74.3	78.4	3.733
		9.1	23	533	3.2	1.89	0.8	1.19	0.81	1.21	40.9	73	84.2	3.661
	Total	7.42143	22.0714	556.143	3.285	1.92071	0.782857	1.24143	0.815	1.22286	41.5786	73.6429	86.5714	3.9225
	SEM	0.316606	0.2864	17.7658	0.0538491	0.0454219	0.0137652	0.0219354	0.0131245	0.0156693	0.763392	0.860789	1.82445	0.0658616
	Palldfl/fl;Myh6Cre/+ basal
		Age (weeks)	BW (g)	HR (bpm)	LVIDd (mm)	LVIDs (mm)	IVSd (mm)	IVSs (mm)	LVPWd (mm)	LVPWs (mm)	FS (%)	EF (%)	LVM (mg)	LVM/BW (mg/g)
		7.1	26	596	3.4	1.97	0.76	1.29	0.8	1.29	42.1	74.2	88.4	3.4
		7.1	26	664	2.98	1.51	0.75	1.15	0.83	1.14	49.4	82.2	73	2.808
		6.4	22	623	2.99	1.75	0.78	1.27	0.77	1.21	41.6	74.1	71.6	3.255
		5.7	18	640	3.25	2	0.65	1.07	0.62	1.04	38.4	70	62.5	3.472
		5.9	19	666	2.81	1.57	0.79	1.04	0.72	1.09	44.1	77.1	62.8	3.305
		5.9	20	608	3.12	1.9	0.71	1.13	0.78	1.18	38.9	70.8	72.7	3.635
		5.7	17	550	3.12	2.14	0.78	1.13	0.72	1.03	31.3	60.6	72.7	4.276
		5.7	18	527	3.2	2.18	0.68	0.96	0.67	0.95	32	61.5	65.9	3.661
		8.4	22	578	3.11	1.88	0.81	1.28	0.86	1.23	39.3	71.3	84.1	3.823
		8.4	24	607	3.52	2	0.86	1.35	0.8	1.23	43.1	75.3	101.8	4.242
		8.4	24	559	3.5	2.12	0.8	1.2	0.82	1.19	39.3	70.8	97.8	4.075
		8.4	25	467	3.54	2.09	0.86	1.29	0.81	1.15	41.1	72.9	103.4	4.136
		8.3	26	579	3.33	2.01	0.86	1.26	0.89	1.26	39.7	71.5	100.3	3.858
	Total	7.03077	22.0769	589.538	3.22077	1.93231	0.776154	1.18615	0.776154	1.15308	40.0231	71.7154	81.3077	3.68815
	SEM	0.333856	0.929995	15.486	0.0634122	0.0581681	0.0185202	0.0323748	0.0210475	0.0278131	1.30944	1.59683	4.26968	0.121211
	Palldfl/fl TAC 1W
		Age (weeks)	BW (g)	HR (bpm)	LVIDd (mm)	LVIDs (mm)	IVSd (mm)	IVSs (mm)	LVPWd (mm)	LVPWs (mm)	FS (%)	EF (%)	LVM (mg)	LVM/BW (mg/g)
		9.1	29	533	3.87	2.57	0.98	1.4	0.97	1.42	33.4	62.9	148.3	5.114
		9.1	26	636	3.7	2.31	0.78	1.28	0.8	1.34	37.6	68.6	103.4	3.977
		8.6	23	607	3.3	2.1	0.87	1.19	0.86	1.27	36.2	67.2	97.8	4.252
		8.4	22	598	3.36	2.08	0.82	1.29	0.9	1.32	38.1	69.6	100	4.545
	Total	8.8	25	593.5	3.5575	2.265	0.8625	1.29	0.8825	1.3375	36.325	67.075	112.375	4.472
	SEM	0.177951	1.58114	21.7351	0.136405	0.1142	0.0432772	0.0430116	0.035678	0.0311916	1.05465	1.47613	12.0303	0.243399
	Myh6Cre/+ TAC 1W
		Age (weeks)	BW (g)	HR (bpm)	LVIDd (mm)	LVIDs (mm)	IVSd (mm)	IVSs (mm)	LVPWd (mm)	LVPWs (mm)	FS (%)	EF (%)	LVM (mg)	LVM/BW (mg/g)
		9	23	629	3.98	2.81	0.81	1.25	0.88	1.32	29.5	57.1	128.6	5.591
		9.1	24	597	4.01	2.61	0.84	1.37	0.86	1.35	35	64.9	131.1	5.463
		9.1	23	550	3.63	2.53	0.91	1.36	0.92	1.39	30.3	58.7	122.6	5.33
		9	25	591	3.51	2.15	0.83	1.39	0.87	1.32	38.6	69.9	105.4	4.216
		9	24	647	3.16	2.04	0.98	1.38	0.86	1.35	35.5	66.4	99.7	4.154
		8.7	23	503	3.46	2.08	0.9	1.33	0.95	1.41	39.7	71.4	115.2	5.009
		9.1	21	365	3.56	2.32	0.87	1.29	0.82	1.31	34.8	65	107.2	5.105
		9.1	22	379	3.4	2.25	0.97	1.34	0.88	1.33	33.8	63.8	112.6	5.118
		9.1	22	527	3.21	2.13	0.98	1.29	1	1.37	33.5	63.7	113.8	5.173
		9.1	22	549	3.6	2.33	0.93	1.27	1.03	1.48	35.2	65.6	133.4	6.064
	Total	9.03	22.9	533.7	3.552	2.325	0.902	1.327	0.907	1.363	34.59	64.65	116.96	5.1223
	SEM	0.0395811	0.378594	30.3842	0.0885287	0.0798645	0.0200444	0.0155671	0.021242	0.0165362	0.998493	1.37963	3.64601	0.1838
	Palldfl/fl;Myh6Cre/+ TAC 1W
		Age (weeks)	BW (g)	HR (bpm)	LVIDd (mm)	LVIDs (mm)	IVSd (mm)	IVSs (mm)	LVPWd (mm)	LVPWs (mm)	FS (%)	EF (%)	LVM (mg)	LVM/BW (mg/g)
		9.1	27	512	3.59	2.65	0.94	1.28	1.06	1.38	26.2	52.4	136.2	5.044
		8.4	24	551	3.8	2.4	0.84	1.35	0.89	1.22	37	67.6	122.4	5.1
		8	23	577	3.58	2.44	0.9	1.27	0.87	1.22	31.7	60.6	114.5	4.978
		8	24	435	3.55	2.37	0.83	1.23	0.92	1.39	33.3	62.9	111.2	4.633
		8	24	478	3.52	2.38	0.81	1.24	0.76	1.36	32.6	62	95.2	3.967
		7.9	21	565	3.22	2.11	0.93	1.29	0.85	1.3	34.4	64.9	97.7	4.652
		9.6	19	466	3.51	2.56	0.89	1.35	1.07	1.49	27	53.7	128.4	6.758
	Total	8.42857	23.1429	512	3.53857	2.41571	0.877143	1.28714	0.917143	1.33714	31.7429	60.5857	115.086	5.01886
	SEM	0.251391	0.961858	20.5612	0.0646392	0.0642487	0.0192372	0.018089	0.0425225	0.03695	1.47258	2.12462	5.75228	0.324528
	Palldfl/fl TAC 2W
		Age (weeks)	BW (g)	HR (bpm)	LVIDd (mm)	LVIDs (mm)	IVSd (mm)	IVSs (mm)	LVPWd (mm)	LVPWs (mm)	FS (%)	EF (%)	LVM (mg)	LVM/BW (mg/g)
		9.4	25	562	3.4	2.16	0.84	1.27	0.73	1.36	36.5	67.5	90	3.6
		9.4	24	548	3.74	2.49	0.84	1.25	0.9	1.31	33.5	63.1	120.5	5.021
		10.1	30	600	3.77	2.5	1.04	1.49	1.04	1.59	33.6	63.2	156.3	5.21
		10.1	27	679	3.61	2.34	1.13	1.53	1.06	1.49	35.1	65.4	157.8	5.844
	Total	9.75	26.5	597.25	3.63	2.3725	0.9625	1.385	0.9325	1.4375	34.675	64.8	131.15	4.91875
	SEM	0.202073	1.32288	29.3808	0.0841625	0.0797261	0.0730725	0.0727438	0.076308	0.0634265	0.7099	1.04483	16.2005	0.473504
	Myh6Cre/+ TAC 2W
		Age (weeks)	BW (g)	HR (bpm)	LVIDd (mm)	LVIDs (mm)	IVSd (mm)	IVSs (mm)	LVPWd (mm)	LVPWs (mm)	FS (%)	EF (%)	LVM (mg)	LVM/BW (mg/g)
		10.1	25	696	3.92	2.87	1.03	1.29	1.05	1.43	26.7	52.9	166.2	6.648
		10.1	25	539	3.63	2.4	0.96	1.36	1.02	1.46	34	63.9	137.9	5.516
		10.1	24	439	4.07	2.99	1.01	1.38	0.93	1.47	26.7	52.6	159.6	6.65
		10.1	24	520	3.39	2.14	0.94	1.39	1.09	1.49	37	68.1	128.3	5.346
		10.1	26	560	3.68	2.3	0.96	1.34	0.86	1.26	37.5	68.4	124.5	4.788
		10.1	26	483	3.42	2.11	0.89	1.23	1.01	1.41	38.3	69.6	117.8	4.531
		10.1	26	593	3.78	2.41	0.92	1.44	0.68	1.29	36.2	66.7	109.8	4.223
		9.7	23	608	3.44	1.95	0.8	1.36	1.08	1.52	43.4	75.6	117.7	5.117
		10.1	24	584	3.57	2.34	0.95	1.3	1.05	1.43	34.5	64.6	135.2	5.633
		10.1	23	566	3.46	2.27	1.02	1.33	1.08	1.52	34.5	64.7	139.6	6.07
		10.1	22	643	3.49	2.25	0.92	1.33	1.02	1.43	35.6	66.1	126	5.727
		10.1	24	445	3.5	2.2	0.92	1.39	0.92	1.38	37.1	68.1	117	4.875
	Total	10.0667	24.3333	556.333	3.6125	2.3525	0.943333	1.345	0.9825	1.42417	35.125	65.1083	131.633	5.427
	SEM	0.0333333	0.376051	22.2017	0.0619032	0.0865686	0.0181464	0.0159307	0.0344244	0.0235635	1.33995	1.88673	4.97151	0.223751
	Palldfl/fl;Myh6Cre/+ TAC 2W
		Age (weeks)	BW (g)	HR (bpm)	LVIDd (mm)	LVIDs (mm)	IVSd (mm)	IVSs (mm)	LVPWd (mm)	LVPWs (mm)	FS (%)	EF (%)	LVM (mg)	LVM/BW (mg/g)
		9.4	24	581	3.51	2.51	0.86	1.29	0.77	1	28.4	55.9	98.9	4.121
		8.9	22	527	3.67	2.57	0.91	1.31	0.92	1.28	30	58.1	125.3	5.695
		10.3	29	604	3.76	2.73	0.86	1.31	1.02	1.43	27.3	53.9	135.2	4.662
		9	24	517	3.81	2.65	0.75	1.1	0.8	1.19	30.5	58.7	106.6	4.442
		9	24	557	3.87	2.73	0.9	1.19	0.94	1.43	29.4	57	137.2	5.717
		9	24	649	3.49	2.33	0.93	1.27	1	1.39	33.4	63.2	124.5	5.188
		10.6	23	547	3.07	1.98	1.02	1.35	0.98	1.4	35.7	66.7	107.6	4.678
	Total	9.45714	24.2857	568.857	3.59714	2.5	0.89	1.26	0.918571	1.30286	30.6714	59.0714	119.329	4.929
	SEM	0.265345	0.837066	17.5016	0.103342	0.101489	0.0310146	0.0325869	0.0369316	0.0606204	1.10577	1.672	5.67071	0.233967
	Palldfl/fl TAC 4W
		Age (weeks)	BW (g)	HR (bpm)	LVIDd (mm)	LVIDs (mm)	IVSd (mm)	IVSs (mm)	LVPWd (mm)	LVPWs (mm)	FS (%)	EF (%)	LVM (mg)	LVM/BW (mg/g)
		12.1	31	552	4.06	2.5	0.97	1.41	0.96	1.41	38.4	69.2	158.4	5.11
		12.1	29	591	3.66	2.32	1.01	1.38	0.96	1.5	36.6	67.2	138.2	4.766
		11.4	26	565	3.64	2.36	0.84	1.28	0.78	1.32	35	65.2	104.3	4.012
		11.4	24	599	3.88	2.64	0.92	1.3	0.88	1.22	31.8	60.6	133.6	5.567
	Total	11.75	27.5	576.75	3.81	2.455	0.935	1.3425	0.895	1.3625	35.45	65.55	133.625	4.86375
	SEM	0.202073	1.55456	10.9877	0.0994987	0.0727438	0.0366288	0.0311916	0.04272	0.0600521	1.40089	1.84097	11.1605	0.327902
	Myh6Cre/+ TAC 4W
		Age (weeks)	BW (g)	HR (bpm)	LVIDd (mm)	LVIDs (mm)	IVSd (mm)	IVSs (mm)	LVPWd (mm)	LVPWs (mm)	FS (%)	EF (%)	LVM (mg)	LVM/BW (mg/g)
		12	27	659	3.98	2.83	1.04	1.41	1.11	1.43	29	56.3	178.9	6.626
		12.1	25	625	3.51	2.25	0.94	1.38	0.83	1.4	35.9	66.5	111.5	4.46
		12.1	25	546	3.96	2.81	0.97	1.36	0.88	1.39	29.1	56.5	144.1	5.764
		12	28	634	3.64	2.56	0.94	1.29	1.01	1.29	29.6	57.5	135.1	4.825
		12	27	473	4.17	2.74	0.85	1.42	1	1.39	34.3	63.8	156.2	5.785
		12.1	23	594	3.75	2.42	0.94	1.34	1.01	1.43	35.6	65.9	141.8	6.165
		12.1	26	621	3.47	2.18	1.09	1.41	1.03	1.49	37.3	68.4	141.3	5.435
		12.1	25	611	3.55	2.26	0.96	1.33	0.84	1.37	36.5	67.2	115.7	4.628
		12.1	25	561	3.88	2.82	1.13	1.37	0.96	1.32	27.2	53.7	165.5	6.62
	Total	12.0667	25.6667	591.556	3.76778	2.54111	0.984444	1.36778	0.963333	1.39	32.7222	61.7556	143.344	5.58978
	SEM	0.0166667	0.5	18.9239	0.0812708	0.0899297	0.0289209	0.0143157	0.0315348	0.0199304	1.30871	1.89312	7.23967	0.272456
	Palldfl/fl;Myh6Cre/+ TAC 4W
		Age (weeks)	BW (g)	HR (bpm)	LVIDd (mm)	LVIDs (mm)	IVSd (mm)	IVSs (mm)	LVPWd (mm)	LVPWs (mm)	FS (%)	EF (%)	LVM (mg)	LVM/BW (mg/g)
		12.1	31	513	3.93	2.79	0.98	1.53	1.08	1.47	29.1	56.4	164.5	5.306
		11.4	26	555	3.64	2.37	0.96	1.31	0.92	1.31	35	65.2	128.4	4.938
		10.9	25	471	3.46	2.22	0.9	1.33	0.84	1.27	35.9	66.6	106	4.24
		10.9	25	564	4.23	3.23	1.01	1.5	0.88	1.35	23.7	47.7	164.9	6.596
		10.9	26	518	3.55	2.67	0.92	1.34	1.02	1.45	24.9	50.2	128.8	4.954
		10.7	24	573	3.34	2.57	1.14	1.45	1.11	1.33	23.2	47.7	146.4	6.1
		12.6	26	506	4.25	3.28	1.06	1.32	0.97	1.31	22.7	45.9	182.3	7.012
	Total	11.3571	26.1429	528.571	3.77143	2.73286	0.995714	1.39714	0.974286	1.35571	27.7857	54.2429	145.9	5.59229
	SEM	0.274172	0.857143	13.8922	0.139206	0.152358	0.031461	0.0353024	0.0382882	0.0285238	2.13546	3.26955	10.0272	0.378812
