# Supplementary material for: Ablation of palladin in adult heart causes dilated cardiomyopathy associated with intercalated disc abnormalities
Source: eLife. 2023 Mar 16;12:e78629. doi: 10.7554/eLife.78629 (PMC10069870; doi:10.7554/eLife.78629)
Supplement: Figure 2—source data 7. [file elife-78629-fig2-data7.xlsx]

## Sheet: Figure 2G
Figure 2–source data 7. Echocardiographic analysis on 2- and 4-month-old cardiomyocyte-specific palladin (cPKO) and myopalladin (MYPN) double knockout and control male mice.
G	WT 2M
		Age (weeks)	BW (g)	HR (bpm)	LVIDd (mm)	LVIDs (mm)	IVSd (mm)	IVSs (mm)	LVPWd (mm)	LVPWs (mm)	FS (%)	EF (%)	LVM (mg)	LVM/BW (mg/g)
		10.3	26	771	3.65	2.22	0.84	1.22	0.8	1.23	39.1	70.4	106.7	4.104
		10.3	21	638	3.56	2.19	0.78	1.21	0.75	1.27	38.4	69.7	92.9	4.424
		10.3	24	556	3.76	2.3	0.74	1.21	0.78	1.17	38.9	70.1	101.1	4.213
		10.6	27	613	3.5	2.21	0.83	1.2	0.79	1.27	36.8	67.8	97.8	3.622
		10.6	26	639	3.58	2.21	0.84	1.2	0.83	1.19	38.3	69.6	106.4	4.092
		10.6	27	557	3.33	2.04	0.83	1.13	0.76	1.22	38.7	70.3	88.1	3.263
		10.6	23	594	3.23	1.98	0.76	1.25	0.83	1.23	38.5	70.1	83.9	3.648
		10.6	24	566	3.34	2	0.82	1.26	0.64	1.26	40.1	71.9	78.5	3.271
		10.3	21	627	3.47	2.18	0.74	1.11	0.62	1.07	37	68.1	77.1	3.671
		10.3	24	507	3.65	2.3	0.72	1.23	0.76	1.23	37.1	67.9	93.1	3.879
		9.9	25	620	3.31	1.96	0.79	1.08	0.75	1.19	40.7	72.7	83.5	3.34
		9.9	26	627	3.26	1.97	0.79	1.15	0.88	1.19	39.6	71.5	91.6	3.52
		9.9	25	626	3.13	1.73	0.78	1.13	0.79	1.26	44.8	77.5	77.9	3.12
		8.4	24	609	3.54	2.21	0.74	1.19	0.68	1.14	37.6	68.7	83.9	3.496
		8.4	22	575	3.1	1.95	0.71	1.11	0.69	1.23	37.1	68.5	66.1	3.005
		8	28	564	3.21	1.98	0.76	1.07	0.85	1.18	38.4	70.1	84.8	3.029
		8	27	647	3.28	1.94	0.73	1.15	0.73	1.18	41	73.1	76.7	2.841
		8	29	510	3.3	2.02	0.76	1.08	0.91	1.22	38.8	70.4	93.3	3.217
	Total	9.72222	24.9444	602.556	3.4	2.07722	0.775556	1.16556	0.768889	1.20722	38.9389	70.4667	87.9667	3.54194
	SEM	0.24261	0.539136	14.0875	0.0455755	0.0364325	0.0100073	0.0143537	0.0183981	0.0118489	0.448901	0.550045	2.5753	0.107188
	Palldfl/fl;Myh6Cre/+ 2M
		Age (weeks)	BW (g)	HR (bpm)	LVIDd (mm)	LVIDs (mm)	IVSd (mm)	IVSs (mm)	LVPWd (mm)	LVPWs (mm)	FS (%)	EF (%)	LVM (mg)	LVM/BW (mg/g)
		14.1429	22	447	3.59+F43	2.33	0.68	1.05	0.83	1.13	35.3	65.6	93.5	4.25
		14.1429	24	585	3.87	2.57	0.79	1.3	0.7	1.13	33.6	63.1	103.9	4.329
		13.8571	25	610	3.31	2.14	0.73	1.15	0.76	1.19	35.3	66	80	3.2
		13.5714	30	540	3.61	2.32	0.83	1.08	0.79	1.27	35.8	66.4	103.1	3.437
		14.1429	27	592	3.8	2.47	0.79	1.08	0.82	1.14	35	65	111.4	4.126
		13.1429	35	619	3.84	2.48	0.86	1.27	0.88	1.25	35.5	65.6	126.1	3.603
		14	31	591	3.47	2.15	0.98	1.4	0.97	1.28	38.2	69.5	126	4.065
		11.3	27	594	3.39	2.04	0.79	1.22	0.82	1.19	39.7	71.5	92	3.407
		11.3	28	557	3.49	2.23	0.84	1.2	0.74	1.23	35.9	66.6	94.5	3.375
		12	28	539	3.15	1.91	0.77	1.23	0.83	1.25	39.4	71.3	81.3	2.904
		12	25	789	3.59	2.11	0.74	1.24	0.79	1.13	41.3	73.1	95	3.8
		12	24	545	3.22	2.02	0.8	1.15	0.78	1.25	37.1	68.4	82.1	3.421
		11.3	27	623	3.19	1.92	0.86	1.12	0.8	1.33	39.9	71.9	87.3	3.233
		11.3	28	465	3.48	2.18	0.66	1.06	0.68	1.21	37.3	68.4	75.1	2.682
		11.3	27	681	3.2	1.96	0.81	1.19	0.9	1.17	38.7	70.5	91.1	3.374
		11.3	25	674	3.16	1.94	0.69	1.09	0.79	1.19	38.7	70.4	73.3	2.932
	Total	12.55	27.0625	590.688	3.45133	2.17312	0.78875	1.17688	0.805	1.20875	37.2938	68.3312	94.7312	3.50862
	SEM	0.310242	0.782457	20.5746	0.0647108	0.0528025	0.0199974	0.0244731	0.0180046	0.0151348	0.548214	0.736643	4.01706	0.122795
	Mypn-/- 2M
		Age (weeks)	BW (g)	HR (bpm)	LVIDd (mm)	LVIDs (mm)	IVSd (mm)	IVSs (mm)	LVPWd (mm)	LVPWs (mm)	FS (%)	EF (%)	LVM (mg)	LVM/BW (mg/g)
		8.9	22	424	3.52	2.24	0.81	1.25	0.72	1.05	36.2	66.9	91.7	4.168
		8.9	24	610	3.87	2.55	0.86	1.24	0.73	1.12	34	63.7	112.9	4.704
		8.9	23	541	3.6	2.31	0.78	1.22	0.8	1.12	35.9	66.4	99.4	4.322
		9.1	23	529	3.64	2.4	0.85	1.15	0.67	1.08	34.1	64	95.8	4.165
		9.1	23	496	3.66	2.44	0.76	1.28	0.93	1.15	33.2	62.7	111.6	4.852
		10.1	25	444	3.84	2.56	0.74	1.21	0.78	1.28	33.3	62.7	105.1	4.204
		9.7	23	597	3.46	2.13	0.76	1.18	0.65	1.23	38.6	70	79.7	3.465
		10.1	23	543	3.43	2.18	0.8	1.19	0.8	1.14	36.6	67.5	93.2	4.052
		9.7	23	533	3.5	2.18	0.82	1.21	0.7	1.21	37.8	68.9	89.8	3.904
		10.1	25	444	3.84	2.56	0.74	1.21	0.78	1.28	33.3	62.7	105.1	4.204
		10.1	28	827	3.68	2.32	0.81	1.29	0.72	1.05	37.1	67.9	99	3.536
		9.6	24	585	3.63	2.26	0.84	1.41	0.81	1.24	37.8	68.8	106.9	4.454
		9.6	23	579	3.48	2.14	0.82	1.27	0.8	1.19	38.5	69.9	96.4	4.191
		8.3	23	580	3.28	2.08	0.78	1.16	0.78	1.22	36.8	67.9	84.4	3.67
		9.4	25	676	3.3	2	0.77	1.15	0.77	1.19	39.4	71.1	83.3	3.33
		9.4	24	578	3.56	2.24	0.7	1.09	0.8	1.16	37.1	68	91	3.79
		9.4	24	660	3.48	2.18	0.84	1.07	0.88	1.2	37.4	68.5	105.2	4.38
		9.4	25	635	3.53	2.12	0.76	1.21	0.92	1.22	40	71.7	105.1	4.2
		9.4	26	643	3.54	2.2	0.68	1.17	0.72	1.21	38	69.2	82.4	3.17
		8.7	23	603	3.58	2.24	0.86	1.19	0.86	1.2	37.4	68.4	110.2	4.791
		8.7	24	485	3.62	2.3	0.7	1.15	0.76	1.21	36.4	67.1	90.3	3.763
		8.7	22	584	3.56	2.2	0.76	1.07	0.72	1.14	38.1	69.2	89.2	4.055
		9.6	24	607	3.34	2.07	0.88	1.23	0.92	1.16	38	69.4	105.6	4.4
	Total	9.34348	23.8696	574.043	3.56261	2.25652	0.787826	1.2	0.783478	1.17609	36.7391	67.5043	97.1	4.07696
	SEM	0.107031	0.283292	18.3513	0.0325055	0.0326111	0.0114719	0.0157676	0.0162199	0.0132286	0.408591	0.554481	2.07687	0.0932906
	Mypn-/-/Palldfl/fl 2M
		Age (weeks)	BW (g)	HR (bpm)	LVIDd (mm)	LVIDs (mm)	IVSd (mm)	IVSs (mm)	LVPWd (mm)	LVPWs (mm)	FS (%)	EF (%)	LVM (mg)	LVM/BW (mg/g)
		6.4	22	593	3.45	2.14	0.83	1.23	0.79	1.06	38.1	69.4	95.7	4.35
		6.4	21	590	3.29	1.96	0.91	1.18	0.69	1.14	40.5	72.5	87.3	4.157
		6.4	23	609	3.48	2.14	0.88	1.23	0.83	1.21	38.7	70.1	104.4	4.539
		8.1	22	550	3.61	2.49	0.85	1.2	0.71	1.15	31.1	59.7	98	4.455
		9.1	22	621	2.91	1.75	0.84	1.21	0.72	1.21	40.1	72.4	68.8	3.127
		9.1	26	558	3.41	2.17	0.87	1.27	0.8	1.06	36.4	67.3	98.2	3.777
	Total	7.58333	22.6667	586.833	3.35833	2.10833	0.863333	1.22	0.756667	1.13833	37.4833	68.5667	92.0667	4.0675
	SEM	0.549798	0.71492	11.3942	0.0991436	0.100313	0.0120185	0.0126491	0.0233333	0.0274975	1.41101	1.94451	5.17105	0.218267
	Mypn-/-/Palldfl/fl;Myh6Cre/+ 2M
		Age (weeks)	BW (g)	HR (bpm)	LVIDd (mm)	LVIDs (mm)	IVSd (mm)	IVSs (mm)	LVPWd (mm)	LVPWs (mm)	FS (%)	EF (%)	LVM (mg)	LVM/BW (mg/g)
		9.1	24	626	3.24	2.26	0.8	1.2	0.74	1.19	30.3	58.9	80.8	3.367
		6.4	21	628	3.46	2.28	0.84	1.08	0.74	1.1	34.3	64.4	93.1	4.433
		6.4	22	534	3.61	2.34	0.91	1.23	0.7	1.13	35.1	65.4	102.5	4.659
		8.1	24	500	3.81	2.69	0.84	1.19	0.81	1.03	29.4	57.1	115.8	4.825
		8.1	24	574	3.8	2.46	0.83	1.14	0.74	1.03	35.1	65.2	107.2	4.467
		8.1	24	644	3.43	2.17	0.83	1.21	0.82	1.15	36.8	67.8	96.9	4.038
		8.1	23	458	3.46	2.1	0.82	1.21	0.86	1.19	39.3	70.9	101.5	4.413
	Total	7.75714	23.1429	566.286	3.54429	2.32857	0.838571	1.18	0.772857	1.11714	34.3286	64.2429	99.6857	4.31457
	SEM	0.376612	0.459221	27.0077	0.0787055	0.0744001	0.0129887	0.0197605	0.0216811	0.0255151	1.31416	1.81801	4.18372	0.182607
	WT 4M
		Age (weeks)	BW (g)	HR (bpm)	LVIDd (mm)	LVIDs (mm)	IVSd (mm)	IVSs (mm)	LVPWd (mm)	LVPWs (mm)	FS (%)	EF (%)	LVM (mg)	LVM/BW (mg/g)
		17.3	30	607	3.56	2.15	0.86	1.28	0.85	1.26	39.5	71	108.9	3.63
		17.3	28	656	3.51	2.12	0.71	1.23	0.74	1.25	39.7	71.3	85.1	3.039
		17.3	28	458	3.6	2.13	0.72	1.19	0.8	1.19	40.8	72.5	94.1	3.361
		17.3	28	590	3.11	1.82	0.82	1.31	0.83	1.23	41.4	73.7	82.9	2.961
		17.6	29	519	3.3	1.98	0.85	1.33	0.9	1.15	40.2	72.1	99.1	3.417
		17.6	31	725	3.32	1.98	0.86	1.31	0.91	1.26	40.5	72.5	102.2	3.297
		17.6	28	619	3.23	1.92	0.86	1.27	0.77	1.15	40.5	72.5	86.6	3.093
		17.6	27	581	3.4	1.93	0.8	1.18	0.82	1.16	43.2	75.4	93.3	3.456
		17.3	26	588	3.42	2.2	0.82	1.21	0.73	1.13	35.7	66.4	89	3.423
		17.3	28	646	3.33	1.89	0.76	1.31	0.75	1.19	43.2	75.6	81.9	2.925
		17	29	481	3.53	2.27	0.82	1.24	0.76	1.15	35.7	66.3	96.1	3.314
		17	34	547	3.74	2.41	0.74	1.25	0.9	1.17	35.6	65.9	111.2	3.271
		16.6	28	552	3.67	2.35	0.86	1.21	0.78	1.24	36	66.5	107.7	3.846
		16.6	28	574	3.54	2.28	0.8	1.24	0.74	1.17	35.6	66.2	93.1	3.325
		17.7	28	594	3.42	1.92	0.82	1.27	0.9	1.24	43.7	76	101.8	3.636
		17.7	28	568	3.34	1.89	0.76	1.22	0.71	1.16	43.5	75.8	80	2.857
		17.7	27	542	3.72	2.37	0.87	1.35	0.85	1.27	36.4	66.9	117.6	4.356
		17.6	31	561	3.86	2.37	0.86	1.4	0.8	1.17	38.6	69.6	119.4	3.852
		16.6	28	648	3.43	2.06	0.73	1.12	0.78	1.22	39.9	71.7	85.8	3.064
		16.6	27	574	3.44	2.2	0.7	1.15	0.78	1.15	36.1	66.9	84	3.111
		17.7	30	556	3.57	2	0.75	1.21	0.76	1.23	44.1	76.2	91.9	3.063
		17.7	31	581	3.28	2.1	0.82	1.08	0.89	1.17	36	66.9	95.1	3.068
		17.7	31	608	3.26	1.92	0.88	1.16	0.82	1.22	41.1	73.2	93.6	3.019
		17	29	686	3.25	1.97	0.8	1.08	0.98	1.25	39.4	71.2	98.7	3.403
		17	30	650	3.44	2.06	0.82	1.13	0.8	1.24	40	71.7	94.6	3.153
		17	29	582	3.48	2.02	0.77	1.17	0.88	1.29	42.1	74.1	99.4	3.428
		17.3	30	650	3.48	2.18	0.79	1.07	0.82	1.18	37.5	68.6	96.2	3.21
		17.3	34	580	3.16	1.92	0.76	1.09	0.87	1.22	39.3	71.2	83.5	2.46
		17.3	27	489	3.36	2.03	0.76	1.14	0.72	1.17	39.6	71.4	81.8	3.03
		17.3	31	596	3.41	2.01	0.74	1.16	0.77	1.19	41.1	73	85.7	2.77
		18	30	990	3.49	2.08	0.79	1.3	0.76	1.19	40.5	72.3	91.6	3.053
		16.6	32	630	3.44	2.07	0.88	1.29	0.76	1.21	39.9	71.6	97	3.031
		17.7	27	563	3.48	2.02	0.86	1.28	0.71	1.22	41.8	73.8	92.6	3.43
		17.7	31	640	3.27	1.8	0.92	1.33	0.82	1.17	44.8	77.3	97	3.129
		17.7	32	639	3.49	2.07	0.89	1.3	0.81	1.27	40.7	72.5	104.2	3.256
		17.7	31	636	3.4	2.1	0.93	1.29	0.86	1.24	38.2	69.6	107.8	3.477
		17.7	29	656	3.72	2.24	0.92	1.37	0.87	1.27	39.9	71.4	124.5	4.293
		17.7	33	623	3.6	2.15	0.92	1.38	0.95	1.29	40.3	72	125.5	3.803
		17.4	28	646	3.3	1.9	0.91	1.38	0.84	1.29	42.4	74.6	99.1	3.539
		17.4	27	638	2.95	1.67	0.86	1.38	0.8	1.21	43.4	76.1	77.2	2.859
		17.4	30	571	3.28	2.07	0.84	1.41	0.76	1.31	37	68.2	86.9	2.897
		17.4	28	643	2.99	1.67	0.86	1.43	0.9	1.28	44	76.8	86	3.071
		17.4	28	570	3.23	1.92	0.81	1.31	0.78	1.26	40.7	72.7	83.7	2.989
	Total	17.3581	29.2791	605.884	3.41395	2.0514	0.82093	1.2514	0.814651	1.21581	39.9907	71.6558	95.6605	3.27128
	SEM	0.0560051	0.298252	12.3043	0.0289731	0.0264294	0.00944656	0.0148845	0.0100791	0.0073229	0.401972	0.494211	1.80782	0.057336
	Palldfl/fl;Myh6Cre/+ 4M
		Age (weeks)	BW (g)	HR (bpm)	LVIDd (mm)	LVIDs (mm)	IVSd (mm)	IVSs (mm)	LVPWd (mm)	LVPWs (mm)	FS (%)	EF (%)	LVM (mg)	LVM/BW (mg/g)
		19.9	22	676	3.26	2.01	0.86	1.29	0.83	1.21	38.3	69.9	92.8	4.218
		19.9	21	741	3.24	1.94	0.79	1.27	0.72	1.15	40.2	72.2	78.3	3.729
		19.9	24	676	3.32	2.08	0.84	1.25	0.82	1.25	37.2	68.4	92.9	3.871
		19.9	22	670	3.39	2.1	0.74	1.21	0.67	1.22	38	69.3	77	3.5
		18	26	503	3.59	2.24	0.84	1.22	0.82	1.07	37.5	68.5	105.6	4.062
		18	27	701	3.33	2.06	0.82	1.18	0.79	1.19	38	69.5	89.9	3.33
		18	27	887	3.44	2.17	0.75	1.15	0.73	1.06	37	68.1	84.2	3.119
	Total	19.0857	24.1429	693.429	3.36714	2.08571	0.805714	1.22429	0.768571	1.16429	38.0286	69.4143	88.6714	3.68986
	SEM	0.383858	0.961858	42.8757	0.0454456	0.0374075	0.0177089	0.0187537	0.0234448	0.0281033	0.402796	0.525732	3.73782	0.149856
	Mypn-/- 4M
		Age (weeks)	BW (g)	HR (bpm)	LVIDd (mm)	LVIDs (mm)	IVSd (mm)	IVSs (mm)	LVPWd (mm)	LVPWs (mm)	FS (%)	EF (%)	LVM (mg)	LVM/BW (mg/g)
		18.1	24	522	4.02	2.79	0.78	1.29	0.76	1.15	30.5	58.5	115.5	4.813
		18.1	26	602	3.62	2.54	0.82	1.15	0.74	1.06	29.7	57.7	98.3	3.781
		18.1	25	525	3.88	2.59	1	1.37	0.84	1.27	33.3	62.7	137.3	5.492
		18.1	28	516	3.73	2.58	0.81	1.2	0.8	1.11	30.8	59.3	108.1	3.861
		18.1	25	536	3.87	2.65	0.76	1.18	0.8	1.13	31.6	60.2	110	4.4
		18.1	27	560	3.75	2.61	0.94	1.09	0.82	1.19	30.4	58.7	122.1	4.522
		17.3	26	585	3.86	2.65	0.79	1.2	0.79	1.19	31.2	59.7	111.2	4.277
		16.7	28	638	3.59	2.44	0.88	1.19	0.85	1.23	32.1	61.3	111.9	3.996
		18.9	26	557	4.03	2.88	0.77	1.24	0.86	1.03	28.6	55.6	124.1	4.773
		18.9	25	447	3.96	2.7	0.86	1.24	0.74	1.08	31.8	60.5	117.7	4.708
		18.9	27	606	3.82	2.77	0.8	1.09	0.89	0.97	27.4	54	119.6	4.43
		17.6	29	594	3.81	2.57	0.79	1.26	0.81	1.15	32.6	61.7	110.8	3.821
		17.6	27	579	4.22	2.97	0.71	1.09	0.82	1.11	29.7	57.2	124.1	4.596
		17.6	29	541	4.49	3.22	0.74	1.16	0.94	1.3	28.3	54.7	156.5	5.397
		17.1	26	443	4.01	2.95	0.86	1.16	0.94	1.25	26.6	52.6	140.8	5.415
		17.1	26	505	4.12	3	0.79	1.04	0.76	1.05	27.2	53.4	121.8	4.685
		17.1	25	506	3.64	2.47	0.69	1.08	0.88	1.15	32.2	61.4	100.1	4.004
		17.1	29	613	3.8	2.67	0.77	1.11	0.88	1.24	29.8	57.7	115.4	3.979
		17.4	27	624	3.7	2.61	0.84	1.18	0.79	1.09	29.3	57	107.8	3.993
		17.4	27	565	3.88	2.71	0.84	1.22	0.8	1.16	30.3	58.3	117.6	4.356
		18.1	28	623	3.88	2.7	0.89	1.19	0.8	1.11	30.4	58.5	122.7	4.382
		16.1	25	510	3.74	2.58	0.86	1.17	0.82	1.14	30.9	59.4	114.6	4.584
		16.1	25	613	3.88	2.75	0.86	1.14	0.81	1.19	29.1	56.6	121.1	4.844
		17.4	29	546	4.29	2.99	0.95	1.25	0.89	1.19	30.2	57.8	162.5	5.603
		17.4	26	628	3.76	2.8	0.83	1.15	0.85	1.11	25.6	51.1	115.9	4.458
		17.4	26	579	3.58	2.46	0.9	1.23	0.86	1.24	31.4	60.2	114.3	4.396
		17.4	22	555	3.55	2.29	0.86	1.4	0.82	1.26	35.5	66	104.8	4.764
	Total	17.6	26.4074	559.926	3.86963	2.70148	0.829259	1.18778	0.828148	1.1537	30.2407	58.2148	119.504	4.53074
	SEM	0.138469	0.325809	10.09	0.0431207	0.0393961	0.0138153	0.0160868	0.010198	0.0154712	0.41142	0.630351	2.86464	0.0984096
	Mypn-/-/Palldfl/fl 4M
		Age (weeks)	BW (g)	HR (bpm)	LVIDd (mm)	LVIDs (mm)	IVSd (mm)	IVSs (mm)	LVPWd (mm)	LVPWs (mm)	FS (%)	EF (%)	LVM (mg)	LVM/BW (mg/g)
		16.1	29	449	3.55	2.3	0.89	1.25	0.75	1.13	35.3	65.7	102	3.517
		16.1	25	599	3.4	2.14	0.82	1.17	0.79	1.18	37.1	68.2	92.3	3.692
		17.6	31	624	3.96	2.75	0.8	1.25	0.81	1.19	30.5	58.5	119.7	3.861
		17.6	33	593	3.86	2.61	0.86	1.27	0.75	1.2	32.3	61.3	113.7	3.445
		17.6	31	560	4.05	2.69	0.86	1.23	0.81	1.25	33.6	62.9	129.5	4.177
		21.1	35	496	3.66	2.66	0.86	1.27	0.9	1.31	27.2	53.9	117.2	3.349
	Total	17.6833	30.6667	553.5	3.74667	2.525	0.848333	1.24	0.801667	1.21	32.6667	61.75	112.4	3.6735
	SEM	0.746287	1.40633	27.6101	0.102751	0.100358	0.0132707	0.0152753	0.0225709	0.0254296	1.4396	2.08898	5.42402	0.125302
	Mypn-/-/Palldfl/fl;Myh6Cre/+ 4M
		Age (weeks)	BW (g)	HR (bpm)	LVIDd (mm)	LVIDs (mm)	IVSd (mm)	IVSs (mm)	LVPWd (mm)	LVPWs (mm)	FS (%)	EF (%)	LVM (mg)	LVM/BW (mg/g)
		16.1	29	540	3.5	2.55	0.86	1.08	0.68	1.07	26.9	53.6	90.9	3.134
		17.6	30	643	3.77	2.37	0.72	1.17	0.72	1.15	37.1	67.9	95.4	3.18
		17.6	29	607	3.29	2.02	0.92	1.2	0.8	1.25	38.5	70.1	95.9	3.307
		21.1	32	509	4	2.92	0.83	1.15	0.93	1.17	27	53.2	136.6	4.269
		21.1	31	566	3.69	2.63	0.88	1.23	0.89	1.17	28.6	56	120.8	3.897
		21.1	36	514	3.83	2.7	0.75	1.2	0.91	1.21	29.5	57.1	117.4	3.261
		21.1	29	409	3.86	2.87	0.88	1.21	0.84	0.98	25.8	51.4	124.9	4.307
	Total	19.3857	30.8571	541.143	3.70571	2.58	0.834286	1.17714	0.824286	1.14286	30.4857	58.4714	111.7	3.62214
	SEM	0.829925	0.961858	28.6867	0.0906815	0.117027	0.0277624	0.018988	0.0363093	0.0342758	1.94856	2.81845	6.65031	0.19679
