# Supplementary material for: Ablation of palladin in adult heart causes dilated cardiomyopathy associated with intercalated disc abnormalities
Source: eLife. 2023 Mar 16;12:e78629. doi: 10.7554/eLife.78629 (PMC10069870; doi:10.7554/eLife.78629)
Supplement: Figure 3—figure supplement 1—source data 2. [file elife-78629-fig3-figsupp1-data2.xlsx]

## Sheet: Figure 3–figure supplement 1
Figure 3–figure supplement 1–source data 2. Echocardiographic analysis on cardiomyocyte-specific palladin knockout (cPKO) and control male mice 8 weeks after tamoxifen (TAM) injection.
	Myh6Cre/+ TAM
		Age (wks)	BW (g)	HR (bpm)	LVIDd (mm)	LVIDs (mm)	IVSd (mm)	IVSs (mm)	LVPWd (mm)	LVPWs (mm)	FS (%)	EF (%)	LVM (mg)	LVM/BW (mg/g)
		20.1429	25	619	3.31	2.04	0.68	1.07	0.79	1.15	38.5	70	78.7	31.48
		20.1429	26	592	3.54	1.95	0.78	1.23	0.78	1.19	44.8	77.1	94.7	36.42
		20.1429	33	554	3.74	2.25	0.82	1.19	0.83	1.14	39.8	71.2	112.4	34.06
		19.9	27	559	3.5	2.25	0.88	1.25	0.96	1.31	35.7	66.2	117.3	43.44
		19.9	27	616	3.38	2.16	0.87	1.29	0.82	1.11	36	66.8	98.4	36.44
		19.9	21	741	3.24	1.94	0.79	1.27	0.72	1.15	40.2	72.2	78.3	37.29
		19.9	24	676	3.32	2.08	0.84	1.25	0.82	1.25	37.2	68.4	92.9	38.71
	Total	20.0041	26.1429	622.429	3.43286	2.09571	0.808571	1.22143	0.817143	1.18571	38.8857	70.2714	96.1	36.8343
	SEM	0.0490646	1.3875	25.1726	0.0651268	0.0489342	0.0256746	0.0278968	0.0276642	0.0267134	1.18531	1.40927	5.67413	1.41466
	Palldfl/fl;Myh6Cre/+ TAM
		Age (weeks)	BW (g)	HR (bpm)	LVIDd (mm)	LVIDs (mm)	IVSd (mm)	IVSs (mm)	LVPWd (mm)	LVPWs (mm)	FS (%)	EF (%)	LVM (mg)	LVM/BW (mg/g)
		19.9	22	676	3.26	2.01	0.86	1.29	0.83	1.21	38.3	69.9	92.8	42.18
		19.9	21	741	3.24	1.94	0.79	1.27	0.72	1.15	40.2	72.2	78.3	37.29
		19.9	24	676	3.32	2.08	0.84	1.25	0.82	1.25	37.2	68.4	92.9	38.71
		19.9	22	670	3.39	2.1	0.74	1.21	0.67	1.22	38	69.3	77	35
		18	26	503	3.59	2.24	0.84	1.22	0.82	1.07	37.5	68.5	105.6	40.62
		18	27	701	3.33	2.06	0.82	1.18	0.79	1.19	38	69.5	89.9	33.3
		18	27	887	3.44	2.17	0.75	1.15	0.73	1.06	37	68.1	84.2	31.19
	Total	19.0857	24.1429	693.429	3.36714	2.08571	0.805714	1.22429	0.768571	1.16429	38.0286	69.4143	88.6714	36.8986
	SEM	0.383858	0.961858	42.8757	0.0454456	0.0374075	0.0177089	0.0187537	0.0234448	0.0281033	0.402796	0.525732	3.73782	1.49856
