# Supplementary material for: Ablation of palladin in adult heart causes dilated cardiomyopathy associated with intercalated disc abnormalities
Source: eLife. 2023 Mar 16;12:e78629. doi: 10.7554/eLife.78629 (PMC10069870; doi:10.7554/eLife.78629)
Supplement: Figure 3—figure supplement 2—source data 1. [file elife-78629-fig3-figsupp2-data1.xlsx]

## Sheet: Figure 3–figure supplement 2
Figure 3–figure supplement 2–source data 1. Data for sarcomere-length tension relationship in cardiac myofibrils from the left ventricle of inducible cardiomyocyte-specific palladin knockout (cPKOi) and control male mice 8 weeks after tamoxifen (TAM) induction.
	Palldfl/fl				Myh6MCM/+				Palldfl/fl;Myh6MCM/+
	SL (μm)	SEM SL (μm)	RT (mN mm-2)	SEM RT (mN mm-2)	SL (μm)	SEM SL (μm)	RT (mN mm-2)	SEM RT (mN mm-2)	SL (μm)	SEM SL (μm)	RT (mN mm-2)	SEM RT (mN mm-2)
	1.79	0.04	0	0	1.83	0.02	0	0	1.82	0.03	0	0
	2.04	0.01	5.09	0.94	2.05	0.01	5.14	1.16	2.04	0.02	5.23	0.7
	2.13	0.01	10.31	1.64	2.14	0.01	11.09	2.16	2.16	0.01	8.98	1.51
	2.25	0.01	20.74	2.38	2.23	0.01	18.15	2.97	2.25	0.01	17.44	1.76
	2.36	0.01	26.53	3.81	2.34	0.01	28.66	2.52	2.34	0.01	20.8	5.21
	2.44	0.01	36.4	4.83	2.44	0.01	33.81	4.73	2.45	0.01	27.41	2.28
	2.56	0.02	54.13	4.03	2.54	0.01	48.44	5.27	2.54	0.01	31.34	7.62
	2.64	0.02	61.11	7.15	2.67	0.01	53.15	6.65	2.64	0.02	37.14	1.72
