# Supplementary material for: Ablation of palladin in adult heart causes dilated cardiomyopathy associated with intercalated disc abnormalities
Source: eLife. 2023 Mar 16;12:e78629. doi: 10.7554/eLife.78629 (PMC10069870; doi:10.7554/eLife.78629)
Supplement: Figure 3—source data 1. [file elife-78629-fig3-data1.xlsx]

## Sheet: Figure 3A, C
Figure 3–source data 1. Quantitative real-time PCR (qRT-PCR) and densitometry of Western blots on inducible cardiomyocyte-specific palladin (cPKOi) and control male mice.
A	qRT-PCR
		Palld (fold change)
	Palldfl/fl TAM	200 kDa	140 kDa	90 kDa
		0.97	1.22	1.22
		1.23	1.05	0.99
		0.98	1.05	1.09
		0.82	0.67	0.69
	Average	1	0.9975	0.9975
	SEM	0.084951	0.116288	0.112796
	Palldfl/fl;Myh6MCM/+ TAM	200 kDa	140 kDa	90 kDa
		0.25	0.16	0.21
		0.23	0.18	0.15
		0.2		0.23
		0.12		0.22
	Average	0.2	0.17	0.2025
	SEM	0.0285774	0.01	0.0179699
C	Western blot densitometry
		PALLD 90 kDa isoform (fold change)
		Myh6MCM/+ TAM	Palldfl/fl;Myh6MCM/+ TAM
		0.93	0.12
		1.35	0.15
		1.46	0.2
		0.75	0.11
		0.86	0.21
		0.91	0.15
		0.73
	Average	0.998571	0.156667
	SEM	0.109336	0.0166667
