# Supplementary material for: Ablation of palladin in adult heart causes dilated cardiomyopathy associated with intercalated disc abnormalities
Source: eLife. 2023 Mar 16;12:e78629. doi: 10.7554/eLife.78629 (PMC10069870; doi:10.7554/eLife.78629)
Supplement: Figure 3—source data 4. [file elife-78629-fig3-data4.xlsx]

## Sheet: Figure 3D
Figure 3–source data 4. Echocardiographic analysis on inducible cardiomyocyte-specific palladin (cPKOi) and control male mice 8 and 24 weeks after tamoxifen (TAM) induction.
D	Palldfl/fl Basal
		Age (weeks)	BW (g)	HR (bpm)	LVIDd (mm)	LVIDs (mm)	IVSd (mm)	IVSs (mm)	LVPWd (mm)	LVPWs (mm)	FS (%)	EF (%)	RWT
		7	24	457	3.48	1.98	0.79	1.23	0.77	1.27	42.9	75.1	0.448276
		6.9	19	576	3.13	1.82	0.74	1.16	0.82	1.15	41.7	74.1	0.498403
		6.9	16	597	3.02	1.71	0.76	1.19	0.76	1.2	43.5	76.2	0.503311
		6.7	19	452	3.42	1.97	0.8	1.24	0.64	1.26	42.5	74.7	0.421053
		6.7	17	476	3.37	1.84	0.74	1.17	0.64	1.16	45.5	77.9	0.409496
		6.7	18	566	3.04	1.8	0.74	1.25	0.82	1.19	40.8	73.2	0.513158
		6.1	22	613	3.27	1.63	0.8	1.37	0.78	1.27	50.1	82.5	0.48318
		6.7	22	559	3.12	1.86	0.8	1.36	0.92	1.27	40.4	72.6	0.551282
		7	24	540	3.38	1.96	0.82	1.25	0.87	1.25	42.2	74.3	0.5
		6	21	488	3.41	2.09	0.78	1.19	0.77	1.26	38.7	70.2	0.454545
		5.9	22	540	3.5	2.21	0.85	1.41	0.81	1.14	36.8	67.7	0.474286
		6	24	622	3.5	2.1	0.81	1.31	0.86	1.28	40.2	71.9	0.477143
		5.9	21	545	3.2	1.88	0.76	1.19	0.86	1.28	41.1	73.3	0.50625
		6.7	22	389	3.44	2.06	0.75	1.2	0.79	1.06	40.2	71.9	0.447674
		6.7	25	529	3.41	1.85	0.86	1.28	0.83	1.38	45.8	78.2	0.495601
		6	23	575	3.35	1.87	0.84	1.2	0.85	1.21	44.2	76.6	0.504478
	Total	6.49375	21.1875	532.75	3.315	1.91438	0.79	1.25	0.799375	1.22687	42.2875	74.4	0.480508
	SEM	0.105857	0.672178	16.1244	0.0407738	0.037848	0.00991632	0.0190832	0.018918	0.0188794	0.786547	0.870776	0.00917106
	Myh6MCM/+ Basal
		Age (weeks)	BW (g)	HR (bpm)	LVIDd (mm)	LVIDs (mm)	IVSd (mm)	IVSs (mm)	LVPWd (mm)	LVPWs (mm)	FS (%)	EF (%)	RWT
		7.1	24	485	3.38	2.05	0.72	1.12	0.81	1.26	39.4	71.1	0.452663
		6.7	18	543	3.36	2.08	0.74	1.04	0.69	1.22	38.1	69.6	0.425595
		6.7	18	454	3.3	1.96	0.73	1.22	0.69	1.14	40.8	72.8	0.430303
		6.7	21	556	3.38	1.91	0.74	1.27	0.71	1.22	43.4	75.7	0.428994
		6.6	19	441	3.28	2.09	0.78	1.15	0.69	1.2	36.2	67.2	0.448171
		6.4	18	517	3.13	1.88	0.74	1.19	0.78	1.13	39.7	71.7	0.485623
		6.4	20	459	3.34	2.02	0.7	0.99	0.72	1.25	39.6	71.3	0.42515
		6.7	17	563	3.49	2.08	0.73	1.08	0.79	1.25	40.5	72.3	0.43553
		6	18	622	3.4	1.83	0.75	1.22	0.76	1.28	46.1	78.5	0.444118
		6	17	644	3	1.57	0.81	1.22	0.73	1.27	47.7	80.5	0.513333
		5.9	22	421	3.63	2.33	0.73	1.09	0.77	1.22	35.8	66.3	0.413223
		6	20	596	3.29	1.89	0.77	1.21	0.74	1.29	42.5	74.8	0.458967
		6.7	21	737	3.31	2.04	0.74	1.31	0.81	1.22	38.5	70	0.468278
		6.9	22	659	3.4	1.94	0.75	1.22	0.77	1.23	43	75.2	0.447059
		6.7	23	624	3.68	2.32	0.78	1.24	0.8	1.18	37	67.8	0.429348
		6.9	24	569	3.84	2.45	0.76	1.3	0.8	1.15	36.2	66.5	0.40625
		6.7	20	525	3.53	2.18	0.66	1.25	0.72	1.09	38.2	69.4	0.390935
		7.4	21	458	3.56	2.07	0.72	1.2	0.67	1.17	41.9	73.8	0.390449
		7.4	23	575	3.35	2.1	0.75	1.15	0.8	1.26	37.2	68.4	0.462687
	Total	6.62632	20.3158	549.895	3.40263	2.04158	0.742105	1.18263	0.75	1.21211	40.0947	71.7316	0.439825
	SEM	0.0999538	0.524558	19.5059	0.0439753	0.0454752	0.0073976	0.0198509	0.0107061	0.0127637	0.766074	0.909921	0.00703416
	Palldfl/fl;Myh6MCM/+ Basal
		Age (weeks)	BW (g)	HR (bpm)	LVIDd (mm)	LVIDs (mm)	IVSd (mm)	IVSs (mm)	LVPWd (mm)	LVPWs (mm)	FS (%)	EF (%)	RWT
		6.9	17	452	3.4	2.02	0.79	1.33	0.8	1.19	40.4	72.3	0.467647
		7	21	563	3.36	1.92	0.82	1.27	0.7	1.19	42.7	74.9	0.452381
		6.9	22	530	3.34	1.98	0.78	1.23	0.78	1.23	40.8	72.7	0.467066
		6.7	18	519	3.07	1.86	0.78	1.09	0.74	1.09	39.2	71.2	0.495114
		6.7	20	565	3.32	2.04	0.8	1.23	0.66	1.17	38.4	69.9	0.439759
		6.9	22	539	3.02	1.82	0.86	1.28	1.04	1.33	39.8	71.9	0.629139
		6.7	20	543	3.17	1.73	0.74	1.18	0.8	1.17	45.4	78	0.485804
		6.3	21	367	3.01	1.71	0.77	1.21	0.77	1.23	43.3	76	0.511628
		6	20	503	3.48	2.1	0.84	1.27	0.7	1.16	39.6	71.2	0.442529
		7	22	530	3.21	2	0.82	1.16	0.8	1.24	37.7	69.2	0.504673
		6	21	589	3.41	1.99	0.85	1.24	0.83	1.27	41.7	73.8	0.492669
		6	20	341	3.84	2.3	0.73	1.28	0.78	1.18	40.2	71.5	0.393229
		5.9	21	657	3.21	1.84	0.74	1.25	0.81	1.32	42.6	74.9	0.482866
		6	22	596	3.35	2.15	0.76	1.13	0.84	1.35	35.8	66.6	0.477612
		6.7	22	420	3.94	2.53	0.82	1.37	0.7	1.14	35.9	66	0.385787
		6.7	22	546	3.59	2.18	0.8	1.11	0.76	1.29	39.4	70.8	0.43454
		6.7	23	585	3.34	1.96	0.81	1.16	0.8	1.27	41.5	73.6	0.482036
		7	24	636	3.32	1.76	0.77	1.28	0.8	1.27	47	79.5	0.472892
		6.7	22	561	3.5	1.92	0.68	1.22	0.73	1.35	45.3	77.6	0.402857
		7.3	24	617	3.32	2.05	0.68	1.18	0.82	1.24	38.3	69.8	0.451807
		7.3	20	542	3.28	1.87	0.71	1.17	0.57	1.05	42.9	75.3	0.390244
		7.3	21	545	3.38	2.12	0.77	1.19	0.68	1.09	37.1	68.3	0.428994
	Total	6.66818	21.1364	533.909	3.35727	1.99318	0.778182	1.21955	0.768636	1.21909	40.6818	72.5	0.46324
	SEM	0.0954339	0.356118	16.8347	0.0482022	0.0410278	0.0106831	0.0149237	0.0190499	0.0180417	0.64155	0.760383	0.0112185
	Palldfl/fl TAM 8W
		Age (weeks)	BW (g)	HR (bpm)	LVIDd (mm)	LVIDs (mm)	IVSd (mm)	IVSs (mm)	LVPWd (mm)	LVPWs (mm)	FS (%)	EF (%)	RWT
		17	27	558	3.7	2.42	0.81	1.23	0.77	1.28	34.8	64.8	0.427027
		17	26	367	3.74	2.31	0.83	1.33	0.82	1.14	38.2	69.2	0.441176
		17	26	561	3.42	1.95	0.87	1.27	0.72	1.22	43	75.2	0.464912
		17	30	518	3.47	2.18	0.76	1.17	0.85	1.21	37.2	68.3	0.463977
		16.9	27	635	3.54	2.08	0.86	1.29	0.8	1.29	41.1	72.9	0.468927
		15.4	34	530	3.79	2.2	0.86	1.36	0.76	1.18	42	73.8	0.427441
		16.3	28	596	3.64	2.31	0.82	1.29	0.84	1.26	36.6	67.3	0.456044
		16.3	25	527	3.27	1.88	0.87	1.31	0.87	1.24	42.4	74.7	0.53211
		15.3	31	480	3.35	2.06	0.87	1.23	0.82	1.16	38.6	70.2	0.504478
		18.3	28	446	3.58	2.19	0.89	1.24	0.78	1.21	38.8	70.1	0.46648
		17.3	28	493	3.74	2.25	0.79	1.27	0.9	1.22	39.8	71.2	0.451872
		17.3	30	553	3.3	2.1	0.81	1.14	0.69	1.27	36.6	67.7	0.454545
		18	25	587	3.35	1.97	0.86	1.17	0.77	1.21	41.2	73.2	0.486567
		16.4	28	551	3.73	2.4	0.92	1.3	0.87	1.35	35.8	66.1	0.479893
		16.4	27	539	3.62	2.34	0.91	1.24	0.81	1.23	35.3	65.6	0.475138
		15.7	22	492	3.7	2.43	0.81	1.19	0.86	1.28	34.3	64.2	0.451351
		16.9	31	591	3.8	2.34	0.94	1.32	0.88	1.34	38.6	69.6	0.478947
		17.6	32	536	3.46	2.07	0.82	1.24	0.8	1.23	40.2	72	0.468208
		17.6	36	549	3.61	2.21	0.85	1.18	0.76	1.1	38.8	70.1	0.445983
		17.3	30	517	3.46	2.17	0.79	1.27	0.82	1.25	37.4	68.5	0.465318
		17.3	35	591	3.58	2.3	1	1.25	0.76	1.13	35.7	66.2	0.49162
		17.3	30	614	3.47	2.12	0.88	1.21	0.76	1.23	39	70.5	0.472622
		17	31	481	3.38	1.88	0.74	1.2	0.7	1.13	44.4	76.8	0.426036
		14.6	32	581	3.16	1.88	0.84	1.19	0.86	1.27	40.3	72.4	0.537975
		25.4	34	657	3.81	2.45	0.82	1.35	0.76	1.29	35.8	66	0.414698
		21.1	31	617	3.5	2.03	0.88	1.39	0.8	1.31	41.9	73.9	0.48
		68.6	28	625	3.5	2.22	0.84	1.21	0.76	1.28	36.4	67.2	0.457143
		68.6	27	643	3.64	2.42	0.78	1.02	0.91	1.23	33.7	63.4	0.464286
		16.7	31	560	3.72	2.37	0.72	1.17	0.76	1.19	36.4	66.9	0.397849
		14.6	32	581	3.16	1.88	0.84	1.19	0.86	1.27	40.3	72.4	0.537975
	Total	20.6067	29.4	552.533	3.53967	2.18033	0.842667	1.24067	0.804	1.23333	38.4867	69.68	0.466353
	SEM	2.40846	0.588393	11.4643	0.0338098	0.0333649	0.0107097	0.0138791	0.0105001	0.0111863	0.509332	0.646021	0.00602799
	Myh6MCM/+ TAM 8W
		Age (weeks)	BW (g)	HR (bpm)	LVIDd (mm)	LVIDs (mm)	IVSd (mm)	IVSs (mm)	LVPWd (mm)	LVPWs (mm)	FS (%)	EF (%)	RWT
		17.3	29	587	3.54	2.14	0.86	1.29	1.03	1.35	39.7	71.3	0.533898
		16.9	28	552	3.55	2.13	0.8	1.27	0.82	1.29	40	71.6	0.456338
		16.7	27	565	3.48	2.17	0.86	1.16	0.78	1.22	37.7	68.9	0.471264
		16.7	30	567	3.73	2.44	0.88	1.22	0.92	1.23	34.5	64.5	0.482574
		16.7	26	515	3.59	2.39	0.82	1.17	0.97	1.34	33.5	63.2	0.498607
		16.9	27	539	3.63	2.3	0.88	1.19	0.86	1.21	36.6	67.3	0.479339
		16.7	30	555	3.76	2.42	0.85	1.17	0.75	1.23	35.7	66	0.425532
		16.7	37	674	3.72	2.28	0.83	1.27	0.82	1.23	38.6	69.8	0.443548
		17.4	28	647	3.76	2.55	0.85	1.17	0.82	1.23	32.3	61.3	0.444149
		16	26	659	3.52	2.29	0.81	1.19	0.87	1.23	35	65.4	0.477273
		17.6	28	644	3.47	2.14	0.77	1.06	0.72	1.19	38.2	69.6	0.429395
		17.4	31	570	3.5	2.24	0.81	1.25	0.78	1.21	36.2	66.9	0.454286
		17.4	27	676	3.71	2.31	0.75	1.22	0.82	1.24	37.7	68.7	0.423181
		17.7	27	540	3.42	2.06	0.9	1.18	0.86	1.27	39.6	71.3	0.51462
		17.7	26	532	3.57	2.17	0.8	1.17	0.86	1.2	39.2	70.7	0.464986
		17.7	29	583	3.62	2.25	0.77	1.21	0.8	1.21	37.8	68.9	0.433702
		17.4	28	595	3.66	2.27	0.72	1.18	0.78	1.18	37.8	68.8	0.409836
		17.4	27	656	3.56	2.14	0.86	1.13	0.66	1.19	39.9	71.4	0.426966
		17.6	24	592	3.25	2.01	0.78	1.18	0.81	1.14	38.2	69.7	0.489231
		17.1	29	519	3.32	2.07	0.81	1.19	0.76	1.19	37.7	69.1	0.472892
		17.6	29	582	3.58	2.22	0.82	1.19	0.71	1.19	37.8	69	0.427374
		17	30	620	3.74	2.36	0.9	1.28	0.72	1.23	37	67.7	0.433155
		16.6	26	595	3.44	2.16	0.82	1.24	0.76	1.18	37.2	68.3	0.459302
		16.6	29	540	3.3	1.87	0.81	1.27	0.93	1.22	43.4	75.7	0.527273
		17.6	31	592	3.89	2.51	0.84	1.15	0.87	1.12	35.5	65.6	0.439589
	Total	17.136	28.36	587.84	3.5724	2.2356	0.824	1.2	0.8192	1.2208	37.472	68.428	0.460732
	SEM	0.0925347	0.4996	9.70836	0.0313543	0.0316548	0.00907377	0.0106458	0.017009	0.0102943	0.465278	0.60626	0.00675168
	Palldfl/fl;Myh6MCM/+ 8W
		Age (weeks)	BW (g)	HR (bpm)	LVIDd (mm)	LVIDs (mm)	IVSd (mm)	IVSs (mm)	LVPWd (mm)	LVPWs (mm)	FS (%)	EF (%)	RWT
		15.3	29	528	3.8	2.55	0.72	1.23	0.76	1.19	32.7	61.9	0.389474
		15.3	29	519	3.37	2.05	0.88	1.31	0.95	1.17	39.2	70.8	0.543027
		15.3	31	470	3.55	2.26	0.91	1.33	1.07	1.33	36.4	67.2	0.557746
		15.3	29	520	3.52	2.25	0.87	1.28	0.83	1.21	35.9	66.5	0.482955
		19.3	28	610	3.58	2.35	0.86	1.34	0.88	1.13	34.3	64.3	0.486034
		14.9	26	532	3.7	2.28	0.76	1.26	0.72	1.18	38.5	69.7	0.4
		14.9	29	505	3.67	2.26	0.8	1.25	0.76	1.31	38.5	69.7	0.425068
	Total	15.7571	28.7143	526.286	3.59857	2.28571	0.828571	1.28571	0.852857	1.21714	36.5	67.1571	0.469186
	SEM	0.594762	0.565445	16.004	0.0527992	0.0560976	0.026406	0.0158651	0.0469911	0.0281758	0.912088	1.21926	0.0252869
	Palldfl/fl;Myh6MCM/+ TAM 8W
		Age (weeks)	BW (g)	HR (bpm)	LVIDd (mm)	LVIDs (mm)	IVSd (mm)	IVSs (mm)	LVPWd (mm)	LVPWs (mm)	FS (%)	EF (%)	RWT
		16.4	30	491	4.49	3.03	0.88	1.3	0.81	1.22	32.6	61.1	0.376392
		16.9	26	576	3.71	2.5	0.92	1.24	0.87	1.1	32.7	62	0.48248
		17	32	615	3.48	2.38	0.84	1.26	0.89	1.25	31.6	60.7	0.497126
		17	28	619	4.03	2.74	0.91	1.31	0.82	1.04	32	60.6	0.42928
		17	25	466	3.95	2.76	0.92	1.21	0.76	1.19	30.1	58	0.425316
		16.9	29	510	3.84	2.59	0.9	1.23	0.94	1.35	32.5	61.5	0.479167
		15.4	35	515	3.85	2.75	0.98	1.42	1.09	1.35	28.6	55.7	0.537662
		16.3	26	444	3.86	2.68	0.76	1.19	0.97	1.27	30.5	58.6	0.448187
		18.3	24	527	3.81	2.71	0.84	1.12	0.69	1.05	28.9	56.2	0.401575
		17.3	38	541	4.12	3	0.92	1.2	0.9	1.33	27.2	53.4	0.441748
		16.4	26	569	3.52	2.57	0.87	1.13	0.86	1.27	27.1	53.8	0.491477
		18	29	471	4.15	2.95	0.78	1.15	0.82	1.1	28.9	56	0.385542
		16.4	27	543	3.82	2.69	0.97	1.21	0.86	1.08	29.4	57	0.479058
		16.4	31	542	4.37	3.09	0.94	1.27	0.9	1.18	29.2	56.2	0.421053
		16.9	29	675	3.92	2.87	1	1.33	0.9	1.22	26.6	52.7	0.484694
		16.9	28	608	4.05	2.99	0.93	1.25	0.83	1.15	26.2	51.9	0.434568
		15.7	24	610	3.19	2.08	0.88	1.29	0.92	1.17	34.6	65.1	0.564263
		15.7	22	532	3.48	2.22	0.9	1.27	0.86	1.26	36.4	67.2	0.505747
		16.9	28	606	3.89	2.69	1.01	1.27	0.86	1.36	30.9	59.2	0.48072
		17.9	33	593	3.92	2.74	0.86	1.22	0.88	1.21	30.1	58	0.443878
		17.9	30	517	4.21	3.13	0.78	1.17	0.8	1.11	25.7	50.9	0.375297
		17.9	30	536	4.01	3.01	0.77	1.12	0.72	1.04	24.8	49.7	0.371571
		17.3	34	656	3.99	2.9	0.94	1.31	0.79	1.24	27.4	53.8	0.433584
		17.3	35	514	4.24	3.23	0.83	1.19	0.7	1.08	23.8	47.8	0.360849
		17	29	547	4.14	3.15	0.73	1.08	0.74	1.15	24	48.3	0.355072
		17	29	518	3.59	2.54	0.86	1.21	0.73	1.16	29.2	57	0.442897
		17	31	522	3.88	2.77	0.88	1.17	0.74	1.17	28.6	55.8	0.417526
		16.3	35	547	3.65	2.55	0.86	1.33	0.9	1.36	30	58.1	0.482192
		16.3	34	534	4.01	2.78	0.78	1.22	0.76	1.18	30.7	58.9	0.38404
		16.3	35	535	4.08	2.81	0.81	1.25	0.82	1.15	31.1	59.3	0.39951
		14.6	30	529	3.76	2.77	0.82	1.08	0.8	1.07	26.1	52.1	0.430851
		17	29	653	3.72	2.6	0.79	1.24	0.7	1.19	30.1	58.2	0.400538
		16.7	32	486	4.1	2.81	0.82	1.22	0.83	1.18	31.4	59.7	0.402439
		16.4	27	447	3.97	2.87	0.74	1.23	0.86	1.06	27.7	54.3	0.403023
		16.4	27	565	3.68	2.48	0.84	1.26	0.76	1.09	32.5	61.7	0.434783
		25.4	33	501	4.61	3.47	0.78	1.19	0.7	0.93	24.6	48.9	0.321041
		21.1	33	632	3.99	2.67	0.8	1.25	0.79	1.19	33.1	62.2	0.398496
		16.4	29	495	3.59	2.82	0.92	1.19	0.74	1.02	21.4	44.4	0.462396
		15.1	30	451	4.15	2.98	0.82	1.22	0.7	1.09	28.3	55.1	0.366265
		15.1	29	505	3.97	2.84	0.8	1.25	0.75	1.02	28.5	55.6	0.390428
		15.1	32	439	3.98	2.87	0.9	1.21	0.88	1.06	28	54.8	0.447236
		82.2857	28	604	3.97	2.94	0.91	1.22	0.88	1.15	26	51.7	0.450882
		88	27	643	3.58	2.59	0.87	1.04	0.77	1.14	27.8	54.8	0.458101
		86.4286	25	630	3.48	2.47	0.87	1.1	0.86	1.2	29.1	57	0.497126
	Total	21.6367	29.6136	546.795	3.90455	2.77455	0.862045	1.21864	0.821591	1.16318	29	56.25	0.434002
	SEM	2.65109	0.526483	9.34982	0.042301	0.0392591	0.010493	0.0111524	0.0127172	0.0152317	0.45805	0.706423	0.00774099
	Palldfl/fl TAM 24W
		Age (weeks)	BW (g)	HR (bpm)	LVIDd (mm)	LVIDs (mm)	IVSd (mm)	IVSs (mm)	LVPWd (mm)	LVPWs (mm)	FS (%)	EF (%)	RWT
		32.1	27	657	3.2	1.89	0.79	1.25	0.88	1.1	40.9	73	0.521875
		32	29	563	3.56	2.18	0.81	1.34	0.8	1.11	38.7	70.1	0.452247
		32	36	577	3.66	2.33	0.76	1.21	0.78	1.36	36.3	66.9	0.420765
		32	34	585	3.75	2.34	0.91	1.24	0.88	1.22	37.5	68.4	0.477333
		31.3	37	681	3.66	2.24	0.87	1.23	0.74	1.3	38.7	69.9	0.439891
		32	29	632	3.59	2.22	0.84	1.21	0.82	1.27	38.3	69.5	0.462396
		31.4	31	496	3.63	2.32	0.83	1.15	0.83	1.23	36.2	66.8	0.4573
		31.4	31	577	3.58	2.19	0.74	1.23	0.8	1.23	38.9	70.2	0.430168
		30.4	35	568	3.46	2.06	0.86	1.42	0.85	1.23	40.4	72.2	0.49422
	Total	31.6222	32.1111	592.889	3.56556	2.19667	0.823333	1.25333	0.82	1.22778	38.4333	69.6667	0.461799
	SEM	0.186173	1.17195	18.5857	0.0529179	0.0484481	0.0181046	0.0266145	0.0153659	0.0275771	0.536708	0.702772	0.0106573
	Myh6MCM/+ TAM 24W
		Age (weeks)	BW (g)	HR (bpm)	LVIDd (mm)	LVIDs (mm)	IVSd (mm)	IVSs (mm)	LVPWd (mm)	LVPWs (mm)	FS (%)	EF (%)	RWT
		32.4	34	635	3.66	2.28	0.82	1.18	0.88	1.23	37.5	68.5	0.464481
		31.9	29	560	3.56	2.21	0.74	1.21	0.71	1.07	38	69.2	0.407303
		31.9	30	580	3.53	2.32	0.86	1.35	0.83	1.35	34.4	64.5	0.478754
		31.1	31	501	3.66	2.24	0.8	1.26	0.79	1.24	38.9	70.2	0.434426
		31.7	31	600	3.67	2.37	0.83	1.27	0.92	1.19	35.4	65.8	0.476839
	Total	31.8	31	575.2	3.616	2.284	0.81	1.254	0.826	1.216	36.84	67.64	0.452361
	SEM	0.209762	0.83666	22.3056	0.0294279	0.0283901	0.02	0.0290861	0.0364143	0.0451221	0.838212	1.07173	0.013774
	Palldfl/fl;Myh6MCM/+ 24W
		Age (weeks)	BW (g)	HR (bpm)	LVIDd (mm)	LVIDs (mm)	IVSd (mm)	IVSs (mm)	LVPWd (mm)	LVPWs (mm)	FS (%)	EF (%)	RWT
		30.4	33	555	3.53	2.09	0.9	1.29	0.86	1.27	40.8	72.6	0.498584
		30.4	35	549	3.68	2.35	0.9	1.33	0.85	1.24	36.2	66.8	0.475543
		30.4	40	555	3.55	2.09	0.83	1.3	0.84	1.26	41.1	73	0.470423
		30.4	36	569	3.79	2.45	0.86	1.26	0.85	1.24	35.3	65.5	0.451187
	Total	30.4	36	557	3.6375	2.245	0.8725	1.295	0.85	1.2525	38.35	69.475	0.473934
	SEM	0	1.47196	4.24264	0.0607419	0.0917878	0.0170171	0.0144338	0.00408248	0.0075	1.51355	1.93966	0.00974651
	Palldfl/fl;Myh6MCM/+ TAM 24W
		Age (weeks)	BW (g)	HR (bpm)	LVIDd (mm)	LVIDs (mm)	IVSd (mm)	IVSs (mm)	LVPWd (mm)	LVPWs (mm)	FS (%)	EF (%)	RWT
		32.3	40	595	4.05	3	0.96	1.23	0.88	1.29	26	51.6	0.454321
		31.9	29	397	4.1	2.91	0.93	1.25	0.79	0.95	29.1	56.4	0.419512
		32.1	39	606	3.77	2.75	0.87	1.14	0.72	1.21	26.9	53.3	0.421751
		32	26	534	4.12	3.07	0.87	1.12	0.78	1.06	25.4	50.6	0.400485
		31.3	37	631	3.96	3.17	1.01	1.24	0.92	1.21	20.1	41.7	0.487374
		32	32	558	4.32	3.26	0.86	1.21	0.84	1.17	24.6	49	0.393519
		31.4	31	605	3.82	2.64	0.94	1.19	0.79	1.19	30.9	59.3	0.45288
		31.9	30	630	3.88	2.71	0.92	1.25	0.73	1.15	30.1	58	0.425258
	Total	31.8625	33	569.5	4.0025	2.93875	0.92	1.20375	0.80625	1.15375	26.6375	52.4875	0.431887
	SEM	0.120915	1.79284	27.332	0.0641636	0.0796967	0.0183225	0.0177218	0.0246357	0.0370298	1.23287	2.00735	0.0110039
