# Supplementary material for: Ablation of palladin in adult heart causes dilated cardiomyopathy associated with intercalated disc abnormalities
Source: eLife. 2023 Mar 16;12:e78629. doi: 10.7554/eLife.78629 (PMC10069870; doi:10.7554/eLife.78629)
Supplement: Figure 3—source data 5. [file elife-78629-fig3-data5.xlsx]

## Sheet: Figure 3D
Figure 3–Source data 5. Heart weight to body weight ratio (HW/BW) measurements on inducible cardiomyocyte-specific palladin (cPKOi) and control male mice 8 and 24 weeks after tamoxifen (TAM) induction.
D	Palldfl/fl TAM 8W				Myh6MCM/+ TAM 8W				Palldfl/fl;Myh6MCM/+ TAM 8W
	BW (g)	HW (mg)	HW/BW (mg/g)		BW (g)	HW (mg)	HW/BW (mg/g)		BW (g)	HW (mg)	HW/BW (mg/g)
	34	151	4.44118		30	158	5.26667		33	150	4.54545
	27.7	147.4	5.3213		30.2	133.6	4.42384		24.2	125.7	5.19421
	27.7	147	5.30686		36.7	147.5	4.01907		32.8	185.8	5.66463
	30	141.7	4.72333		29	151	5.2069		32	150	4.6875
	30	144	4.8		25.6	131.5	5.13672		29	153	5.27586
	32	151.7	4.74062		27.9	149	5.3405		29	138	4.75862
	31.8	186.2	5.85535		27.2	148.6	5.46324		32	143	4.46875
	31.5	149.3	4.73968		28.8	155	5.38194		34	170.4	5.01176
	24	123	5.125		28.2	149	5.28369		30.5	198.9	6.52131
	26.8	124	4.62687		28	133	4.75		33.5	178.4	5.32537
	23.2	112	4.82759		28.5	155	5.4386		32	205	6.40625
	27.2	139.2	5.11765		25.9	149	5.7529		27.3	129	4.72527
	29.7	157	5.2862		24.9	129	5.18072		26.2	130	4.96183
	26.4	125	4.73485		25.8	135	5.23256		22.8	121	5.30702
	28.5	138	4.84211		28	151	5.39286		28	141.1	5.03929
	21.7	120	5.52995		28.3133	145.013	5.15135		29.6	156	5.27027
	23.5	100	4.25532		0.724593	2.50753	0.11345		30.4	117	3.84868
	25.5	114	4.47059						24	139	5.79167
	27	124	4.59259						26.8	126	4.70149
	27.8	136.553	4.91247						26.7	147	5.50562
	0.764948	4.57405	0.0937296						23.1	123	5.32468
									27.6	139	5.03623
									26.4	142	5.37879
									28	118	4.21429
									28.8	144	5
									25.7	115	4.47471
									24.2	114	4.71074
									28.4296	144.419	5.07964
									0.637521	4.768	0.11446
	Palldfl/fl TAM 24W				Myh6MCM/+ TAM 24W				Palldfl/fl;Myh6MCM/+ TAM 24W
	BW (g)	HW (mg)	HW/BW (mg/g)		BW (g)	HW (mg)	HW/BW (mg/g)		BW (g)	HW (mg)	HW/BW (mg/g)
	26.2	123	4.69466		32.58	158.3	4.85881		37.6	188	5
	37.7	164.6	4.36605		29.8	142	4.7651		29.7	139	4.68013
	34.9	144	4.12607		29.7	159	5.35354		38.2	158	4.13613
	34.3	188	5.48105		29.2	167	5.71918		31.8	162	5.09434
	27.7	155	5.59567		30.3	170.4	5.62376		28.1	148.2	5.27402
	35.2	175	4.97159		31	163.5	5.27419		35.6	178	5
	31.3	151.1	4.82748		30.2	151.1	5.00331		30.6	141.3	4.61765
	31	162.8	5.25161		30.3971	158.757	5.22827		44.2	185.5	4.19683
	35.1	153	4.35897		0.421232	3.67001	0.139458		45.4	178.1	3.92291
	45.3	178.7	3.94481						36.7	181.7	4.95095
	42.6	166.3	3.90376						33.6	193.6	5.7619
	34.6636	160.136	4.68379						26.5	154	5.81132
	1.73432	5.39814	0.180031						34	176	5.17647
									34.7692	167.954	4.89405
									1.58694	5.12236	0.160335
