# Supplementary material for: Ablation of palladin in adult heart causes dilated cardiomyopathy associated with intercalated disc abnormalities
Source: eLife. 2023 Mar 16;12:e78629. doi: 10.7554/eLife.78629 (PMC10069870; doi:10.7554/eLife.78629)
Supplement: Figure 3—source data 6. [file elife-78629-fig3-data6.xlsx]

## Sheet: Figure 3F
Figure 3–source data 6. Analysis of sarcomere shortening and Ca2+ transients in cardiomyocytes from inducible cardiomyocyte-specific palladin (cPKOi) and control male mice 12 weeks after tamoxifen (TAM) induction.
F	Parameter		0.5 Hz			1 Hz			2 Hz
			Palldfl/fl TAM	Myh6MCM/+ TAM	Palldfl/fl;Myh6MCM/+ TAM	Palldfl/fl TAM	Myh6MCM/+ TAM	Palldfl/fl;Myh6MCM/+ TAM	Palldfl/fl TAM	Myh6MCM/+ TAM	Palldfl/fl;Myh6MCM/+ TAM
	Sarcomere shortening (%)	Average	5.2205	5.4339	3.9055	4.7584	5.7044	3.6245	4.9107	7.0711	3.7091
		SEM	0.4362	0.3655	0.3287	0.4523	0.4264	0.327	0.6382	0.5938	0.4776
	Time to 90% peak (ms)	Average	86.3	98.1	85.7	81.2	90.4	82.1	72.5	88.2	77.6
		SEM	4.2	3.8	4.5	4	4	3.9	4.8	4.7	4.4
	Time to 50% relaxation (ms)	Average	196	248.6	213.6	184.2	223.8	204.5	166.5	199.7	185.5
		SEM	11.7	9.8	11.5	10.3	9.7	10.8	9.7	8.9	9.3
	Ca2+ transient amplitude (Fura 2 ratio)	Average	16.6614	15.8915	11.3059	15.7213	13.9216	10.4886	16.6846	13.1557	10.6556
		SEM	1.6605	2.3961	0.833	1.9828	2.8855	0.9409	2.5106	3.634	1.2061
	Time to 90% peak of Ca2+ transient (ms)	Average	32.31	30.11	32.31	31.03	33.91	31.91	32.04	33.93	34.13
		SEM	0.91	1.34	0.79	1.19	1.76	1.01	1.61	2.35	1.4
	Time to 50% relaxation of Ca2+ transient (ms)	Average	223.03	213.28	250.94	193.95	187.65	205.87	153.88	163.4	171.22
		SEM	8.4	12.38	10.85	6.71	10.17	8.45	3.58	5.32	4.77
