# Supplementary material for: Ablation of palladin in adult heart causes dilated cardiomyopathy associated with intercalated disc abnormalities
Source: eLife. 2023 Mar 16;12:e78629. doi: 10.7554/eLife.78629 (PMC10069870; doi:10.7554/eLife.78629)
Supplement: Figure 4—source data 1. [file elife-78629-fig4-data1.xlsx]

## Sheet: Figure 4C-E
Figure 4–source data 1. Cardiomyocyte (CMC) size, length, and width measurements in inducible cardiomyocyte-specific palladin (cPKOi) and control male mice 12 weeks after tamoxifen (TAM) induction.
C	CMC size (μm2)		D	CMC length (μm)		E	CMC width (μm)
	Palldfl/f TAM	Palldfl/fl;Myh6MCM/+ TAM		Palldfl/f TAM	Palldfl/fl;Myh6MCM/+ TAM		Palldfl/f TAM	Palldfl/fl;Myh6MCM/+ TAM
	2930.9	2769		129	132.307		17.199	20.666
	2170.4	2556.8		141.4	80.54		25.688	34.5
	2156	4304.5		146.3	110.318		27.814	49.218
	3612.2	2475.4		111.3	104.039		33.154	33.181
	3599.6	6218		111.3	103.177		21.374	28.034
	2825	2964.2		185.8	101.974		14.249	29.583
	5055.8	2343.3		87.4	135.709		25.137	25.172
	3203.1	5201.1		90.8	113.516		18.942	38.526
	1636.6	2343.7		142.9	130.2		34.928	34.727
	2579.1	4475.6		88.8	161.525		19.263	24.323
	898.8	2703.8		154.9	138.125		13.03	28.313
	5749	4521.5		161	142.03		31.862	27.814
	2821.1	2693.3		111.2	188.057		15.085	28.56
	1908.3	2800.5		157.7	121.723		32.676	34.626
	4359.6	5508.3		87.1	107.106		15.876	17.995
	2163	2172.6		81	145.752		19.081	31.862
	4955.6	4836.6		122.2	122.24		24.609	18.522
	2482.4	4180.2		106.1	141.487		24.857	26.46
	2077.2	8091.8		129.4	169.808		20.195	32.434
	3324.7	6382.6		107.5	100.557		29.046	59.003
	3021.1	4398.1		85.5	110.769		32.026	18.71
	1876.8	4114.6		142.9	127.996		34.727	23.555
	2580.4	1710.1		115.7	84.713		17.25	31.558
	2007.6	4335.1		100.1	101.733		17.995	35.153
	2394.9	4261.6		142	134.952		21.699	41.543
	2775.1	2031.7		83	104.617		35.941	39.336
	3000.9	4811.7		101.1	127.036		19.534	33.154
	2818.5	2243		132.3	96.651		22.019	27.53
	2728.3	4168.4		105.7	147.898		18.569	44.943
	1766.1	4263.8		150.1	87.328		39.712	27.814
	5244.9	3151		121.3	88.651		25.688	39.068
	3808.7	3104.2		88.7	96.361		23.851	24.287
	2852.2	1858.4		105.2	88.126		29.046	31.972
	2318.7	6337.5		149.3	166.135		23.105	41.774
	2037.8	3148		156	154.429		33.808	42.931
	4317.6	2671.9		125.6	149.241		19.668	37.607
	2263.6	2390.9		145.7	113.037		32.541	18.71
	2527.9	3157.6		122.7	145.048		29.106	34.953
	3133.5	4283.5		149.1	196.678		26.46	32.026
	3655.1	3269.6		123	118.014		13.23	26.194
	3388.2	6209.7		97.9	101.19		14.064	26.493
	2756.3	2863.5		152.5	174.566		29.016	14.249
	3433.7	3562.8		85	115.291		22.53	20.918
	2618.9	4250.7		120.2	75.179		25.551	22.762
	1632.6	2165.2		142.9	117.501		27.274	17.651
	2278.9	3384.7		128.1	133.649		31.558	27.783
	3026.8	4711.9		126.3	129.715		16.735	33.808
	2973.4	2131		161.2	147.145		23.851	28.034
	3454.7	7151.8		152.1	119.876		16.577	32.19
	3692.8	2742.3		119.9	97.669		30.687	38.458
	4422.2	3268.3		136.5	134.309		25.688	22.607
	4479.1	2736.6		184.2	121.464		35.745	19.081
	3190.4	2305.2		123.2	138.909		28.313	23.406
	4301.9	1002.1		113.2	123.692		20.151	37.467
	3652.5	3886.2		114.3	73.388		26.625	29.046
	1995.4	3440.3		167.3	107.879		24.323	48.969
	2837.3	2837.7		93.4	93.41		34.5	21.374
	2369.1	4276.5		120.5	147.382		17.799	34.398
	2692.9	2359		104.7	141.419		36.497	19.668
	2682.4	5432.6		150.7	128.174		25.276	31.364
	4430.5	3602.2		128.8	92.657		22.178	45.925
	1852.7	3120		156.4	131.909		23.667	25.993
	1915.7	2290.3		109.9	150.688		26.06	27.274
	2259.7	3317.7		91.8	136.429		16.577	43.819
	1512.7	2401.5		141.3	84.102		33.075	35.721
	3007.9	4073.5		123.1	135.179		19.845	49.537
	3060	2345		90	81.136		20.666	14.792
	2777.8	2003.7		168.5	137.286		24.395	33.154
	3953.1	5447.5		89.2	174.094		24.395	44.473
	1549.5	4356.6		140.6	92.44		26.592	38.161
	1888.6	3613.6		119.1	115.002		18.803	41.332
	3116.5	3851.6		90.9	87.638		18.942	26.46
	3237.7	2706.4		103.2	102.905		42.665	52.472
	2036.9	2385.7		104.9	116.454		22.53	33.154
	1511.4	4129.9		141.3	139.976		34.398	39.09
	2814.1	3236.4		136.9	155.068		23.667	16.149
	1762.6	5156.9		111.9	105.923		11.381	19.845
	1280.8	6604.9		83.5	84.765		24.323	33.391
	2607.6	3567.2		163.4	101.259		39.068	36.759
	2419.8	4102.3		150.5	128.167		22.53	30.971
	2056.6	2731.8		94.5	100.974		31.862	14.064
	2539.3	6757.6		103.9	130.763		18.71	28.065
	5795.3	1609.9		118.8	95.815		23.105	26.094
	2617.2	4620		105.3	134.152		24.395	46.606
	1637	3310.3		157.5	174.766		30.857	16.577
	3137.9	3364.1		117.2	124.847		44.473	19.668
	3480.5	2640.4		113.6	107.448		20.708	23.851
	2447.8	3182.1		80.5	127.757		23.105	16.149
	1120.6	5840		84	140.226		14.792	37.256
	4401.2	5861		117.8	149.54		41.034	20.238
	2383.1	2043.5		144.8	116.971		22.491	18.71
	1618.2	4864.6		159.1	75.816		44.038	31.752
	2117.5	2678.9		91.7	113.624		41.205	44.473
	2559	3251.7		146.5	97.616		15.429	25.137
	3091.5	3456		145.6	149.458		34.727	31.558
	3247.7	5147.7		125.9	98.951		23.851	33.075
	2496.4	1945.1		129.1	113.037		29.731	61.771
	3003.6	3463.5		168.8	91.44		16.943	33.154
	2909.5	4371.4		137.6	99.225		37.28	32.756
	3910.7	3396.5		81.7	111.901		22.762	20.538
	1883.8	2278.1		122.3	145.229		32.541	31.999
	4402.5	3549.2		105.5	97.481		22.762	44.058
	1276	5376.1		103.7	108.752		17.25	25.551
	3946.6	3178.2		129	116.017		26.094	55.408
	2948	4286.1		163.6	153.707		33.885	21.9
	2693.3	3307.2		135.5	119.393		20.708	29.046
	3551.4	1952.1		112.6	100.103		21.537	17.25
	3819.7	4414.8		150.6	127.517		22.491	20.708
	3412.7	4889.1		137.6	169.023		19.534	41.077
	3474.8	4330.8		133.7	102.008		35.228	24.395
	4636.2	2962		121.1	137.522		31.447	16.365
	2450.9	4445.8		91.1	134.152		35.941	43.195
	2988.3	3912.4		117.8	154.932		35.623	33.73
	4739.9	4942.1		112.9	130.602		39.269	43.518
	4054.2	3252.5		89.4	108.405		14.792	13.621
	2388.3	5144.7		161.4	93.961		20.151	25.276
	2657	2458.3		170.3	97.337		24.323	12.197
	2050.5	4714.5		96	130.119		43.659	36.688
	2309.1	2578.2		117.5	104.55		22.839	42.357
	3633.2	4380.6		136.9	147.495		21.168	27.53
	2608.9	3112.1		114.3	95.265		48.79	29.375
	4722.8	2246.1		77.4	115.972		26.06	23.406
	2422	3018		124.7	160.906		23.814	25.993
	3180.8	1471.6		115.1	120.16		22.491	22.53
	2501.2	4192.5		172.1	151.135		16.943	20.238
	4289.6	4438.8		82.8	121.975		26.361	26.984
	2420.7	3611.8		152.7	178.718		17.995	27.814
	2672.8	3864.3		145.3	157.925		27.53	21.168
	2635.1	1696.5		140.6	121.615		25.688	22.019
	3126.5	2748.9		115.3	120.48		28.313	27.274
	1388	4034.5		87.4	115.526		21.537	29.106
	2531	2009.4		132.7	133.21		17.651	26.261
	1831.3	4518.9		74.5	116.852		27.53	26.094
	1458.9	3652.1		148.9	162.169		20.708	24.962
	1876.4	4795.5		77.8	135.263		33.075	34.423
	1840.5	4780.6		129.1	115.73		24.323	31.999
	3195.2	3515.5		93.2	138.909		18.427	30.999
	2660.1	1552.1		147.9	113.939		22.53	35.598
	2608.9	1389.8		151.3	123.748		22.178	26.789
	2252.7	3228		137.1	169.054		18.803	33.181
	1763.9	5840.4		170.5	120.4		25.276	22.491
	1640.1	3091.5		98.2	132.307		28.895	14.553
	5588.8	2750.2		117.4	135.677		28.895	26.984
	2702.1	2872.3		157.5	111.901		24.857	37.068
	3395.2	3032.4		127.1	110.888		29.286	22.53
	1754.7	4525.5		104.6	142.122		33.075	28.065
	3149.3	3754.5		154.1	106.836		21.333	18.942
	2506.5	3039		160	137.293		19.668	23.406
	2400.1	2309.6		165.1	139.544		24.962	35.745
	3108.1	3461.7		123.1	114.376		29.731	39.69
	2369.1	3184.3		102.3	107.497		30.458	41.098
	3473.5	2227.3		144.7	131.144		16.149	19.668
	4201.7	3524.3		130	115.002		15.085	14.064
	1977.4	4064.7		156	155.895		21.537	26.361
	4271.7	3018.9		111.3	145.626		28.406	17.995
	3855.1	2636.4		115.5	179.655		22.53	17.25
	3654.3	3401.8		78.2	116.612		21.333	28.406
	3420.1	3643.7		125	129.64		14.792	43.337
	873.4	2690.3		155.7	133.564		14.31	31.862
	2613.7	5213.8		119	121.399		35.819	26.984
	1714.4	3424.5		133.2	130.77		15.085	22.762
	3579	2948		137.4	167.818		15.429	25.137
	2950.6	2083.8		117.8	110.643		18.38	28.034
	2991.8	3656.9		90.3	96.588		24.323	18.38
	1348.6	4156.6		114.2	141.66		27.53	22.178
	2778.6	4931.6		147.5	133.466		17.799	19.889
	2741	3513.3		132.2	168.37		14.792	25.551
	2194	3713.3		112.1	161.845		26.094	24.395
	1912.7	2407.6		153.1	104.324		25.448	24.287
	2744.5	5240.9		138.7	144.443		27.783	35.302
	2360.8	1707.9		105.1	77.922		18.803	35.598
	2416.3	2209.8		125	116.424		26.625	34.953
	1924.1	5032.6		144.1	130.2		16.735	20.238
	3837.6	3454.3		86.2	134.842		32.863	24.857
	3768.5	5164.8		133.6	178.463		25.276	29.731
	3615.7	2338.9		90	109.618		28.313	22.491
	2403.6	2965.5		142.8	129.762		21.333	29.016
	2744.1	5456.7		129.3	164.105		20.195	35.549
	1768.3	2956.7		162.5	118.244		20.021	18.38
	2596.2	3717.3		117.8	117.39		27.53	34.803
	1738.1	2107.8		96.1	119.019		30.544	38.367
	4856.7	4792.4		110.2	84.682		26.625	35.228
	3387.8	4967		125.4	125.935		33.312	56.332
	3121.7	5430.4		94.3	137.878		18.942	44.767
	2559.4	2517.8		169.9	106.047		30.687	40.324
	5237.9	1868.5		130.3	76.345		21.168	26.592
	4763.5	2827.2		192.9	145.68		24.323	25.688
	4588.1	3487.1		144.8	140.935		27.909	35.623
	2252.2	2098.6		116.6	137.344		30.886	18.569
	2740.6	3107.7		124.1	145.53		19.668	28.065
	4185.9	4286.6		115.1	118.17		35.819	29.136
	3042.1	3158.9		120.1	115.473		22.53	27.146
	2983	4270.8		134.3	132.545		19.081	26.261
	3544	3315.6		130.5	152.024		19.263	24.323
	4107.1	4897.4		161.4	131.517		15.085	17.799
	3595.6	2159.9		144.2	130.984		30.169	27.783
	3588.6	2539.7		151.6	162.061		34.727	26.984
	3265.7	2813.7		118	177.991		20.151	37.256
	3912.9	2730.1		126.7	164.249		37.42	30.544
	3356.7	2157.3		134.4	135.728		13.621	26.984
	2446.1	2696.8		77.8	86.603		21.333	25.551
	2864.4	3896.7		143.2	144.643		22.762	35.989
	3667.4	3958.8		125.8	99.234		17.401	26.46
	3319.9	3575.5		144.1	121.615		22.53	21.333
	2898.1	4056.8		96.7	109.817		42.85	23.143
	2353.3	1757.8		140.9	142.596		20.918	21.537
	4335.6	3683.6		132.3	109.458		21.537	21.537
	2625.5	4974		112.7	137.35		8.875	28.065
	2872.3	3774.1		119.5	113.516		17.995	39.09
	5012.9	2589.6		137.6	159.491		23.814	30.544
	4575.4	3412.7		144.7	148.229		29.136	42.747
	2857.4	2453.1		116.3	118.348		47.111	22.491
	1636.6	2180.5		106.1	151.476		16.943	23.555
	3703.3	2147.7		92.9	117.442		14.792	14.792
	3818.3	3419.3		112.6	118.125		14.792	13.296
	5374.8	3082.3		77.1	149.797		20.708	35.5
	3278.8	1919.7		140.3	137.312		22.019	32.729
	2359.9	2562		156.3	125.685		41.098	32.756
	2156.8	4602.9		134.4	150.363		17.995	35.623
	2083.3	4525.9		122.8	111.36		13.621	18.427
	3711.6	5391		164	123.578		14.613	22.53
	5761.6	3144.5		134.7	97.669		16.577	17.799
	1490	2830.3		83.4	149.68		18.522	29.583
	2607.6	4200.8		148	126.026		19.081	18.803
	4023.6	2913.4		145.4	128.794		21.209	13.03
	3834.5	2862.7		92.9	143.379		14.792	22.491
	2524.4	2275		95.3	121.176		27.242	16.577
	3704.6	2528.8		103.8	125.685		24.962	20.195
	3656.9	2266.7		146.9	118.222		18.522	26.361
	5513.1	1524.5		118	169.427		23.143	29.136
	2997	2438.2		111.2	86.492		24.962	23.406
	4959.1	2632.9		143.6	151.471		19.845	25.276
	2409.8	4246.7		196.5	133.098		21.209	10.333
	3869.1	3203.1		139.7	126.704		27.53	20.195
	3183.4	5684.6		133.9	144.231		31.447	24.962
	1933.7	5132.8		117	200.053		15.931	18.942
	2567.7	2897.2		94.9	105.815		29.583	50.897
	3670	3059.6		100.6	78.37		13.492	29.583
	3170.7	3350.1		147.1	144.988		33.101	25.551
	2304.7	4916.7		143.9	140.637		26.756	21.168
	3102.9	3418.4		96.5	110.405		45.849	24.287
	3677.4	4967		118.2	144.262		30.886	36.111
	3515.5	8286.5		138.7	116.544		35.989	22.607
	2913.9	3240.3		104.7	141.289		26.625	36.497
	3988.1	2403.2		158	145.554		38.911	18.71
	2729.2	6442.5		115.7	167.442		13.03	34.626
	3590.4	3724.3		160.2	145.151		18.427	47.793
	3157.2	5401.1		111	106.664		18.803	15.931
	3890.5	5290.4		100.2	103.058		23.555	19.668
	2404.5	3631.5		145.4	152.473		29.375	22.762
	4816.5	2761.6		156.6	146.859		15.931	20.918
	3505.5	4778.8		110.6	163.817		30.687	19.668
	2826.3	6316.9		133.1	128.576		14.792	34.143
	3994.3	6507.7		137.9	161.904		22.646	14.553
	4296.6	2345.9		142.2	109.649		38.39	23.555
	2925.2	4149.2		118.7	152.237		19.668	22.019
	3543.1	3097.6		148.7	159.651		12.197	22.019
	2760.3	1844		101.9	160.868		29.136	34.347
	2449.6	3758		116.7	169.473		29.046	31.999
	3461.3	2351.6		130.2	145.53		16.365	39.336
	2012.9	7996.8		134.9	158.898		15.085	41.332
	3676.1	4043.3		111.2	164.818		27.909	20.195
	1799.8	3965.4		80.1	113.022		17.25	32.19
	3403.1	4606.4		115.9	93.961		20.238	58.482
	2431.2	2843		105.1	118.103		27.783	24.287
	3906.7	3239.9		94.6	194.845		39.469	42.604
	2947.6	2977.7		157.5	138.505		13.23	29.136
	1819.5	4272.1		126.4	177.721		24.323	30.544
	2926.6	2842.5		127.2	103.406		16.095	33.496
	1872.9	6105.6		119.6	123.181		20.538	26.261
	3269.2	2815.8		101.3	110.199		20.021	49.236
	2235.6	3872.6		121.5	108.776		22.178	33.075
	1386.7	2632.9		83.3	140.519		31.14	44.375
	1856.7	2889.4		85.2	119.657		38.64	37.138
	3298.9	6049.1		124.5	143.55		17.199	30.544
	3784.6	2699.9		114.2	113.416		33.911	32.676
	2818.9	2175.7		104.1	151.563		35.623	13.097
	2253.5	1957.7		108.3	135.986		17.651	20.666
	2175.2	3792.1		79.3	144.504		22.762	36.688
	2280.7	2686.8		118.5	111.289		29.226	47.958
	3748.3	5911.3		132.1	117.218		26.789	33.73
	3884.9	2444.8		130	103.33		33.47	29.375
	4012.6	4594.2		162.1	126.622		9.355	28.621
	2075.9	5705.6		95.8	130.95		38.458	13.23
	1449.7	3065.7		107.8	187.18		30.198	21.333
	3601.3	3887		141.5	172.544		42.108	27.274
	3138.8	4140.4		173.4	86.492		29.016	25.276
	2036.1	1831.3		97.2	170.092		22.491	33.312
	4978.4	2910.4		145.7	99.797		14.613	27.625
	2225.1	2304.7		117.688	188.094		31.78	30.458
	1516.2	3921.2		97.875	116.379		21.537	27.274
	1902.6	3377.7		122.897	120.98		23.143	20.708
	3201.4	3680.1		64.053	119.868		26.625	54.549
	2770.8	4220.5		126.822	104.751		31.558	20.666
	4315	4144.8		135.806	146.614		22.53	29.375
	3075.8	3204.9		174.365	91.133		17.25	18.71
	3900.6	2140.7		86.401	84.858		26.756	46.475
	2787	2819.8		102.931	113.084		41.438	25.551
	3579.9	3905		59.299	135.761		9.632	15.085
	4739.5	3082.3		117.173	150.357		29.848	40.498
	3302	2622.9		106.795	151.06		24.857	27.274
	1564.8	3213.2		81.06	128.44		21.374	32.19
	4286.1	3123		118.488	95.256		19.534	48.158
	2935.7	4007.8		159.035	107.448		32.676	26.261
	1595.4	4067.3		94.342	146.04		35.745	35.941
	2058.4	2206.7		110.453	168.208		16.365	27.909
	2493.3	2123.1		115.889	123.833		27.783	34.5
	2699	4920.2		119.4	78.96		28.895	13.23
	2940.1	2664.9		120.4	138.587		16.149	21.168
	3106	4454.6		101.181	126.13		14.792	25.102
	3555.4	2730.5		104.651	127.063		9.54	29.583
	1940.7	4529.4		125.483	116.964		32.19	51.665
	4511.5	3279.7		134.094	163.673		41.543	22.762
	2663.6	3557.5		117.24	107.879		26.361	19.668
	4946	2334.1		105.873	147.685		24.142	42.357
	1842.2	2862.7		122.068	117.873		31.862	23.851
	4619.1	2014.2		110.151	161.828		18.38	32.541
	2617.2	2361.2		78.326	111.337		23.851	16.943
	4613.9	2569.9		109.817	142.276		18.71	29.046
	2566.9	1665.9		107.236	112.96		22.646	18.803
	5018.6	1900		166.267	144.571		14.249	29.136
	2335.4	5007.7		146.877	96.57		23.667	44.767
	3011.4	2378.3		108.494	88.651		15.429	29.286
	4686.5	4975.3		72.524	152.49		39.09	19.263
	3120.8	4557.4		167.792	117.173		22.762	16.149
	4508.8	1961.7		99.586	91.133		34.423	14.064
	2346.8	2189.2		105.376	111.258		34.014	22.607
	3962.7	4980.6		99.26	114.88		30.772	30.999
	2759	3503.7		196.291	98.792		30.772	31.447
	2481.5	3124.3		107.228	94.675		46.756	35.028
	2457.5	1978.3		130.77	87.608		20.581	23.406
	2284.6	2891.5		81.092	99.163		22.53	22.646
	2861.8	1857.5		132.525	95.403		17.25	40.172
	2713.9	5113.6		204.77	150.112		15.429	12.481
	3159.8	3537.9		108.147	101.974		24.395	49.094
	2790.5	3966.7		100.583	120.306		20.538	37.467
	4543	3548.8		115.587	142.153		34.626	16.735
	3411	3399.1		142.418	156.902		40.237	31.862
	1956.9	4780.1		156.114	116.852		23.105	21.333
	2483.3	1539.9		97.902	155.305		40.498	16.365
	2847.8	3248.2		105.716	179.114		22.491	19.263
	1570.9	2633.8		101.354	119.099		22.839	35.598
	3011.4	2800.1		176.911	141.567		14.613	21.168
	4922.4	4321.6		183.368	126.96		22.491	21.168
	4509.3	7200.9		105.318	106.508		27.274	19.845
	3871.3	2830.7		115.223	137.35		24.857	17.995
	2680.2	4688.3		131.803	165.375		16.577	26.756
	2927	5029.1		143.495	117.121		31.862	34.322
	3565.4	3597.8		113.97	139.393		24.142	23.406
	2552.4	3336.6		107.562	132.881		33.911	20.666
	1940.2	4223.5		109.936	112.649		52.422	17.995
	3910.2	4231		124.762	119.759		14.792	44.375
	3267	3127.4		113.601	113.037		31.14	21.9
	6099	5041.8		96.588	159.206		15.429	34.626
	1802.8	2056.2		150.2	136.884		34.928	16.149
	2377.8	2686.8		69.063	151.598		25.448	37.653
	2788.3	4537.3		81.823	94.156		18.942	55.139
	3614.4	2988.7		143.763	162.734		20.666	25.102
	2746.3	2314.4		136.211	103.583		18.803	39.8
	1521.5	3312.5		167.023	176.297		26.06	21.333
	2909	2775.1		94.221	101.794		24.395	34.322
	1703.1	4748.6		88.562	149.692		24.857	31.999
	1948.6	5861.9		131.217	141.264		35.941	37.068
	1471.2	4508.4		139.468	113.107		23.105	33.73
	3768.9	5926.6		188.559	166.598		31.78	27.242
	2325.8	1984		109.097	107.163		33.312	22.646
	3042.9	2524.4		118.989	93.961		24.142	22.491
	2865.3	3597.8		76.973	144.262		28.127	20.708
	3413.1	4952.1		136.372	156.674		23.105	21.209
	4154.8	3951.4		97.589	124.931		34.398	18.522
	2061	5819		117.121	154.921		19.081	14.968
	2357.7	4549.1		124.475	119.868		24.287	24.142
	3031.6	3488.4		107.814	143.501		22.53	20.195
	2503.4	3850.7		158.191	91.526		24.287	34.143
	3429.8	5390.1		155.845	71.613		36.328	19.081
	3536.1	2790.9		119.868	143.818		17.25	29.016
	4919.7	2836.8		137.044	111.423		26.194	24.323
	3025.9	6833.7		127.063	66.48		32.863	14.064
	2097.3	4720.2		152.122	106.541		25.448	55.25
	2682.8	2116.1		103.202	82.25		23.851	19.534
	2394	3008.8		118.222	117.992		27.53	24.323
	2912.1	4748.2		111.399	170.426		27.814	16.839
	2326.2	4406		90.758	108.881		25.102	25.688
	2624.6	6138.8		92.127	187.982		26.361	30.169
	2263.2	5713.1		114.743	89.192		36.328	14.31
	3794.7	4203		142.375	170.764		20.538	27.909
	3350.6	2266.7		117.814	253.868		30.886	15.485
	2640.4	4381.5		139.644	105.914		14.792	18.71
	3091.1	3633.2		155.423	143.775		22.452	31.807
	3077.1	3108.6		139.819	103.033		29.286	19.534
	2794.8	2815.4		95.054	222.52		16.943	18.803
	3386.5	3421.9		121.176	88.75		25.688	33.885
	3483.2	3755.8		160.585	136.596		40.237	42.191
	3209.7	4185.9		150.363	116.334		22.646	29.106
	3875.7	4850.2		136.038	143.495		21.168	40.172
	6375.1	4600.3		148.989	154.994		23.105	19.081
	3181.2	5278.6		71.123	157.437		21.537	12.197
	2362.5	4514.1		131.803	145.998		18.38	20.918
	2992.2	4188.1		132.894	127.996		29.046	30.169
	3488.4	2742.8		135.677	155.744		26.592	30.169
	3684.9	2320.9		99.604	90.168		17.25	22.607
	6108.6	4635.3		144.013	147.945		43.639	47.646
	4120.3	3804.3		100.287	101.251		36.592	31.364
	2826.3	1940.7		96.796	110.508		26.46	10.333
	4173.2	3468.3		136.429	149.358		32.434	13.23
	4485.7	4271.7		130.95	185.338		62.195	33.808
	3869.5	3512.9		168.769	133.623		23.814	20.918
	2871	3199.6		112.33	177.287		31.224	29.936
	3509.4	3827.5		119.254	111.423		14.064	32.434
	3570.7	3269.6		115.972	138.77		28.127	22.53
	3565	4065.1		101.466	87.047		32.676	24.323
	3044.7	1460.2		125.546	125.935		14.792	14.553
	4293.6	3018		91.679	124.51		29.994	58.227
	3125.2	2414.6		102.692	166.561		30.772	37.068
	1568.7	1580.1		141.419	168.146		23.406	26.789
	3085	3965.4		99.744	146.948		23.143	28.498
	2222.5	1585.8		108.687	167.452		19.845	30.169
	2694.6	3501.1		91.373	146.877		22.762	22.53
	1970.4	3446.4		174.641	140.113		14.553	41.205
	2594.9	2556.8		133.361	60.251		24.323	16.735
	2567.7	2460.1		157.209	113.97		21.819	42.274
	5342.9	2478.9		91.297	140.91		31.224	31.447
	2758.1	2969		141.332	146.829		23.105	10.666
	4101.9	4157		203.948	135.212		26.789	26.46
	2766	3500.2		141.264	75.423		27.814	30.169
	3096.3	2872.7		119.657	194.602		44.375	36.855
	3482.7	2165.2		102.752	109.546		20.538	34.398
	2045.3	3700.6		178.61	157.042		14.31	25.137
	3067.9	3724.3		73.958	128.195		31.862	42.706
	3080.6	3560.6		150.81	119.077		30.544	25.448
	3833.7	1406.8		82.26	85.382		59.166	29.016
	3684.4	3670		119.803	100.138		22.607	41.205
	2905.5	1674.2		123.039	161.828		19.081	25.551
	3591.7	3113		149.241	110.318		22.53	30.458
	2721.8	3347.9		95.256	113.724		25.448	19.534
	3923.8	3167.2		171.735	197.344		34.014	35.721
	4648.4	2261.9		93.625	98.232		30.886	31.807
	2529.7	4978.8		115.836	114.216		23.105	34.953
	2450	3028.1		113.022	102.008		36.688	22.53
	3195.2	2944.5		158.191	88.878		24.395	35.989
	3706.8	3615.7		153.314	155.152		22.762	40.498
	2340.6	2028.6		90.372	110.151		32.19	25.993
	3687.1	2644.3		147.02	150.903		29.046	38.572
	2768.1	3533.9		163.464	128.556		23.444	25.688
	3474.4	2172.6		126.462	111.768		28.034	39.8
	3579.4	4495.7		123.117	112.323		29.375	30.198
	2985.2	4468.6		78.582	130.287		18.38	30.857
	3400.5	3396.1		119.077	90.787		33.075	76.471
	2244.8	3062.2		113.663	128.549		41.543	48.79
	1816.8	3344.4		103.879	131.184		30.429	28.56
	3113	1525.9		125.371	120.575		18.803	33.73
	2496	3631.1		136.14	193.158		19.845	31.752
	2289	2902.9		94.74	171.582		22.762	28.621
	3102.9	3003.1		97.121	189.231		26.361	27.53
	2717.4	5580		140.917	151.869		33.075	32.19
	2595.7	5775.2		89.202	153.929		16.735	37.653
	2974.2	5270.7		117.531	134.328		17.199	25.137
	1991.9	3870		153.61	70.169		24.395	22.019
	2484.6	3644.6		152.736	109.29		16.735	21.168
	3957.1	5359.5		107.782	98.588		20.708	22.178
	2573.9	3837.2		107.457	110.785		26.06	19.845
	2005	3996.9		144.855	131.304		26.261	27.274
	2336.7	3084.1		97.902	120.131		18.38	21.374
	3439.4	3241.6		94.082	169.556		25.414	20.581
	2506.5	3282.7		130.287	230.662		25.448	37.068
	2594.9	4426.1		124.179	159.052		21.537	30.886
	2445.2	2210.7		113.393	105.052		17.799	21.537
	2938.4	3222.8		104.148	99.998		26.194	42.604
	2492.9	2981.7		109.097	109.234		31.807	20.151
	2372.6	2973.4		96.905	167.332		23.851	36.328
	3523.9	5047.1		112.579	138.125		12.197	24.287
	9338.4	3085.4		146.668	88.285		34.347	17.651
	5737.1	3950.9		144.231	106.795		13.813	31.807
	3527.4	4849.7		135.496	106.434		15.085	21.209
	2707.3	2286.8		133.256	112.135		41.332	35.721
	3283.2	4264.7		95.265	140.543		25.137	14.613
	3025.9	2773.4		114.376	99.612		39.712	18.71
	2825	2958.9		201.8	132.854		23.961	19.889
	5292.6	4350.9		93.119	100.452		20.021	50.378
	1422.6	3881.8		134.952	143.379		25.414	28.034
	2764.6	2982.1		120.944	201.396		23.814	13.03
	5370	4145.7		113.045	154.128		35.228	41.522
	2128.8	2943.2		78.96	154.678		34.626	28.498
	5092.1	2701.2		82.122	84.143		29.136	41.205
	2751.5	2655.2		82.833	133.065		22.53	17.401
	3375.5	2445.2		119.539	136.391		13.23	34.727
	3075.8	2790.9		139.324	107.236		24.716	31.558
	2584.8	4948.2		96.316	71.246		19.845	23.961
	2034.3	2952.8		107.098	197.889		26.789	26.592
	4072.1	4195.1		98.339	114.277		16.735	25.276
	2141.1	3875.7		138.631	113.508		51.376	37.839
	3420.6	2434.7		147.655	71.123		13.813	29.226
	2720.9	2551.5		103.921	121.615		21.537	20.666
	2877.1	3684.4		117.33	149.499		25.137	33.911
	1532.4	2481.5		113.901	144.007		40.237	30.687
	1560	4547.4		95.623	115.496		37.044	33.391
	2316.1	1812		139.869	78.135		22.53	37.256
	3058.3	3072.7		162.992	109.498		44.767	41.837
	2481.5	2717.4		134.725	113.014		20.666	15.085
	2220.7	2192.3		96.47	134.667		24.395	16.839
	3288.9	3734.3		153.251	121.982		41.837	28.313
	3772.8	1437.5		159.924	167.52		25.688	39.69
	5187.1	1932.4		110.453	150.083		27.909	33.391
	3548.8	4942.9		153.525	93.718		22.491	18.71
	2365.1	2792.2		91.325	81.609		29.848	24.323
	2444.3	2250		100.138	86.249		29.583	32.729
	1547.3	4323.7		100.757	119.254		37.044	18.427
	2307.8	3371.6		102.931	66.48		21.9	32.541
	2770.8	4596.8		100.626	63.642		25.993	16.943
	1991.4	3978.1		170.918	186.435		14.792	41.837
	2467.5	2806.2		105.052	115.169		21.168	27.146
	2669.3	4354.4		125.881	78.671		27.909	58.347
	3169.4	4069.5		140.338	153.747		15.485	33.075
	4469.5	1963.4		109.554	149.71		18.942	25.551
	3989.4	3182.5		141.66	116.852		25.102	37.885
	2193.6	3659.1		109.137	152.076		24.287	17.75
	2230.8	2762		83.044	119.539		25.993	20.666
	4543.4	4106.7		137.044	129.762		23.814	21.209
	4825.7	2099.5		175.8	139.976		25.137	17.25
	2726.6	3310.3		127.723	145.746		19.889	18.427
	1491.7	4204.3		182.425	184.581		27.53	29.106
	2616.3	2756.3		88.562	100.974		21.374	58.587
	2544.5	1571.4		128.882	120.676		25.448	31.558
	2148.5	4038.9		156.919	101.768		26.194	38.458
	5234.4	5268.9		120.654	120.633		33.73	17.199
	4706.6	3487.5		148.465	100.024		15.429	46.775
	2293.4	1947.7		123.861	150.874		20.708	36.783
	2989.1	2193.6		133.963	194.247		31.752	20.538
	3442	3946.1		163.218	123.578		30.198	16.149
	2659.2	2817.2		79.655	117.501		14.553	20.151
	2257.5	2416.3		121.176	124.453		22.019	25.276
	1892.5	518.5		98.446	128.392		30.198	19.845
	2024.3	2563.8		104.726	122.726		19.845	22.53
	2913	3014.1		157.014	110.959		14.968	23.143
	1691.7	3302.9		141.783	113.724		13.23	47.701
	2571.7	4099.7		106.211	97.31		24.323	23.444
	5928.4	1698.3		110.119	110.951		33.154	39.18
	2800.1	1912.7		148.388	130.287		16.095	26.361
	3802.2	3813.5		73.388	127.015		25.172	36.328
	3828	2564.2		106.137	134.901		17.25	21.374
	5415.1	5973		139.644	122.776		19.668	30.544
	4916.2	3233.7		145.175	130.327		20.666	19.668
	2755	1880.7		135.541	154.429		12.197	28.065
	3279.7	3964.5		94.527	132.597		18.71	13.23
	2671.9	3902.8		80.366	137.388		22.646	34.626
	6038.6	1534.2		105.592	160.743		20.918	39.69
	3516.4	2082.5		115.223	127.812		11.304	34.803
	4262.1	3363.7		105.683	93.942		15.085	13.813
	2543.7	6003.6		90.555	134.901		22.452	68.195
	3983.3	2661.4		113.809	217.701		29.286	38.367
	3521.7	2736.6		76.973	178.384		20.708	34.727
	3831.5	4071.7		135.134	109.097		21.333	24.142
	2514.8	1806.3		106.778	159.689		27.625	22.53
	2170	2630.7		97.982	122.433		24.323	29.136
	1767.8	5430.8		136.699	161.525		16.095	22.53
	5064.6	4470.3		125.789	129.093		22.762	27.242
	4192	11306.7		143.104	145.229		25.688	26.06
	1701.8	4802.9		105.617	132.3		20.151	26.625
	3718.1	4289.2		112.135	134.725		15.085	31.972
	4944.2	6653		139.167	79.875		16.577	27.274
	3741.8	3818.3		139.844	142.712		37.607	15.986
	1992.3	3322.1		129.221	93.41		15.876	19.845
	1393.7	5649.6		144.086	99.181		21.333	14.064
	2257	4453.3		145.95	120.48		26.789	41.416
	2955.4	2293.8		94.268	106.146		11.833	32.676
	3252.5	2917.8		196.464	152.719		20.021	26.789
	3319.9	3493.2		102.419	245.341		33.312	39.69
	2564.2	3527.8		98.739	178.879		39.778	24.323
	3031.1	4374.9		177.598	168.203		23.143	47.499
	2392.7	3334.8		188.094	127.228		26.625	32.541
	2068	3347.1		88.255	155.023		16.735	26.46
	3018.4	3473.1		113.014	112.276		31.224	43.074
	1677.7	4013.5		120.131	113.939		19.845	25.414
	1797.6	3858.2		113.993	128.44		31.972	17.25
	1744.6	2884.5		156.388	120.633		21.9	29.286
	1669.4	3014.5		87.848	115.101		22.839	31.447
	2365.6	1730.6		98.223	163.929		30.886	33.312
	4217.4	5258		139.261	104.592		35.623	39.8
	2549.8	2664		171.735	109.306		35.623	37.28
	4893	1532.4		153.382	98.951		16.149	17.25
	3267.9	3589.9		107.709	124.538		23.444	29.731
	3307.7	4042.8		97.292	119.518		41.332	21.333
	2321.8	5183.2		91.756	99.612		44.63	42.604
	2354.2	3524.3		147.382	133.806		33.47	31.78
	1420	3254.7		80.746	194.62		14.613	25.993
	2552.4	5075.1		125.581	143.55		10.91	25.102
	2653.1	4977.5		117.688	159.2		20.195	31.807
	1970	4015.7		88.799	121.975		24.962	10.666
	4279.1	4708.8		161.974	129.681		39.527	25.551
	3625.8	4785.8		78.593	126.379		27.814	27.909
	2009.4	5552		100.409	151.471		23.143	47.111
	3666.9	5893.4		111.666	112.649		38.572	17.995
	1995.4	2936.2		248.939	150.659		43.256	20.918
	2689.8	3251.2		124.629	120.422		14.31	20.666
	2852.2	1305.3		137.694	113.084		22.452	53.184
	2763.8	3989.9		119.43	112.572		18.942	35.302
	2625.5	3000.9		157.209	92.846		23.667	25.688
	3408.8	4395.1		123.663	161.953		28.034	26.756
	3951.4	3885.7		127.62	110.698		17.25	22.53
	2555	3850.3		108.752	167.369		21.9	31.78
	2932.2	3675.3		159.859	97.624		21.9	22.53
	3163.7	3860.8		135.677	157.276		18.569	40.041
	2129.3	6670.1		88.887	133.17		22.53	43.679
	2138.5	4077.4		141.419	123.578		20.021	22.53
	2109.1	6342.8		155.068	96.661		20.666	36.111
	1808.1	4657.6		107.709	106.705		23.555	17.651
	2291.6	4405.1		147.945	162.686		20.195	36.401
	3588.6	2950.2		114.216	84.091		21.9	35.153
	2541.5	5029.6		181.887	143.495		39.068	36.759
	1886.4	4421.8		141.783	95.961		27.625	49.218
	2161.2	2966.8		86.005	163.137		17.199	14.31
	2205	4224.9		112.735	137.821		27.274	41.522
	3312.9	5387.5		122.19	71.613		26.789	43.979
	2679.8	5482.9		132.525	80.344		19.081	20.581
	2791.3	4426.1		108.518	179.29		41.205	26.46
	2247.9	4370.1		152.024	185.602		24.142	16.577
	3469.2	7095.4		123.046	144.079		29.583	25.688
	2972.1	4051.1		118.643	116.401		27.274	29.375
	3213.2	5597.1		107.709	168.65		21.537	21.537
	2748	3987.2		126.04	118.665		28.895	39.712
	4350.9	3558.9		125.546	93.062		25.993	21.333
	4798.5	3075.8		156.718	160.362		28.065	19.081
	3842	4698.3		172.295	98.81		25.172	15.085
	3326.5	3186.9		140.991	129.154		22.019	29.731
	4612.1	3740		97.337	109.001		25.448	34.014
	4074.8	5560.4		89.964	150.34		36.401	27.274
	4961.7	1934.6		115.972	132.048		37.138	33.885
	2241.3	4783.6		176.396	115.655		17.25	21.168
	3460	2632.9		117.688	110.5		15.085	35.302
	3749.2	4013.5		120.269	92.619		21.537	25.688
	3715.1	4726.8		109.097	140.91		13.097	15.931
	2622.9	4883.9		117.061	139.544		18.942	33.47
	4394.2	2779.5		142.246	137.675		24.323	21.168
	4401.6	1308.4		104.943	99.234		14.613	27.783
	4330.8	1893.4		94.221	82.409		19.845	29.848
	3602.6	2681.5		83.044	114.376		16.365	13.621
	6047	3541.8		204.124	162.465		25.276	30.198
	5148.6	2196.2		133.492	142.448		23.851	23.814
	3348.8	2314.8		186.773	125.211		36.401	13.813
	3347.1	3225.9		102.488	124.425		30.458	19.845
	4237.5	2667.5		181.169	175.964		16.839	50.638
	2108.3	3292.4		127.242	133.21		46.305	17.995
	3271.8	2946.7		112.572	133.21		15.085	39.69
	2139.8	2745.8		143.208	152.61		27.909	27.274
	4723.3	2685.9		214.656	117.218		17.25	27.909
	3788.6	3357.1		97.982	132.894		20.195	24.287
	3581.2	2250		208.837	130.522		29.848	14.31
	2356.8	4247.6		97.875	132.36		22.178	16.577
	6653.4	3178.6		134.667	112.579		39.888	19.668
	2648.7	2777.8		123.84	151.355		23.851	30.971
	2937.9	2008.1		142.945	140.519		16.735	21.333
	4956.5	1615.1		96.724	112.572		39.69	34.423
	3340.1	1839.2		148.654	113.901		25.993	26.361
	3797.8	3044.3		113.014	82.377		22.53	17.995
	2619.8	5321		91.133	78.693		31.78	30.886
	3939.1	2592.7		89.437	91.679		57.44	30.999
	2906.4	1503.1		91.631	92.846		33.154	21.168
	4456.3	1880.7		136.481	81.823		29.016	17.799
	3514.2	1840		123.217	138.125		14.792	55.77
	2496.4	3799.1		111.289	157.036		54.549	12.197
	1855.8	3239.9		124.425	124.812		38.367	33.808
	2204.1	5024.8		109.097	133.963		40.756	19.845
	2474.1	2401.9		85.515	94.017		33.391	57.242
	4160.1	4392.5		93.569	129.735		22.491	45.849
	1840	1978.7		172.802	142.307		18.942	30.227
	2519.6	3787.7		152.645	118.007		18.942	41.077
	3060.9	2448.7		90.207	169.638		27.909	33.885
	2545	3723.4		153.861	147.916		20.581	38.458
	2879.3	2408		160.345	103.338		21.537	27.146
	2025.6	4182.4		151.135	125.371		26.625	36.328
	3022.8	3376.4		178.139	106.91		25.688	31.14
	3715.9	3236.8		102.752	105.043		14.249	35.745
	3138.8	1831.7		127.256	96.796		31.447	22.491
	4741.2	3103.8		186.745	125.483		14.613	29.286
	3823.2	3305.1		137.903	175.141		14.553	33.808
	3141.4	3126.5		125.581	95.302		26.592	23.444
	1640.1	2359.4		141.617	209.16		19.668	33.181
	3534.4	4848.8		128.767	130.3		18.38	26.06
	2809.7	3044.3		171.092	103.879		18.427	18.803
	4539	2715.6		126.573	149.593		23.105	40.237
	2952.8	3404.8		113.847	132.723		14.613	22.646
	1871.5	4353.1		152.145	109.29		16.839	25.102
	2212.9	2586.5		112.291	165.708		22.019	30.544
	2663.1	2553.3		150.99	150.642		15.931	23.851
	2818.9	1876.4		157.075	141.654		35.721	20.918
	1566.1	3537		199.791	148.253		31.558	12.197
	3982.4	3886.2		119.539	142.393		41.416	27.53
	1458.5	1829.1		107.448	120.676		29.583	43.074
	3390.8	6709.9		156.59	128.392		17.799	35.745
	1625.2	3453		120.654	113.045		15.931	43.074
	1921.4	2913.9		135.593	134.92		22.53	67.59
	2188.3	3612.7		99.445	102.137		31.447	31.78
	3072.3	2890.2		143.648	147.335		29.016	38.911
	3298.9	3357.6		133.098	105.085		20.195	21.537
	2210.2	2129.7		116.454	137.656		22.646	29.136
	3106.4	3886.2		139.192	149.1		31.999	34.953
	3913.3	2984.3		167.818	123.557		17.75	36.401
	4303.6	3439.4		129.282	88.887		29.016	37.467
	4623.1	5095.6		134.952	123.437		23.961	32.756
	1972.6	6421.1		120.712	140.543		42.108	18.942
	2818.5	3996		152.289	129.221		25.551	21.537
	2245.2	4439.7		125.294	143.104		30.886	33.885
	1349.1	3306.4		92.61	110.706		21.333	20.708
	1219.1	3407.5		101.423	162.686		33.73	21.333
	4267.7	3553.6		145.626	188.452		43.979	20.918
	2612.4	2419.4		139.393	126.704		26.493	20.238
	4430.1	3524.3		114.269	149.873		30.886	25.551
	2628.6	2853.9		115.374	110.453		30.458	13.23
	4355.3	2102.6		124.847	101.466		28.313	22.53
	2793.1	2694.2		176.911	150.845		27.814	26.756
	3067	2155.5		140.462	145.078		18.522	15.876
	2918.2	2205		141.567	111.148		21.537	25.448
	2582.2	2438.2		165.507	224.805		25.276	18.942
	3357.1	2384.4		139.544	128.882		12.481	27.814
	4229.7	2041.3		145.56	123.43		22.762	39.8
	2977.3	3162.4		110.318	86.966		15.986	21.168
	7676.1	3441.6		107.619	99.472		25.551	38.526
	1153.9	3040.3		140.325	104.592		53.332	42.274
	4050.3	2054.9		139.675	105.592		23.555	22.178
	2096.9	3114.7		99.163	161.828		18.522	25.551
	3032.4	1868		141.338	121.197		14.613	27.146
	3002.3	1890.4		110.127	155.845		17.25	28.313
	2877.1	2070.6		144.522	109.642		31.807	24.962
	2657	2194.5		123.5	107.619		42.357	28.406
	3225.9	3064.4		166.561	115.109		26.194	16.735
	2138.5	1969.1		169.054	118.901		49.925	26.789
	4280.4	3448.1		140.369	131.451		27.783	12.197
	3743.5	1915.7		144.571	96.57		25.172	20.581
	3448.6	6335.8		122.754	133.315		23.143	18.569
	2057.1	1631.3		111.211	103.236		26.46	31.999
	5218.6	1774.4		98.951	110.127		36.497	29.583
	2478.9	3893.6		97.481	94.156		30.886	23.105
	4276.5	2625.1		152.427	142.246		17.199	31.224
	4239.7	3614.9		116.792	80.093		33.47	20.021
	3980.2	3290.6		104.215	104.408		24.609	35.745
	3538.3	3243.8		94.851	58.122		29.936	33.181
	3655.6	2335.8		140.575	108.591		28.313	18.71
	2380	3173.3		112.649	149.774		37.068	23.851
	4191.2	8026.6		140.269	159.079		16.149	21.209
	3898.4	2831.6		127.18	107.684		20.195	22.491
	4717.6	6037.8		77.143	150.967		27.53	15.085
	4831.8	2686.8		125.581	108.687		35.623	22.762
	3627.1	2769.9		167.4	116.432		32.676	20.538
	2688.1	3911.5		95.265	164.137		44.767	30.544
	3653.8	4016.6		167.348	91.756		15.485	17.75
	3378.6	3281.4		146.429	99.225		22.646	18.942
	3050.8	3439.8		97.741	99.234		45.524	20.918
	3319.1	2609.3		93.718	119.254		52.937	33.391
	3060.9	3199.6		94.666	138.233		22.452	21.209
	3956.2	3660.8		176.51	92.997		18.803	25.414
	3100.3	2952.8		136.859	232.615		29.994	34.014
	4000.8	3303.3		119.4	172.463		23.851	21.9
	5125	1413.8		60.584	126.635		22.178	35.228
	3007.5	3080.6		147.466	112.665		19.668	25.551
	4159.2	3432.4		180.457	101.078		24.609	26.493
	2910.8	5100		71.942	128.358		32.19	30.857
	5153.8	6655.6		131.184	176.956		24.323	21.333
	3064	3601.3		89.545	148.182		36.855	29.583
	6746.6	4074.8		96.796	125.581		16.365	21.537
	3245.1	2683.3		124.425	182.871		34.953	16.365
	2729.6	2159		120.676	102.205		25.688	31.807
	3358.4	4395.5		71.979	138.454		21.699	24.716
	2500.8	3551		99.463	160.105		33.075	22.019
	2992.6	3761.5		150.532	120.109		15.986	31.78
	4465.5	5745		157.042	140.244		33.154	13.296
	3996.9	5138.1		151.181	121.896		15.931	16.943
	5247	2437.3		129.802	138.125		26.625	23.851
	3742.2	3961		99.401	115.518		33.181	15.931
	6397.5	4113.3		105.906	111.549		23.851	38.092
	2413.7	5473.3		112.525	93.933		23.851	25.137
	2246.1	4536.4		122.989	158.589		20.238	35.721
	2734	2753.7		143.483	150.903		31.807	21.333
	4737.7	4808.2		125.294	136.884		26.625	35.228
	2824.2	2904.7		142.939	131.584		14.553	37.256
	2529.7	2816.3		120.915	139.116		23.406	19.534
	2696.4	2154.2		120.131	143.623		19.889	36.688
	4132.5	2999.2		133.891	120.749		40.498	10.666
	3615.3	3954.9		132.597	103.177		32.729	15.429
	2859.2	2752.4		111.329	151.546		21.209	20.581
	3527.4	3358.4		120.705	100.452		15.085	22.491
	3300.2	4150.9		134.92	104.926		23.444	17.75
	2199.3	3724.7		174.766	122.583		37.42	32.541
	3773.3	6704.6		120.044	91.756		13.03	24.857
	2857	2213.7		132.247	150.903		31.807	31.558
	4520.7	2854.8		180.093	100.626		17.75	31.14
	1960.4	4270.8		144.231	110.318		19.668	25.993
	4523.3	2056.2		97.238	131.144		22.607	15.429
	2189.2	2211.1		154.287	120.226		45.849	23.406
	4556.1	1833		160.28	109.29		36.592	34.398
	1912.7	3004		111.517	120.915		29.106	45.849
	4529.9	3412.3		138.77	93.569		28.406	20.666
	2687.2	2926.6		183.053	120.4		20.238	28.498
	1848.8	3145.3		113.97	143.818		14.31	24.142
	4520.7	2678		101.423	93.062		31.807	41.837
	4556.1	4245		137.903	83.778		21.699	22.839
	1428.3	3502		179.524	106.836		17.651	24.962
	2766.8	2656.1		143.501	110.064		26.46	47.333
	2792.2	3141.4		187.982	159.99		24.857	18.942
	5620.3	3980.7		195.271	90.314		17.199	15.485
	4335.1	3585.1		126.379	118.996		18.71	24.962
	1467.2	2472.3		180.38	117.539		35.745	18.942
	2166.9	2801.8		120.044	186.838		36.855	36.401
	3631.1	2418.5		116.379	147.898		8.875	31.447
	3417.1	2907.3		140.873	104.324		59.122	35.745
	3193.5	2986.5		131.783	121.197		21.168	25.688
	2770.3	2503.8		137.751	96.316		18.942	23.851
	4088.3	1668.9		88.126	169.054		18.569	22.491
	4947.7	3118.6		99.26	125.078		33.075	17.799
	2130.2	3288.9		103.988	84.775		18.803	27.274
	2286.8	3336.6		129.316	125.246		25.172	24.716
	2602.7	2913		164.009	108.663		24.323	24.142
	3144.5	3418.8		114.682	136.429		24.857	26.592
	2380	3133.5		153.605	103.921		15.085	10.333
	5076	2785.6		110.008	130.119		17.199	20.538
	4416.5	2923		138.467	136.596		30.687	21.168
	2764.2	3759.7		165.608	144.843		28.313	13.492
	5259.7	2257.9		148.512	123.713		26.756	23.143
	2616.7	4323.3		165.634	78.671		22.019	18.803
	5186.7	2963.3		136.635	158.064		24.323	19.534
	2091.6	2757.6		126.137	144.758		13.23	25.688
	3076.6	3432.4		137.267	113.037		16.943	23.143
	2064.5	5026.1		148.388	107.684		13.03	33.73
	5352.9	3245.5		90.555	125.859		14.792	35.028
	3818.3	2002.4		117.173	97.238		30.227	28.406
	2516.5	3044.3		98.339	107.684		41.098	13.621
	1858	3971.1		147.857	112.323		22.53	13.621
	1966.9	3333.5		123.67	124.51		31.364	21.333
	2709.9	3653.4		110.127	144.716		27.909	59.461
	3549.2	8087		141.827	136.596		30.429	35.623
	3607	4398.1		106.211	113.901		33.73	15.876
		2843.4		85.515	84.837		30.886	17.799
		4877.3		136.211	120.749		29.226	23.406
		4848		105.749	123.344		28.065	20.918
		3364.1		112.276	112.649		13.296	27.242
		3426.3		114.216	113.663		26.46	29.583
		4619.1		139.072	107.236		18.522	54.049
		8015.6		213.167	81.394		17.199	20.538
		4461.2		85.012	76.734		34.727	17.25
		4724.6		131.084	155.699		28.56	25.137
		5415.1		123.43	117.688		34.014	30.687
		5060.2		141.171	152.902		39.69	23.851
		5679.8		165.031	63.861		40.172	21.209
		3503.7		134.042	119.254			16.735
		3013.6		95.522	121.176			29.226
		2909.9		107.196	79.929			23.105
		5133.3		126.849	159.651			25.102
		2716.5		97.875	142.375			17.995
		3968		112.089	101.104			15.931
		4811.7		95.081	112.33			26.094
		3323.9		123.039	149.1			19.668
		4292.7		97.956	108.985			20.195
		2799.7		110.564	159.837			15.986
		2299.5		169.272	137.859			19.845
		4981.9		83.107	115.98			20.918
		3294.1		144.353	102.931			26.789
		3804.3		164.617	149.786			29.016
		3931.2		118.488	110.959			18.942
		4245.9		154.559	99.075			37.138
		3451.6		130.703	138.505			28.065
		5718.8		109.554	124.235			37.35
		3813.5		112.463	141.66			33.73
		3615.3		109.458	153.61			41.522
		3364.1		132.624	97.741			42.357
		3678.8		135.806	148.889			56.904
		2795.3		117.42	136.372			17.75
		4246.3		103.058	133.42			16.943
		2806.2		115.223	115.587			22.53
		4729		124.566	139.368			35.819
		4162.3		165.608	96.588			31.999
		3104.6		82.505	122.897			33.808
		2352.9		106.541	145.078			31.78
		6041.7		141.956	113.809			30.169
		3982.9		96.316	86.066			46.925
		3253		136.596	87.568			38.184
		4616.1		128.882	147.821			22.762
		5843		162.734	108.147			17.199
		3762.3		117.121	127.812			11.907
		2023.4			115.526			18.71
		3449.9			152.942			29.016
		2526.6			109.713			11.304
		2393.6			104.676			33.075
		2389.2			76.973			17.651
		2734.5			122.268			16.943
		2939.7			136.891			22.019
		2920			131.73			24.323
		2425.5			78.871			29.136
		2938.8			100.287			33.73
		3533.5			87.047			50.828
		2934.9			97.58			16.839
		4038.4			121.615			46.456
		2740.1			169.762			39.778
		3165.9			175.914			28.621
		4469.9			89.535			22.491
		3251.7			108.276			29.106
		3725.6			101.596			14.249
		3370.7			121.888			28.313
		3523			139.072			18.38
		5591.4			91.984			22.491
		7154.9			144.213			27.783
		7994.2			74.489			21.168
		4231			83.548			39.09
		3470.9			169.597			20.238
		4022.3			116.522			15.485
		4077			126.248			14.553
		4369.3			157.792			23.814
		2121			160.105			31.364
		2308.2			107.562			32.217
		3191.7			241.08			33.391
		2691.1			106.795			30.158
		3201.8			76.916			18.569
		5763.4			141.413			19.081
		2512.6			186.28			41.332
		2468.4			98.872			40.756
		3830.2			143.763			15.429
		4257.2			148.034			22.53
		3547.5			144.262			20.538
		2552.9			141.059			25.276
		5149.5			85.75			35.623
		2561.6			146.184			22.53
		3189.1			120.683			30.198
		3661.3			84.392			26.194
		2599.2			122.583			30.857
		1724.5			113.022			14.792
		2332.3			119.635			29.994
		4027.5			163.368			23.143
		5322.3			118.111			22.607
		3231.1			91.67			25.993
		3577.7			169.23			18.38
		4136.5			129.586			26.984
		4435.8			95.265			36.111
		3490.2			170.795			17.995
		4493.5			123.238			27.146
		5441.8			107.977			26.261
		3467			142.276			29.016
		4178.9			124.059			27.909
		2160.8			139.192			31.999
		1700.9			139.738			29.046
		3639.4			108.752			35.721
		3297.6			188.038			16.365
		4477.8			136.699			30.429
		5691.2			128.106			28.406
		4753.5			186.862			18.38
		3797.8			121.975			26.361
		5446.6			158.258			40.498
		4364.9			158.103			23.814
		3853.8			116.544			18.71
		2282.4			94.166			19.845
		3273.6			105.326			16.149
		4390.3			108.3			22.762
		3535.2			137.522			31.14
		3932.1			147.732			21.537
		3050.4			95.044			17.25
		4350.9			125.518			42.665
		2904.7			103.516			19.668
		2321.8			111.289			26.261
		3981.6			132.465			20.666
		2597.9			129.532			30.687
		2581.3			134.829			17.995
		2789.6			188.15			27.625
		3232.4			145.71			25.414
		3103.8			94.305			34.398
		5786.6			164.361			38.458
		3286.2			119.539			27.625
		5198.5			114.131			27.625
		3432.4			67.356			31.558
		2636.9			157.265			35.153
		3135.7			119.635			33.47
		7580.2			161.525			29.016
		4615.6			144.007			26.261
		4101.9			104.274			29.731
		2906.9			148.848			17.799
		2294.2			107.968			49.59
		2699.9			132.115			30.169
		3061.8			88.285			31.807
		5184			121.953			20.918
		7293.2			141.66			38.184
		2607.6			80.649			24.142
		4606.9			90.835			22.53
		2220.3			79.126			25.276
		4281.7			140.941			30.169
		1328.1			91.708			30.429
		1908.7			141.999			22.491
		6327.9			137.776			29.016
		3316.9			125.015			27.274
		3094.6			113.624			16.577
		4858.5			95.054			33.181
		2180			118.82			18.71
		2680.6			134.302			36.783
		2941.4			156.562			27.814
		2321.8			93.634			18.522
		2859.6			132.247			42.604
		4185.5			165.121			28.406
		3606.6			133.859			28.621
		2804.5			127.256			22.53
		2560.3			158.958			35.028
		5716.1			128.991			27.909
		5076			100.757			22.53
		4787.1			156.902			21.537
		5429.1			169.23			35.5
		2847.8			138.106			22.452
		2764.2			114.216			37.467
		3550.5			144.443			34.143
		2720.4			134.725			27.274
		6780.8			137.605			27.625
		4145.2			159.837			38.933
		5002.9			136.038			27.242
		6597			118.812			34.626
		5027.8			98.339			35.623
		4766.1			136.038			21.374
		4291.8			69.252			28.406
		4183.7			105.815			34.014
		4996.8			126.026			32.541
		4983.2			101.311			27.146
		4584.1			167.191			28.313
		4993.7			139.713			19.668
		4784.1			102.488			19.081
		3836.7			93.849			21.168
		3487.5			122.669			20.918
		2688.5			149.241			40.389
		3567.6			127.283			34.347
		2705.6			119.07			23.667
		3507.2			167.227			25.993
		5226.9			194.665			34.5
		3369.8			92.893			15.931
		4198.6			163.78			17.995
		3202.7			148.165			18.71
		3859			144.086			20.238
		2141.1			86.725			23.851
		1931.1			99.234			24.142
		2123.1			86.087			19.845
		4224.9			130.73			15.931
		2331.9			173.348			22.762
		2544.1			138.663			12.481
		2029.9			107.912			18.71
		2502.1			142.504			31.447
		3624.5			161.455			29.848
		3292.8			145.368			43.195
		3094.1			115.374			20.581
		3366.3			182.828			14.064
		2382.6			145.986			19.845
		3321.7			166.782			27.909
		3207			132.545			23.143
		5287.3			165.396			31.999
		2341.9			94.268			20.918
		2925.2			119.107			30.857
		3486.7			101.828			17.651
		4717.6			146.573			34.143
		5586.6			101.19			31.972
		5330.2			169.365			39.09
		3146.2			137.903			34.347
		3834.5			157.415			27.274
		4964.8			103.921			44.375
		2433.8			172.665			25.688
		5356.4			128.794			29.583
		2723.5			129.39			38.73
		4187.2			166.172			20.538
		4769.6			106.047			34.727
		3702.8			151.135			21.9
		3635.9			97.669			21.374
		3771.5			177.681			24.962
		3734.8			128.556			41.034
		4795			146.088			41.837
		4874.2			144.395			33.075
		3452.5			126.151			14.553
		3462.6			130.193			33.496
		2803.2			186.087			18.569
		3687.5			156.506			24.395
		7185.5			72.657			39.69
		3268.3			97.121			37.42
		4467.7			128.597			27.783
		3204.4			105.815			17.995
		3503.3			110.032			22.178
		4232.7			136.679			29.136
		2243.5			78.905			24.395
		3519.9			111.14			51.749
		4084.8			183.63			40.584
		1954.2			133.806			29.375
		2606.2			120.393			25.276
		4420.9			116.679			27.783
					130.73			34.5
					84.548			29.994
					157.387			37.885
					78.102			25.448
					82.345			20.666
					95.714			15.085
					126.525			26.756
					120.131			29.046
					88.917			39.469
					137.706			21.333
					127.242			47.701
					117.099			14.792
					138.713			20.918
					110.643			22.53
					134.725			33.391
					154.994			37.42
					111.987			27.53
					94.194			20.666
					86.087			35.028
					77.652			35.598
					99.463			39.646
					155.603			20.666
					116.379			24.323
					144.988			26.756
					147.732			23.105
					141.289			17.995
					153.245			21.819
					155.648			20.238
					146.489			16.577
					70.318			16.365
					117.747			20.195
					120.16			28.065
					156.523			19.889
					136.173			27.909
					131.024			23.851
					147.418			25.172
					81.233			34.143
					177.326			16.577
					141.512			25.448
					120.48			56.627
					158.014			19.534
					156.271			21.537
					141.857			41.034
					151.193			24.287
					146.614			28.127
					122.776			21.699
					136.577			17.799
					86.249			29.136
					106.713			29.016
					85.75			43.739
					146.381			23.851
					91.297			26.46
					145.53			23.667
					170.21			29.016
					200.053			29.731
					101.034			30.227
					118.901			38.184
					140.263			26.625
					113.508			20.151
					142.061			17.799
					136.788			27.146
					136.429			19.668
					111.666			20.918
					139.211			20.666
					104.24			30.458
					100.583			52.688
					110.127			22.491
					129.316			17.995
					168.728			26.984
					154.587			20.581
					149.593			21.333
					136.859			22.019
					123.777			15.485
					86.279			39.8
					116.694			26.06
					92.619			17.995
					123.43			17.75
					137.998			20.238
					122.132			22.019
					122.925			52.187
					119.803			27.814
					106.795			32.19
					145.896			41.543
					170.416			41.837
					157.576			22.491
					121.896			16.577
					171.383			33.808
					90.12			29.106
					106.705			27.242
					88.116			25.276
					92.893			52.688
					151.453			32.729
					131.457			29.016
					122.554			32.676
					147.495			19.534
					147.115			27.242
					150.223			17.401
					71.894			39.778
					127.921			12.197
					97.04			23.667
					133.124			13.03
					164.308			25.102
					84.682			28.065
					147.916			34.727
					87.408			25.414
					108.276			23.105
					105.947			26.094
					131.037			33.73
					137.598			30.544
					75.179			23.406
					107.562			25.993
					137.312			19.534
					157.176			18.71
					157.565			30.544
					119.803			30.857
					138.062			24.287
					129.309			28.127
					113.022			29.583
					194.03			15.429
					116.221			30.169
					124.285			23.105
					159.996			31.807
					123.777			34.5
					83.674			22.491
					99.998			29.375
					148.294			21.168
					117.33			26.46
					123.692			31.447
					116.492			22.491
					156.103			27.274
					131.823			18.71
					121.118			33.885
					135.134			32.026
					159.475			27.274
					182.065			34.423
					179.704			37.068
					113.97			23.851
					126.849			25.688
					74.618			28.065
					100.138			19.081
					85.863			14.064
					117.173			39.712
					105.052			19.889
					170.092			35.5
					105.376			16.577
					126.324			23.814
					86.401			30.999
					168.65			29.226
					163.673			21.333
					100.583			21.699
					110.453			23.143
					76.437			29.848
					133.177			21.374
					110.832			31.999
					76.345			36.111
					141.413			14.792
					104.215			24.323
					149.552			14.792
					179.353			28.56
					135.05			26.46
					114.239			27.274
					169.096			31.999
					128.556			26.06
					124.812			31.862
					111.258			26.625
					97.553			17.25
					107.448			19.845
					70.131			25.688
					68.516			32.026
					122.018			28.895
					150.45			27.625
					146.853			20.195
					123.67			52.338
					112.735			25.993
					127.62			33.154
					112.089			37.256
					112.649			31.78
					173.938			24.609
					157.565			22.53
					189.351			24.323
					140.394			30.429
					98.437			41.416
					152.289			26.194
					131.962			21.699
					106.384			48.646
					132.723			46.456
					138.416			42.604
					145.938			21.9
					96.661			19.668
					81.233			28.127
					135.464			23.667
					145.986			35.5
					90.09			44.355
					108.494			41.098
					115.859			33.73
					119.4			31.14
					85.791			27.814
					111.917			31.999
					121.615			22.019
					96.506			22.491
					189.54			23.851
					90.168			31.558
					111.211			30.544
					123.003			32.676
					152.323			23.143
					151.915			31.78
					104.776			21.333
					119.408			36.328
					120.109			23.851
					133.944			26.261
					123.67			27.242
					108.776			28.127
					91.756			32.217
					84.548			20.238
					160.411			19.263
					127.29			16.577
					143.379			11.907
					119.539			21.537
					157.342			19.081
					154.156			21.537
					157.059			26.493
					78.18			16.095
					185.829			29.731
					155.338			35.721
					108.098			14.31
					153.997			17.651
					125.434			21.537
					167.896			26.06
					117.992			44.038
					144.116			22.019
					146.704			33.911
					143.501			29.136
					161.915			25.414
					107.619			42.046
					119.136			51.868
					131.244			23.105
					135.231			30.999
					107.693			27.274
					166.53			24.287
					127.29			36.328
					126.296			33.075
					164.1			27.242
					115.972			25.276
					160.351			17.25
					177.233			29.583
					98.232			28.406
					169.53			38.458
					120.48			34.143
					114.796			29.016
					117.777			28.283
					136.756			28.621
					151.129			35.598
					76.334			24.287
					129.39			28.895
					118.103			22.178
					140.338			29.936
					147.234			20.151
					131.304			28.406
					97.076			20.918
					112.276			13.03
					183.597			21.537
					146.948			22.762
					85.012			26.46
					112.836			46.98
					113.824			35.028
					143.379			22.839
					118.842			29.994
					98.33			37.443
					123.578			36.592
					134.901			17.25
					131.643			21.699
					151.655			28.406
					122.925			19.081
					111.987			34.347
					157.992			29.286
					150.845			28.406
					130.448			30.169
					109.649			38.092
					125.357			38.184
					171.628			21.333
					71.246			25.688
					147.145			30.169
					108.3			22.839
					173.636			37.068
					101.871			29.583
					171.092			22.178
					115.291			23.406
					117.992			24.609
					146.543			32.541
					68.349			42.931
					71.246			36.111
					145.614			33.678
					110.643			34.347
					102.008			35.989
					91.21			18.427
					125.294			27.53
					137.649			17.75
					153.297			32.299
					99.744			23.814
					115.109			23.105
					109.137			21.333
					100.757			42.025
					135.05			27.53
					141.931			29.016
					71.319			51.868
					77.291			29.375
					123.103			23.105
					94.156			16.149
					179.187			32.863
					121.831			34.143
					127.352			49.59
					143.623			26.756
					88.443			31.558
					167.353			33.391
					127.455			27.274
					117.814			34.953
					108.873			35.153
					119.349			40.389
					111.045			22.762
					59.24			18.803
					157.237			41.034
					192.859			31.862
					129.762			47.222
					94.166			35.623
					123.046			21.819
					195.132			27.274
					119.7			18.942
					96.588			24.395
					115.715			23.105
					120.124			32.217
					122.726			32.756
					120.517			26.261
					97.553			31.447
					92.95			19.889
					182.9			22.607
					134.465			29.106
					123.067			32.676
					158.064			25.414
					117.143			30.544
					135.464			22.491
					72.777			25.551
					187.871			37.885
					120.741			15.931
					139.072			22.839
					170.688			18.427
					154.037			31.807
					188.224			18.942
					85.995			27.242
					92.61			31.447
					141.715			22.839
					93.746			17.75
					182.483			30.458
					106.508			23.555
					81.823			31.224
					95.421			40.303
					114.789			35.228
					137.235			28.56
					159.134			34.803
					176.51			21.699
					149.786			24.609
					136.884			33.885
					121.031			29.106
					100.939			42.931
					123.861			17.199
					87.007			15.876
					111.36			25.102
					154.746			35.228
					125.455			15.986
					125.546			28.406
					129.33			28.065
					84.382			39.712
					114.308			41.162
					128.984			29.016
					118.599			24.323
					128.413			20.918
					145.626			35.721
					170.303			20.538
					110.199			22.53
					61.288			35.745
					110.888			17.25
					95.403			34.727
					106.541			23.444
					124.059			31.14
					120.335			21.374
					108.486			24.857
					172.143			14.249
					153.114			26.789
					92.997			26.261
					68.516			18.942
					183.382			17.199
					147.02			35.745
					71.123			25.688
					136.679			23.105
					64.719			20.918
					145.44			29.046
					96.588			33.312
					128.44			43.819
					143.885			43.398
					128.358			22.491
					119.254			31.78
					152.874			22.646
					160.351			40.172
					157.176			27.242
					188.888			31.447
					154.48			19.845
					90.932			19.845
					85.208			24.287
					120.422			23.555
					111.258			20.918
					154.836			26.789
					138.631			23.105
					125.706			33.73
					158.517			41.774
					171.669			32.434
					114.376			38.184
					139.638			33.312
					159.651			12.481
					81.319			37.885
					123.238			21.9
					142.209			28.127
					120.073			22.019
					104.274			31.78
					102.086			25.448
					121.752			27.274
					125.935			42.046
					121.615			33.73
					133.17			41.034
					195.63			21.537
					150.2			63.518
					117.992			37.068
					126.767			43.679
					209.072			26.625
					100.913			23.851
					81.06			18.569
					133.891			38.911
					176.163			26.984
					191.287			38.572
					119.43			42.025
					139.223			22.839
					128.174			16.365
					156.858			57.986
					117.121			21.168
					243.906			26.592
					113.847			24.962
					155.963			40.303
					102.428			24.609
					129.309			27.274
					98.588			26.625
					117.143			37.256
					113.809			26.789
					127.805			22.762
					189.706			28.498
					109.817			35.153
					84.682			36.401
					152.059			27.242
					91.631			10.076
					100.757			27.53
					94.444			29.136
					142.596			33.181
					132.538			20.151
					110.888			26.789
					169.881			22.178
					162.185			27.53
					128.44			31.807
					119.803			27.274
					152.719			33.181
					128.392			34.398
					150.101			13.621
					133.623			16.577
					164.009			21.374
					106.664			31.78
					111.831			17.995
					133.787			25.137
					198.758			42.419
					119.635			24.962
					148.889			29.848
					128.065			37.908
					120.131			22.452
					70.019			42.191
					185.786			34.626
					124.425			19.263
					173.842			37.256
					131.829			36.328
					105.749			34.803
					165.253			25.172
					121.464			34.423
					177.228
					159.431
					128.794
					91.325
					145.68
					155.22
					110.072
					138.814
					149.118
					93.746
					126.856
