# Supplementary material for: Ablation of palladin in adult heart causes dilated cardiomyopathy associated with intercalated disc abnormalities
Source: eLife. 2023 Mar 16;12:e78629. doi: 10.7554/eLife.78629 (PMC10069870; doi:10.7554/eLife.78629)
Supplement: Figure 4—source data 2. [file elife-78629-fig4-data2.xlsx]

## Sheet: Figure 4B
Figure 4–source data 2. Quantification of interstitial and perivascular fibrosis in the left ventricle of inducible cardiomyocyte-specific palladin (cPKOi) and control male mice 24 weeks after tamoxifen (TAM) induction.
B		Interstitial fibrosis (%)					Perivascular fibrosis (%)
		Palldfl/fl TAM	Myh6MCM/+ TAM	Palldfl/fl;Myh6MCM/+ TAM			Palldfl/fl TAM	Myh6MCM/+ TAM	Palldfl/fl;Myh6MCM/+ TAM
		0.3115	0.654	0.3358			0.065292	0.061674	0.06602
		0.5799	0.2742	0.4157			0.097135	0.064076	0.202191
		0.4158	0.2733	0.1899			0.142705	0.087602	0.076553
		0.3256	0.1126	0.4625			0.011712	0.091079	0.064329
		0.661	0.4345	0.2686			0.012994	0.127402	0.083923
				0.2794					0.033936
	Average	0.45876	0.34972	0.325317		Average	0.0659676	0.0863666	0.0878253
	SEM	0.069584	0.0915268	0.0411344		SEM	0.0251101	0.0118622	0.0239119
