# Supplementary material for: Ablation of palladin in adult heart causes dilated cardiomyopathy associated with intercalated disc abnormalities
Source: eLife. 2023 Mar 16;12:e78629. doi: 10.7554/eLife.78629 (PMC10069870; doi:10.7554/eLife.78629)
Supplement: Figure 4—source data 3. [file elife-78629-fig4-data3.xlsx]

## Sheet: Figure 4F
Figure 4–source data 3. Raw data for quantitative real-time PCR (qRT-PCR) on inducible cardiomyocyte-specific palladin (cPKOi) and control male mice 24 weeks after tamoxifen (TAM) induction.
F		Nppb (fold change)				Myh7 (fold change)
		Palldfl/fl TAM	Myh6MCM/+ TAM	Palldfl/fl;Myh6MCM/+ TAM		Palldfl/fl TAM	Myh6MCM/+ TAM	Palldfl/fl;Myh6MCM/+ TAM
		0.83	0.83	2.01		7.07	1.49	21.86
		0.48	1.13	1.38		8.55	1	11.8
		0.9	1.09	1.82		4.03	0.8	11.23
		0.62	0.82	1.11		3.83	0.99	13.54
		1.17	1.13			4.14	0.71
	Average	0.8	1	1.58		5.524	0.998	14.6075
	SEM	0.11887	0.0718331	0.204817		0.963429	0.134959	2.46691
		Ankrd1 (fold change)				Bcl2 (fold change)
		Palldfl/fl TAM	Myh6MCM/+ TAM	Palldfl/fl;Myh6MCM/+ TAM		Palldfl/fl TAM	Myh6MCM/+ TAM	Palldfl/fl;Myh6MCM/+ TAM
		0.95	0.94	1.77		0.87	1.18	1.28
		0.65	0.95	1.28		0.99	1.16	1.31
		1.01	1.21	2.22		0.62	0.8	1.71
		1.13	0.89	1.22		1.04	0.72	1.31
		1.15	1.02			0.76	1.14
	Average	0.978	1.002	1.6225		0.856	1	1.4025
	SEM	0.0900222	0.0559821	0.234179		0.0764591	0.0989949	0.102744
