# Supplementary material for: Ablation of palladin in adult heart causes dilated cardiomyopathy associated with intercalated disc abnormalities
Source: eLife. 2023 Mar 16;12:e78629. doi: 10.7554/eLife.78629 (PMC10069870; doi:10.7554/eLife.78629)
Supplement: Figure 5—source data 1. [file elife-78629-fig5-data1.xlsx]

## Sheet: Figure 5C, D
Figure 5–source data 1. Intercalated disc (ICD) fold amplitude measurements in inducible cardiomyocyte-specific palladin (cPKOi) and control male mice 8 and 24 weeks after tamoxifen (TAM) induction.
C	ICD ampitude (μm) 8W			D	ICD amplitude (μm) 24W
	Palldfl/fl TAM	Myh6MCM/+ TAM	Palldfl/fl;Myh6MCM/+ TAM		Palldfl/fl TAM	Myh6MCM/+ TAM	Palldfl/fl;Myh6MCM/+ TAM
	0.1484	0.121	0.216		0.194	0.112	0.239
	0.19	0.152	0.229		0.199	0.139	0.256
	0.2218	0.1647	0.238		0.235	0.16	0.263
	0.2288	0.1666	0.254		0.25	0.162	0.276
	0.2324	0.1841	0.255		0.26	0.162	0.28
	0.2344	0.1906	0.257		0.262	0.172	0.298
	0.2489	0.1955	0.269		0.264	0.174	0.303
	0.2493	0.2021	0.274		0.264	0.188	0.305
	0.2509	0.2043	0.281		0.274	0.192	0.308
	0.2612	0.2075	0.285		0.274	0.196	0.309
	0.2612	0.2129	0.287		0.295	0.199	0.309
	0.2787	0.2184	0.29		0.3	0.209	0.327
	0.2787	0.2199	0.304		0.301	0.214	0.329
	0.2806	0.2247	0.306		0.302	0.215	0.332
	0.2879	0.2274	0.307		0.304	0.215	0.333
	0.2921	0.2288	0.31		0.307	0.219	0.335
	0.2953	0.2345	0.313		0.309	0.221	0.338
	0.2979	0.2351	0.319		0.314	0.222	0.341
	0.3064	0.2352	0.321		0.317	0.237	0.344
	0.3402	0.2491	0.323		0.317	0.238	0.354
	0.3426	0.2563	0.324		0.317	0.239	0.36
	0.3567	0.2572	0.324		0.32	0.251	0.366
	0.3625	0.2597	0.325		0.323	0.253	0.368
	0.3716	0.2673	0.328		0.324	0.255	0.368
	0.3803	0.2735	0.329		0.326	0.257	0.369
	0.3872	0.2771	0.34		0.327	0.259	0.373
	0.3943	0.2836	0.348		0.333	0.264	0.373
	0.4086	0.2851	0.35		0.34	0.264	0.373
	0.4108	0.2853	0.358		0.345	0.266	0.376
	0.4252	0.2862	0.363		0.345	0.274	0.377
	0.4271	0.2868	0.37		0.346	0.275	0.381
	0.4393	0.2876	0.374		0.349	0.276	0.381
	0.442	0.2916	0.374		0.354	0.281	0.381
	0.4455	0.3031	0.377		0.355	0.285	0.386
	0.4505	0.3094	0.377		0.362	0.285	0.389
	0.4738	0.3116	0.385		0.364	0.288	0.39
	0.4756	0.3141	0.389		0.365	0.293	0.39
	0.4799	0.3141	0.39		0.365	0.294	0.392
	0.4873	0.3167	0.391		0.367	0.297	0.395
	0.5131	0.3183	0.392		0.373	0.297	0.395
	0.5184	0.3196	0.393		0.375	0.309	0.398
	0.5335	0.323	0.396		0.38	0.314	0.399
	0.555	0.3287	0.4		0.388	0.315	0.4
	0.5751	0.3345	0.403		0.389	0.315	0.406
	0.577	0.3404	0.418		0.391	0.319	0.408
	0.6789	0.3426	0.418		0.397	0.326	0.41
	0.7082	0.3428	0.418		0.399	0.328	0.411
	0.8144	0.343	0.42		0.399	0.332	0.411
	0.9725	0.3472	0.421		0.403	0.345	0.414
	1.0277	0.3485	0.423		0.404	0.345	0.42
	1.0399	0.3549	0.425		0.404	0.349	0.42
		0.3585	0.426		0.408	0.35	0.421
		0.3593	0.428		0.419	0.357	0.421
		0.3615	0.428		0.421	0.36	0.421
		0.3669	0.432		0.435	0.373	0.423
		0.3685	0.435		0.435	0.377	0.425
		0.3778	0.438		0.444	0.379	0.425
		0.3779	0.439		0.446	0.399	0.426
		0.3852	0.439		0.465	0.406	0.431
		0.4075	0.443		0.468	0.408	0.432
		0.411	0.445		0.473	0.408	0.433
		0.4142	0.449		0.475	0.409	0.436
		0.4146	0.449		0.484	0.414	0.437
		0.4207	0.449		0.484	0.415	0.445
		0.4295	0.45		0.485	0.415	0.445
		0.4319	0.456		0.487	0.415	0.446
		0.447	0.458		0.496	0.417	0.449
		0.4499	0.459		0.497	0.422	0.451
		0.4656	0.469		0.504	0.427	0.455
		0.4849	0.472		0.512	0.437	0.456
		0.506	0.478		0.515	0.44	0.461
		0.5076	0.481		0.52	0.447	0.465
		0.5148	0.481		0.521	0.449	0.47
		0.5284	0.483		0.522	0.47	0.472
		0.5412	0.483		0.527	0.485	0.476
		0.5465	0.483		0.529	0.489	0.479
		0.5646	0.486		0.53	0.501	0.483
		0.5734	0.488		0.537	0.505	0.483
		0.5823	0.491		0.539	0.521	0.484
		0.6273	0.494		0.542	0.525	0.489
		0.6475	0.494		0.545	0.526	0.491
		0.6507	0.497		0.547	0.533	0.493
		0.6889	0.5		0.563	0.535	0.493
		0.6912	0.501		0.583	0.555	0.494
		0.6994	0.502		0.586	0.567	0.494
		0.7092	0.507		0.59	0.568	0.496
		0.7577	0.511		0.592	0.575	0.496
		0.7663	0.511		0.592	0.577	0.499
		0.8332	0.514		0.6	0.578	0.501
		0.926	0.52		0.606	0.585	0.502
		0.9899	0.521		0.613	0.586	0.503
		0.994	0.522		0.654	0.598	0.505
		1.014	0.522		0.656	0.6	0.505
		1.0176	0.525		0.659	0.606	0.506
		1.1001	0.529		0.665	0.65	0.506
		1.3408	0.532		0.675	0.658	0.507
			0.533		0.677	0.7	0.508
			0.545		0.682	0.711	0.512
			0.547		0.693	0.714	0.517
			0.549		0.696	0.757	0.518
			0.549		0.709	0.763	0.521
			0.553		0.793	0.788	0.522
			0.555		0.802	0.819	0.525
			0.563		0.802	0.821	0.525
			0.568		0.825	0.837	0.526
			0.573		0.843	0.839	0.532
			0.578		0.843	0.842	0.533
			0.581		0.856	0.846	0.535
			0.583		0.86	0.893	0.539
			0.588		0.905	0.897	0.539
			0.59		0.911	0.937	0.544
			0.596		0.937	0.968	0.555
			0.603		0.95	0.986	0.556
			0.607		1.047	1.012	0.557
			0.609		1.052	1.026	0.565
			0.61		1.214	1.063	0.566
			0.615			1.127	0.567
			0.615			1.236	0.569
			0.626			1.352	0.569
			0.637			1.685	0.574
			0.642				0.577
			0.644				0.579
			0.658				0.583
			0.661				0.585
			0.661				0.586
			0.671				0.587
			0.672				0.593
			0.676				0.603
			0.684				0.603
			0.688				0.605
			0.689				0.607
			0.696				0.609
			0.698				0.611
			0.698				0.615
			0.702				0.617
			0.71				0.618
			0.724				0.618
			0.724				0.621
			0.726				0.623
			0.735				0.628
			0.737				0.63
			0.744				0.632
			0.746				0.636
			0.75				0.641
			0.753				0.641
			0.757				0.647
			0.762				0.647
			0.766				0.648
			0.767				0.649
			0.768				0.65
			0.779				0.652
			0.782				0.653
			0.786				0.654
			0.799				0.667
			0.807				0.668
			0.808				0.669
			0.821				0.67
			0.831				0.671
			0.836				0.672
			0.836				0.678
			0.844				0.68
			0.846				0.682
			0.85				0.684
			0.856				0.686
			0.867				0.693
			0.868				0.695
			0.877				0.703
			0.879				0.703
			0.879				0.708
			0.881				0.709
			0.886				0.712
			0.888				0.715
			0.89				0.717
			0.906				0.718
			0.907				0.721
			0.921				0.722
			0.927				0.722
			0.928				0.722
			0.932				0.73
			0.934				0.73
			0.955				0.731
			0.963				0.735
			0.97				0.735
			0.972				0.742
			0.987				0.743
			0.989				0.744
			0.994				0.748
			1.009				0.748
			1.014				0.751
			1.023				0.753
			1.034				0.758
			1.042				0.759
			1.042				0.759
			1.049				0.763
			1.05				0.766
			1.058				0.77
			1.068				0.77
			1.077				0.771
			1.079				0.771
			1.086				0.775
			1.096				0.775
			1.096				0.777
			1.122				0.781
			1.134				0.784
			1.136				0.784
			1.138				0.79
			1.139				0.791
			1.148				0.791
			1.151				0.798
			1.155				0.802
			1.156				0.806
			1.161				0.808
			1.162				0.814
			1.162				0.821
			1.166				0.826
			1.169				0.827
			1.171				0.829
			1.172				0.83
			1.173				0.832
			1.185				0.832
			1.191				0.833
			1.2				0.834
			1.2				0.837
			1.203				0.838
			1.209				0.84
			1.218				0.84
			1.223				0.842
			1.229				0.844
			1.235				0.844
			1.245				0.845
			1.251				0.847
			1.258				0.849
			1.292				0.852
			1.293				0.853
			1.299				0.853
			1.299				0.858
			1.312				0.861
			1.315				0.863
			1.318				0.87
			1.32				0.87
			1.346				0.871
			1.358				0.878
			1.369				0.879
			1.371				0.879
			1.378				0.881
			1.38				0.883
			1.39				0.883
			1.401				0.884
			1.418				0.886
			1.421				0.888
			1.448				0.888
			1.483				0.894
			1.491				0.895
			1.491				0.895
			1.492				0.896
			1.495				0.897
			1.503				0.898
			1.525				0.901
			1.551				0.905
			1.552				0.907
			1.573				0.907
			1.579				0.908
			1.6				0.918
			1.602				0.922
			1.632				0.924
			1.641				0.926
			1.644				0.928
			1.713				0.931
			1.72				0.934
			1.783				0.938
			1.805				0.941
			1.857				0.947
			1.982				0.953
			2.046				0.96
			2.058				0.963
			2.111				0.966
			2.258				0.966
			2.728				0.966
			4.211				0.974
							0.975
							0.976
							0.976
							0.977
							0.993
							0.999
							1.004
							1.006
							1.007
							1.007
							1.011
							1.017
							1.017
							1.021
							1.022
							1.024
							1.026
							1.031
							1.033
							1.036
							1.039
							1.039
							1.041
							1.042
							1.047
							1.05
							1.05
							1.051
							1.056
							1.057
							1.067
							1.067
							1.07
							1.07
							1.072
							1.075
							1.077
							1.08
							1.082
							1.085
							1.087
							1.09
							1.092
							1.095
							1.097
							1.1
							1.102
							1.105
							1.107
							1.11
							1.112
							1.115
							1.117
							1.12
							1.122
							1.125
							1.127
							1.13
							1.132
							1.135
							1.137
							1.14
							1.142
							1.145
							1.147
							1.15
							1.152
							1.155
							1.157
							1.16
							1.162
							1.165
							1.167
							1.17
							1.172
							1.175
							1.177
							1.18
							1.182
							1.185
							1.187
							1.19
							1.192
							1.195
							1.197
							1.2
							1.202
							1.32
							1.322
							1.326
							1.341
							1.346
							1.349
							1.357
							1.371
							1.417
							1.417
							1.418
							1.425
							1.442
							1.458
							1.461
							1.476
							1.491
							1.491
							1.51
							1.51
							1.524
							1.525
							1.53
							1.531
							1.533
							1.534
							1.534
							1.545
							1.551
							1.565
							1.573
							1.579
							1.586
							1.589
							1.605
							1.632
							1.665
							1.672
							1.711
							1.714
							1.718
							1.728
							1.756
							1.808
							1.831
							1.898
							1.977
							2.003
							2.026
							2.09
							2.118
							2.31
							2.475
							2.606
