# Supplementary material for: Ablation of palladin in adult heart causes dilated cardiomyopathy associated with intercalated disc abnormalities
Source: eLife. 2023 Mar 16;12:e78629. doi: 10.7554/eLife.78629 (PMC10069870; doi:10.7554/eLife.78629)
Supplement: Figure 6—source data 2. [file elife-78629-fig6-data2.xlsx]

## Sheet: Figure 6B
Figure 6–source data 2. Densitometry on Western blots on inducible cardiomyocyte-specific palladin (cPKOi) and control male mice 8 weeks after tamoxifen (TAM) induction.
B	Densitometry of Western blots
		Desmoplakin (fold change)					Desmoglein (fold change)					α-E-catenin (fold change)					β-catenin (fold change)					γ-catenin
		Palldfl/fl TAM	Myh6MCM/+ TAM	Palldfl/fl;Myh6MCM/+ TAM			Palldfl/fl TAM	Myh6MCM/+ TAM	Palldfl/fl;Myh6MCM/+ TAM			Palldfl/fl TAM	Myh6MCM/+ TAM	Palldfl/fl;Myh6MCM/+ TAM			Palldfl/fl TAM	Myh6MCM/+ TAM	Palldfl/fl;Myh6MCM/+ TAM			Palldfl/fl TAM	Myh6MCM/+ TAM	Palldfl/fl;Myh6MCM/+ TAM
		1.77	1.52	0.73			1.62	1.09	1.26			1.26	0.77	0.94			1.17	1.17	1.07			0.98	0.83	0.6
		2.15	0.69	1.94			1.57	0.77	1.84			1.24	0.69	0.57			1.58	1.51	1.22			1.06	0.94	0.9
		1.38	0.92	1.57			0.79	1.29	2.38			0.89	1.19	0.78			0.83	0.73	1.22			0.87	1.38	1.35
		1.17	0.87	1.35			0.82	0.86	1.74			0.92	1.36	0.91			1.19	0.6	0.85			0.91	0.85	1.2
		1.57					1.25		1.52			0.96		1.29			1.08		0.74			0.76		0.94
		0.47					1.4		2.21			0.86					1.17
		1.14					1.95				Average						0.84
	Average	1.37857	1	1.3975		Average	1.34286	1.0025	1.825		SEM	1.02167	1.0025	0.898		Average	1.12286	1.0025	1.02		Average	0.916	1	0.998
	SEM	0.266996	0.180231	0.25362		SEM	0.212911	0.117145	0.209279			0.0900231	0.161935	0.131596		SEM	0.126745	0.208542	0.108915		SEM	0.0566348	0.128906	0.144931
		Vinculin (fold change)					N-cadherin (fold change)					Connexin 43 (fold change)					FHOD1 (fold change)					SORBS2
		Palldfl/fl TAM	Myh6MCM/+ TAM	Palldfl/fl;Myh6MCM/+ TAM			Palldfl/fl TAM	Myh6MCM/+ TAM	Palldfl/fl;Myh6MCM/+ TAM			Palldfl/fl TAM	Myh6MCM/+ TAM	Palldfl/fl;Myh6MCM/+ TAM			Palldfl/fl TAM	Myh6MCM/+ TAM	Palldfl/fl;Myh6MCM/+ TAM			Palldfl/fl TAM	Myh6MCM/+ TAM	Palldfl/fl;Myh6MCM/+ TAM
		1.23	0.79	0.83			1.05	1.14	1.49			0.99	0.84	1.84			0.68	0.95	0.96			0.93	1.02	1.46
		1.01	0.61	1.31			0.86	1.2	1.23			0.84	1.07	1.79			0.55	0.88	0.82			0.86	1.51	1.35
		1.29	1.32	1.37			1.25	1	0.78			1.26	1.22	0.67			0.74	1.21	1.18			1.12	0.79	2.27
		1.11	1.28	0.99			1.16	0.66	0.8			0.83	0.93	1.51			1.06	0.96	1.06			1.18	0.69	1.47
		0.97		1.41			0.77		1.26				0.74	0.8			0.77		0.58			0.99		1.46
		0.61		1.62			0.97		1.32				0.78	0.79								1.35		1.37
		1.25									Average		1.42
	Average	1.06714	1	1.255		Average	1.01	1	1.14667		SEM	0.98	1	1.23333		Average	0.76	1	0.92		Average	1.07167	1.0025	1.56333
	SEM	0.117817	0.177247	0.145662		SEM	0.0903881	0.12083	0.145316			0.10025	0.1252	0.269827		SEM	0.0938749	0.0722265	0.115758		SEM	0.0903004	0.182728	0.174976
