# Supplementary material for: Ablation of palladin in adult heart causes dilated cardiomyopathy associated with intercalated disc abnormalities
Source: eLife. 2023 Mar 16;12:e78629. doi: 10.7554/eLife.78629 (PMC10069870; doi:10.7554/eLife.78629)
Supplement: Figure 6—source data 3. [file elife-78629-fig6-data3.xlsx]

## Sheet: Figure 6C
Figure 6–source data 3. Quantitative real-time PCR (qRT-PCR) analysis on left ventricular biopsies from patients with dilated (DCM) and ischemic (ICM) cardiomyopathy vs. non-failing control (Ctrl) hearts.
C		MYPN (fold change)					PALLD 200 kDa (fold change)
		Ctrl	DCM	ICM			Ctrl	DCM	ICM
		1.8189	1.9146	1.2666			1.5296	2.2184	1.364
		1.6798	4.4946	2.7344			1.7044	1.4149	2.7881
		0.937	2.6438	1.068			1.8203	1.0673	0.8037
		0.6868	5.4534	2.2405			0.5191	0.996	2.1295
		0.8618	1.9267	1.1106			1.0238	1.7205	1.3165
		1.5119	3.852	0.8573			1.3184	2.7964	1.2637
		0.3729	2.2373	1.6544			0.5997	3.0317	3.6029
		1.4291	2.0195	2.3395			1.3682	1.8392	2.2226
		0.8301	2.7741	1.4351			0.8164	3.1609	0.6402
		1.5875	7.7662	0.5179			1.651	3.2609	1.3719
		0.6143	1.3544	0.6989			1.242	1.3418	0.7278
		0.5373	1.8989	1.4607			0.5646	1.4085	1.4312
		0.8163	0.9213	0.3942			0.4059	0.6262	0.2677
		0.8265	3.0518	0.0268			0.4026	1.9442	0.0127
		0.859	1.5175	0.5065			0.3749	1.0046	0.6732
		0.631					0.6589
	Average	1.00001	2.92174	1.22076		Average	0.999988	1.85543	1.37438
	SEM	0.112733	0.468517	0.200345		SEM	0.129118	0.222101	0.250018
		PALLD all isoforms(fold change)					ANKRD1 (fold change)
		Ctrl	DCM	ICM			Ctrl	DCM	ICM
		2.4678	0.2435	0.313			1.4586	3.0263	2.0724
		0.8075	0.2516	0.3024			2.3891	7.161	9.4114
		2.0787	0.3654	0.2699			1.2729	6.4891	0.4789
		1.314	0.2315	0.2838			0.4521	9.8119	9.7055
		0.5847	0.323	0.3555			0.5653	5.3634	3.3067
		1.4614	0.4062	0.4173			0.544	7.6136	2.2812
		0.2023	0.315	0.4444			0.1052	7.4012	6.6932
		0.4007	0.2804	0.3379			1.1547	5.4676	4.9783
		0.7586	0.4356	0.4794			0.4023	8.5515	1.2761
		2.4895	0.3986	0.2244			1.3474	16.8383	2.6077
		1.3697	0.3813	0.3631			2.8479	2.8123	1.7929
		0.4075	0.4229	0.3582			0.0904	1.8898	2.2748
		0.3391	0.3118	0.1908			0.6905	2.1671	0.9929
		0.4097	0.6335	0.2554			0.7942	5.9888	0.0458
		0.4948	0.4364				0.7373	3.1498	1.0441
		0.414					1.1481
	Average	1	0.362447	0.32825		Average	1	6.24878	3.26413
	SEM	0.193466	0.0265668	0.0220489		SEM	0.190232	0.983524	0.793107
