# Supplementary material for: Ablation of palladin in adult heart causes dilated cardiomyopathy associated with intercalated disc abnormalities
Source: eLife. 2023 Mar 16;12:e78629. doi: 10.7554/eLife.78629 (PMC10069870; doi:10.7554/eLife.78629)
Supplement: Figure 6—source data 5. [file elife-78629-fig6-data5.xlsx]

## Sheet: Figure 6E
Figure 6–source data 5. Densitometry of Western blots on left ventricular biopsies from patients with dilated (DCM) and ischemic (ICM) cardiomyopathy vs. healthy control (Ctrl) hearts.
E	Densitometry of Western blots
		MYPN (fold change)					PALLD 200 kDa isoform (fold change)					PALLD 90 kDa isoform (fold change)					CARP/Ankrd1 (fold change)					γ-catenin
		Ctrl	DCM	ICM			Ctrl	DCM	ICM			Ctrl	DCM	ICM			Ctrl	DCM	ICM
		1.66	0.83	1.11			1.22	0.97	0.88			0.66	0.99	1.1			0.5	2.01	1.07			0.98	0.83	0.6
		1.23	1.89	1.52			1.19	1.49	1.17			0.92	1.28	1.02			1.09	2.17	0.37			1.06	0.94	0.9
		1.14	1.9	0.67			0.84	1.58	1.02			0.89	1.07	1.06			2.55	3.44	2.41			0.87	1.38	1.35
		0.83	0.95	0.89			0.75	1.2	0.96			1.22	0.88	0.82			0.87	4	2.49			0.91	0.85	1.2
		0.75	2.08	1.81								1.27	1.45	1.23			0.94	0.88	1.48			0.76		0.94
		0.65	0.85	1.26								0.96	0.83	0.98			0.46	3.08	2.54
		0.74	1.68	1.72								1.07	1.2	1.02			0.59	2.09	2.1
			1.35															1.26
			0.7															1.66
			1.48
	Average	1	1.371	1.28286		Average	1	1.31	1.0075		Average	0.998571	1.1	1.03286		Average	1	2.28778	1.78		Average	0.916	1	0.998
	SEM	0.181384	0.255565	0.212676		SEM	0.119931	0.139344	0.0612883		SEM	0.10446	0.111654	0.0620963		SEM	0.361755	0.513851	0.416493		SEM	0.0566348	0.128906	0.144931
